# Supplementary material for: Closed Aromatic Tubes—Capsularenes
Source: PubMed Central journal article supplement — Angew Chem Int Ed Engl. 2022 Sep 6;61(41):e202211304. doi: 10.1002/anie.202211304 (PMC9825917; doi:10.1002/anie.202211304), 2022-09-06
Supplement: ANIE-61-0-s004.pdf [file ANIE-61-0-s004.pdf]

## Supporting Information

### **Closed Aromatic Tubes—Capsularenes**

*R. Z. Pavlović, L. Zhiquan, T. J. Finnegan, C. A. Waudby, X. Wang, V. W. L. Gunawardana, X. Zhu, C. M. Wong, T. Hamby, C. E. Moore, N. Hofer, D. W. McComb, C. S. Sevov, J. D. Badjić\**

# Closed Aromatic Tubes – Capsularenes

Radoslav Z. Pavlović,<sup>[a]</sup> Lei Zhiquan,<sup>[a]</sup> Tyler J. Finnegan,<sup>[a]</sup> Christopher A. Waudby,<sup>[b]</sup> Xiuze Wang,<sup>[a]</sup> Vageesha W. Liyana Gunawardana,<sup>[a]</sup> Xingrong Zhu,<sup>[a]</sup> Curt M. Wong,<sup>[a]</sup> Taylor Hamby,<sup>[a]</sup> Curtis E. Moore,<sup>[a]</sup> Christo S. Sevov,<sup>[a]</sup> and Jovica D. Badjić\*<sup>[a]</sup>

## Supporting Information

# Contents

|                                         |    |
|-----------------------------------------|----|
| General Information.....                | 3  |
| Syntheses of Compounds.....             | 4  |
| Spectroscopic Characterizations.....    | 12 |
| Mechanistic Studies.....                | 31 |
| Electrochemical Measurements.....       | 66 |
| Thermal Gravimetric Analysis (TGA)..... | 70 |
| Computational Studies.....              | 75 |
| X-ray Crystallographic Data.....        | 92 |

## General Information

All chemicals were purchased from commercial sources and used as received unless stated otherwise. All solvents were dried prior to use according to standard literature procedures. Chromatographic purifications were performed with silica gel 60 (SiO<sub>2</sub>, Sorbent Technologies 40–75 μm, 200 × 400 mesh). Thin-layer chromatography was performed on a silica gel plate w/UV254 (200 μm). Chromatograms were visualized by UV light or stained with I<sub>2</sub>, CAM or KMnO<sub>4</sub>. All electrochemical analyses were carried out in a nitrogen-filled glovebox in solutions of acetonitrile (MeCN) with recrystallized tetrabutylammonium hexafluorophosphate (TBAPF<sub>6</sub>) as supporting electrolyte. Cyclic voltammetry was performed with a Biologic VSP multichannel potentiostat/galvanostat. Cyclic voltammetry was carried out in a three-electrode electrochemical cell, consisting of a glassy carbon disk working electrode (0.07 cm<sup>2</sup>, BASi), a Ag/Ag<sup>+</sup> pseudo-reference electrode (BASi) with 0.01 M AgBF<sub>4</sub> (Millipore Sigma) in 0.02 M TBAPF<sub>6</sub> in MeCN, and a platinum wire counter electrode (23 cm, ALS). All cyclic voltammetry experiments were performed at a scan rate of 100 mV/s in a MeCN electrolyte containing 0.02 M recrystallized TBAPF<sub>6</sub> unless otherwise noted. Reference electrodes were calibrated against an internal voltage reference of ferrocene (1–10 mM). All <sup>1</sup>H and <sup>13</sup>C NMR samples were kept in class B glass NMR tubes (Wilmad Lab Glass). NMR experiments were performed with Bruker 400, 600, 700, and 850 MHz spectrometers. Chemical shifts are expressed in parts per million (δ, ppm), whereas coupling constants (*J*) are given in Hertz (Hz). Residual solvent protons were used as internal standards: <sup>1</sup>H NMR spectra, CDCl<sub>3</sub> = 7.26 ppm, CD<sub>2</sub>Cl<sub>2</sub> = 5.32 ppm; <sup>13</sup>C NMR spectra, CDCl<sub>3</sub> = 77.16 ppm, CD<sub>2</sub>Cl<sub>2</sub> = 53.84 ppm; CDCl<sub>3</sub> and CD<sub>2</sub>Cl<sub>2</sub> were purchased from Cambridge Isotope Laboratories. High-resolution mass spectra (HRMS) were obtained using positive electrospray ionization (ESI) techniques recorded on a Bruker-ESI TOF instrument. All the kinetic measurements were performed on Bruker 850 MHz (5mm Tripleresonance Inverse (TCI) cryoprobe with Z-Gradients) spectrometers. Satorius Quintix semi-micro balance was used in the preparation of standard solutions. All UV-Vis spectra were recorded on Shimadzu UV-2401 PC UV-Vis Spectrophotometer using quartz 1 cm cuvettes. Fluorescence spectra were recorded with Shimadzu RF-5301 using quartz 1 cm cuvettes.



# Syntheses of Compounds

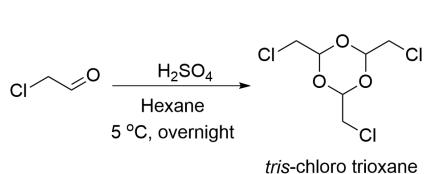

**Tris-Chloro Trioxane ((2*s*,4*s*,6*s*)-2,4,6-tris(chloromethyl)-1,3,5-trioxane).** This compound was obtained using slightly modified procedure reported by Shi et al.<sup>1</sup> Chloroacetaldehyde solution (~50 wt. % in H<sub>2</sub>O) (12 g, 0.076 mol) was extracted by diethyl ether multiple times and the organic layers were combined. After evaporating diethyl ether under reduced pressure, the remained liquid was diluted by 20 ml of *n*-hexane and cooled to 0 °C. Maintaining the same temperature, concentrated sulfuric acid (3 ml) was added slowly with vigorous stirring continuing for 3 hours and was kept in freezer (5 °C) overnight. Then iced water (50 ml) was slowly added, the solid was extracted by CH<sub>2</sub>Cl<sub>2</sub> (2 x 40 ml), washed with water (20 ml), and purified by chromatography (SiO<sub>2</sub>, Hexanes:CH<sub>3</sub>CO<sub>2</sub>Et = 20:1 to 10:1). Recrystallization from *n*-hexane (5 ml) gave *tris*-chloro trioxane (2.0 g, 33%) as a colorless solid. <sup>1</sup>H NMR (600 MHz, CDCl<sub>3</sub>): δ (ppm) 5.16 (s, 3H), 3.61 (d, *J* = 4.7 Hz, 6H). <sup>13</sup>C NMR (125 MHz, CDCl<sub>3</sub>): δ (ppm) 99.70, 43.03.

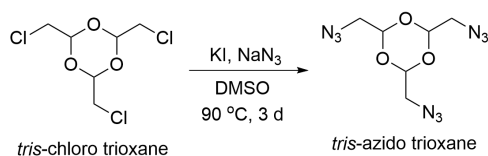

**Tris-Azido Trioxane ((2*s*,4*s*,6*s*)-2,4,6-tris(azidomethyl)-1,3,5-trioxane).** To a suspension of KI (4.95g, 29.8 mmol) and NaN<sub>3</sub> (2.9g, 44.7 mmol) in DMSO (40 ml) *tris*-chloro trioxane (1.17 g, 4.97 mmol) was added. The mixture was heated to 90 °C for 3 days. Upon cooling down to room temperature, the reaction mixture was diluted with H<sub>2</sub>O (30 ml), extracted with CH<sub>2</sub>Cl<sub>2</sub> (2 x 40 ml), and combined organic layers washed with brine (4 x 15 ml). The organic layer was dried with Na<sub>2</sub>SO<sub>4</sub> and concentrated in vacuo. The resulting residue was purified by flash column chromatography (SiO<sub>2</sub>, Hexanes: CH<sub>3</sub>CO<sub>2</sub>Et = 10:1) to give *tris*-azido trioxane (963.2 mg, 76%) as a transparent oil. <sup>1</sup>H NMR (400 MHz, CDCl<sub>3</sub>): δ (ppm) 5.14 (t, *J* = 4.5 Hz, 3H), 3.41 (d, *J* = 4.5 Hz, 6H). <sup>13</sup>C NMR (100 MHz, CDCl<sub>3</sub>): δ (ppm) 99.04, 52.36. HRMS (ESI): *m/z* calcd for C<sub>6</sub>H<sub>9</sub>N<sub>9</sub>NaO<sub>3</sub>: 278.0721, [M+Na]<sup>+</sup>; found: 278.0721, [M+Na]<sup>+</sup>.

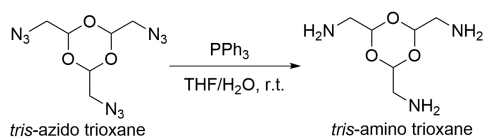

**Tris-Amino Trioxane (((2*s*,4*s*,6*s*)-1,3,5-trioxane-2,4,6-triyl)trimethanamine).** To a solution of *tris*-azido trioxane (120 mg, 0.47 mmol) in THF/H<sub>2</sub>O (16/1, 10 ml), PPh<sub>3</sub> (616.5 mg, 2.35 mmol) was added under an atmosphere of nitrogen. The mixture was stirred at 35 °C overnight, followed by removal of THF in vacuo, addition of H<sub>2</sub>O (4 ml) and extraction with Et<sub>2</sub>O (4 x 4 ml). The aqueous layer was lyophilized to give *tris*-amino trioxane (70.7 mg, 85%) as a white solid. <sup>1</sup>H NMR (400 MHz, CDCl<sub>3</sub>): δ (ppm) 4.92 (t, *J* = 4.3 Hz, 3H), 2.87 (d, *J* = 4.3 Hz, 6H). <sup>13</sup>C NMR (100 MHz, CDCl<sub>3</sub>): δ (ppm) 100.99, 45.04. HRMS (ESI): *m/z* calcd for C<sub>6</sub>H<sub>16</sub>N<sub>3</sub>O<sub>3</sub>: 178.1186, [M+H]<sup>+</sup>; found: 178.1187, [M+H]<sup>+</sup>.

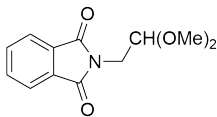

S3-acetal

**2-(2,2-dimethoxyethyl)isoindoline-1,3-dione:** To a suspension of phthalic anhydride (50 mg, 0.338 mmol) in anhydrous toluene (20 ml) the 2,2-dimethoxyethan-1-amine (47.81 μl, 0.439 mmol, 1.3 equiv.) and dry pyridine (168.4 μl, 2.09 mmol) were added. The mixture was purged with nitrogen (5 min), sealed, and stirred at 120 °C overnight. Upon cooling down to room temperature, the solvent was removed under reduced pressure. The residue was then purified by flash column chromatography (SiO<sub>2</sub>, CH<sub>2</sub>Cl<sub>2</sub> → CH<sub>2</sub>Cl<sub>2</sub>:MeOH = 100:1) to give 67 mg (84.4%) of 2-(2,2-dimethoxyethyl)isoindoline-1,3-dione as a white solid. NMR spectra of the product match the ones reported earlier (*Tetrahedron*, **2008**, *64*, 6794-6800). <sup>1</sup>H NMR (400 MHz, CDCl<sub>3</sub>): δ (ppm) 7.89 – 7.82 (m, 2H),

7.76 – 7.68 (m, 2H), 4.77 (t,  $J = 5.8$  Hz, 1H), 3.83 (d,  $J = 5.8$  Hz, 2H), 3.38 (s, 6H).  $^{13}\text{C}$  NMR (101 MHz,  $\text{CDCl}_3$ ):  $\delta$  (ppm) 168.10, 134.00, 132.07, 123.37, 100.02, 53.19, 38.79.

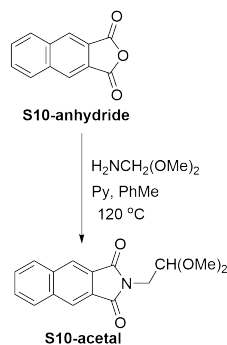

**2-(2,2-dimethoxyethyl)-1H-benzo[*f*]isoindole-1,3(2*H*)-dione:** To a suspension of naphtho[2,3-*c*]furan-1,3-dione (45 mg, 0.227 mmol) in anhydrous toluene (18 ml), 2,2-dimethoxyethan-1-amine (32.2  $\mu\text{l}$ , 0.295 mmol) and dry pyridine (113.4  $\mu\text{l}$ , 1.41 mmol) were added. The mixture was purged with nitrogen (5 min), sealed, and stirred at 120 °C overnight. Upon cooling down to room temperature, the solvent was removed under reduced pressure. The residue was then purified by flash column chromatography ( $\text{SiO}_2$ ,  $\text{CH}_2\text{Cl}_2 \rightarrow \text{CH}_2\text{Cl}_2:\text{MeOH} = 100:1$ ) to give 54 mg (83%) of 2-(2,2-dimethoxyethyl)-1H-benzo[*f*]isoindole-1,3(2*H*)-dione as a white solid. NMR spectra of the product match the ones reported earlier (*Tetrahedron*, **2008**, *64*, 6794-6800).  $^1\text{H}$  NMR (400 MHz,  $\text{CDCl}_3$ ):  $\delta$  (ppm) 7.89 – 7.82 (m, 2H), 7.76 – 7.68 (m, 2H), 4.77 (t,  $J = 5.8$  Hz, 1H), 3.83 (d,  $J = 5.8$  Hz, 2H), 3.38 (s, 6H).  $^{13}\text{C}$  NMR (101 MHz,  $\text{CDCl}_3$ ):  $\delta$  (ppm)

$\delta$  168.10, 134.00, 132.07, 123.37, 100.02, 53.19, 38.79.  $^{13}\text{C}$  NMR (101 MHz,  $\text{CDCl}_3$ ):  $\delta$  (ppm) 167.82, 135.50, 130.31, 129.21, 127.75, 124.83, 100.00, 53.23, 39.07. HRMS (ESI):  $m/z$  calcd for  $\text{C}_{16}\text{H}_{15}\text{NO}_4$ : 308.0899,  $[\text{M}+\text{Na}]^+$ ; found: 308.0878,  $[\text{M}+\text{Na}]^+$ .

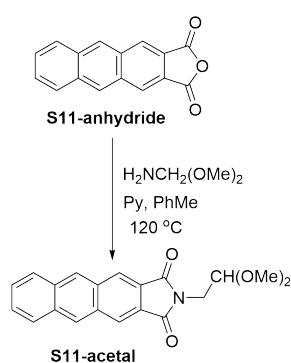

**2-(2,2-dimethoxyethyl)-1H-naphtho[2,3-*f*]isoindole-1,3(2*H*)-dione:** To a suspension of anthra[2,3-*c*]furan-1,3-dione (50 mg, 0.201 mmol) in anhydrous toluene (16 ml), 2,2-dimethoxyethan-1-amine (24 mg, 29  $\mu\text{L}$ , 0.439 mmol) and dry pyridine (101  $\mu\text{l}$ , 2.09 mmol) were added. The mixture was purged with nitrogen (5 min), sealed, and stirred at 120 °C overnight. Upon cooling down to room temperature, the solvent was removed under reduced pressure. The residue was then purified by flash column chromatography ( $\text{SiO}_2$ ,  $\text{CH}_2\text{Cl}_2 \rightarrow \text{CH}_2\text{Cl}_2:\text{MeOH} = 100:1$ ) to give 56 mg (83%) of 2-(2,2-dimethoxyethyl)-1H-naphtho[2,3-*f*]isoindole-1,3(2*H*)-dione as a yellow solid.  $^1\text{H}$  NMR (800 MHz,  $\text{CDCl}_3$ ):  $\delta$  (ppm) 8.65 (s, 2H), 8.53 (s, 2H), 8.09 (dd,  $J = 6.3, 3.3$  Hz, 2H), 7.63 (dd,  $J = 6.5, 3.1$  Hz, 2H), 4.86 (t,  $J = 5.9$  Hz, 1H), 3.93 (d,  $J = 5.9$  Hz, 2H), 3.42 (s, 6H).  $^{13}\text{C}$  NMR (201 MHz,  $\text{CDCl}_3$ ):  $\delta$  (ppm) 167.62, 133.30, 131.98, 130.13,

128.49, 127.58, 126.56, 126.06, 99.97, 53.23, 39.15. HRMS (ESI):  $m/z$  calcd for  $\text{C}_{20}\text{H}_{17}\text{NO}_4$  358.1055,  $[\text{M}+\text{Na}]^+$ ; found: 358.1061,  $[\text{M}+\text{Na}]^+$ .

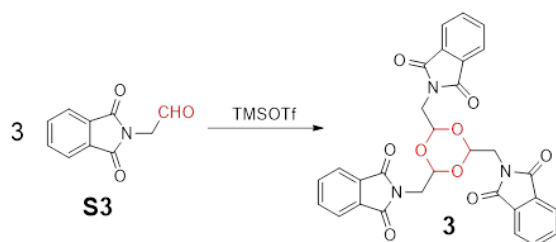

**2,2',2''-(((2*s*,4*s*,6*s*)-1,3,5-trioxane-2,4,6-triyl)tris(methylene))tris(isoindoline-1,3-dione) 3.**

TMS triflate (2.7  $\mu\text{l}$ , 0.015 mmol) was added to a stirred solution of 2-(1,3-dioxoisindolin-2-yl)acetaldehyde (94.5 mg, 0.5 mmol) in anhydrous  $\text{CH}_2\text{Cl}_2$  (8 ml), at a room temperature and under nitrogen atmosphere. After circa 12 h, the solvent was removed under reduced pressure and the residue was purified by flash column chromatography ( $\text{SiO}_2$ , Hexanes:  $\text{CH}_3\text{CO}_2\text{Et}=3:1$ , then  $\text{CH}_3\text{OH}:\text{CH}_2\text{Cl}_2 = 1:30$ ) to give compound **3** (47.2 mg, 50%) as a white solid.,  $^1\text{H}$  NMR (400 MHz,  $\text{CDCl}_3$ ):  $\delta$  (ppm) 7.76 (dd,  $J = 5.6, 3.0$  Hz, 6H), 7.67 (dd,  $J = 5.4, 3.1$  Hz, 6H), 5.20 (t,  $J = 5.3$  Hz, 3H), 3.90 (d,  $J = 5.3$  Hz, 6H).  $^{13}\text{C}$  NMR (100 MHz,  $\text{CDCl}_3$ ):  $\delta$  (ppm) 167.52, 133.89, 131.87, 123.34, 96.72, 40.06. HRMS (ESI):  $m/z$  calcd for  $\text{C}_{30}\text{H}_{21}\text{N}_3\text{NaO}_9$ : 590.1170,  $[\text{M}+\text{Na}]^+$ ; found: 590.1195,  $[\text{M}+\text{Na}]^+$ .

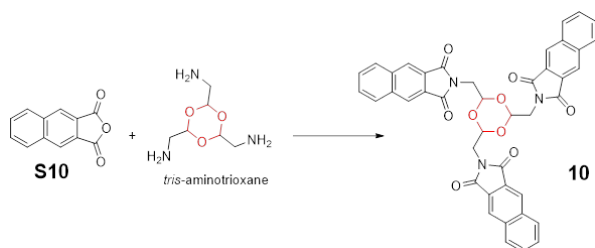

**2,2',2''-(((2s,4s,6s)-1,3,5-trioxane-2,4,6-triyl)tris(methylene))tris(1H-benzo[f]isoindole-1,3(2H)-dione) 10.** Naphtho[2,3-*c*]furan-1,3-dione (25 mg, 0.127 mmol), *tris*-amino trioxane (4.5 mg, 0.0254 mmol) and glacial acetic (10 ml) were added to an oven-dried vial. The vial was sealed, and the reaction mixture was stirred at 120 °C overnight. Upon cooling the reaction mixture to a room temperature,

the solvent was removed under reduced pressure and the residue was purified by flash column chromatography (SiO<sub>2</sub>, CH<sub>2</sub>Cl<sub>2</sub> to CH<sub>2</sub>Cl<sub>2</sub>:MeOH = 100:1) to give compound **10** (10 mg, 55%) as a white solid. <sup>1</sup>H NMR (400 MHz, CDCl<sub>3</sub>) δ 8.11 (s, 6H), 7.86 (dd, *J* = 6.1, 3.3 Hz, 6H), 7.64 (dd, *J* = 6.2, 3.3 Hz, 6H), 5.31 (t, *J* = 5.4 Hz, 3H), 3.99 (d, *J* = 5.4 Hz, 6H). <sup>13</sup>C NMR (101 MHz, CDCl<sub>3</sub>) δ 167.2, 135.3, 130.2, 129.1, 127.5, 124.7, 96.7, 40.3. HRMS (ESI): *m/z* calcd for C<sub>42</sub>H<sub>27</sub>N<sub>3</sub>O<sub>9</sub>: 740.1640, [M+Na]<sup>+</sup>; found: 740.1656, [M+Na]<sup>+</sup>.

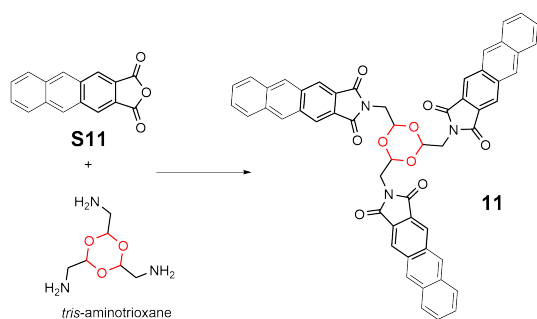

**2,2',2''-(((2s,4s,6s)-1,3,5-trioxane-2,4,6-triyl)tris(methylene))tris(1H-naphtho[2,3-*f*]isoindole-1,3(2H)-dione) 11.** Anthra[2,3-*c*]furan-1,3-dione (20 mg, 0.07521 mmol), *tris*-amino trioxane (4.5 mg, 0.0203 mmol) and glacial acetic (6.8 ml) were added to an oven-dried vial. The vial was sealed, and the reaction mixture was stirred at 120 °C overnight. Upon cooling the reaction mixture to a room temperature, the solvent was removed under reduced pressure and the residue was purified by flash column chromatography (SiO<sub>2</sub>, CH<sub>2</sub>Cl<sub>2</sub> to CH<sub>2</sub>Cl<sub>2</sub>:MeOH = 100:1)

to give compound **10** (10.1 mg, 57%) as a white solid. <sup>1</sup>H NMR (400 MHz, CDCl<sub>3</sub>): δ (ppm) 8.11 (s, 6H), 7.86 (dd, *J* = 6.1, 3.3 Hz, 6H), 7.64 (dd, *J* = 6.2, 3.3 Hz, 6H), 5.31 (t, *J* = 5.4 Hz, 3H), 3.99 (d, *J* = 5.4 Hz, 6H). HRMS (ESI): *m/z* calcd for C<sub>54</sub>H<sub>33</sub>N<sub>3</sub>O<sub>9</sub>: 890.2109, [M+Na]<sup>+</sup>; found: 890.2116, [M+Na]<sup>+</sup>.

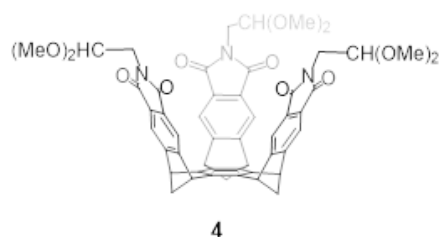

**Compound 4.** To a suspension of *tris*-anhydride<sup>2</sup> (15.8 mg, 0.025 mmol) in anhydrous toluene (2.00 ml) was added 2,2-dimethoxyethan-1-amine (10.5 mg, 0.1 mmol) and dry pyridine (39.5 mg, 0.5 mmol). The mixture was heated to 120 °C for 12 h. Next, the mixture was concentrated under reduced pressure to give residue which was purified by column chromatography (SiO<sub>2</sub>, CH<sub>3</sub>OH:CH<sub>2</sub>Cl<sub>2</sub> = 1:50) to give compound **4** (13.4 mg, 60%) as a white solid. <sup>1</sup>H NMR (400 MHz, CDCl<sub>3</sub>): δ (ppm) 7.54 (s, 6H), 4.62 (s, 3H), 4.52 (s, 6H), 3.64 (d, *J* = 5.8 Hz, 6H), 3.26 (s, 18H), 2.61 (s, 6H). <sup>13</sup>C NMR (150 MHz, CDCl<sub>3</sub>): δ (ppm) 167.87, 156.61, 137.89, 130.57, 116.16, 99.81, 65.78, 52.94, 49.12, 38.51. HRMS (ESI): *m/z* calcd for C<sub>51</sub>H<sub>45</sub>N<sub>3</sub>NaO<sub>12</sub>: 914.2895, [M+Na]<sup>+</sup>; found: 914.2890, [M+Na]<sup>+</sup>.

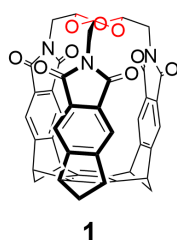

**Capsularene 1.** Compound **4** (13.4 mg, 0.015 mmol) was dissolved in 4 ml of CH<sub>2</sub>Cl<sub>2</sub>:TFA = 1:1, and the mixture stirred at a room temperature for 24 h. The solvent was removed under reduced pressure and the residual oil triturated with MeOH, and then 20% Et<sub>2</sub>O in hexane to give the capsularene **1** (11.3 mg, 99%) as a white solid. <sup>1</sup>H NMR (600 MHz, CDCl<sub>3</sub>): δ (ppm) 7.48 (s, 6H), 5.06 (s, 3H), 4.47 (s, 6H), 3.94 (s, 6H), 2.68 (s, 6H). <sup>1</sup>H NMR (700 MHz, CD<sub>2</sub>Cl<sub>2</sub>) δ 7.45 (s, 6H), 5.09 (s, 3H), 4.53 (s, 6H), 3.85 (d, *J* = 1.4 Hz, 6H), 2.70 (dd, *J* = 3.1, 1.5 Hz, 6H). <sup>13</sup>C NMR (175 MHz, CD<sub>2</sub>Cl<sub>2</sub>): δ (ppm) 166.30, 157.14, 141.58, 129.85, 116.37, 99.83, 61.63, 49.39, 38.96. HRMS (ESI): *m/z* calcd for C<sub>45</sub>H<sub>27</sub>N<sub>3</sub>NaO<sub>9</sub>: 776.1640, [M+Na]<sup>+</sup>; found: 776.1675, [M+Na]<sup>+</sup>.

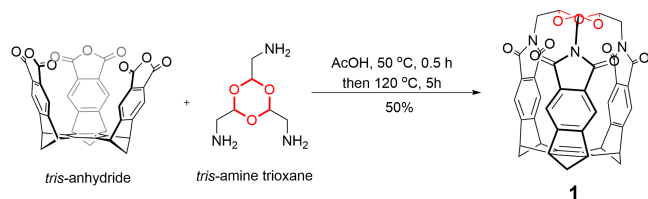

**Capsularene 1 via nucleophilic acyl substitution.** To a suspension of *tris*-anhydride (12.6 mg, 0.02 mmol) in AcOH (2 ml) and under a nitrogen atmosphere, *tris*-amino trioxane (((2*s*,4*s*,6*s*)-1,3,5-trioxane-2,4,6-triyl)trimethanamine) (3.6 mg, 0.02 mmol) was added. The reaction mixture was stirred in a sealed vial at 50 °C for 30 min, followed by an increase in temperature to 120 °C for 5 h. The reaction was cooled to room temperature, the solvent removed under reduced pressure and **1** was purified by flash column chromatography (SiO<sub>2</sub>, hexane:CH<sub>3</sub>CO<sub>2</sub>Et = 2:1 followed by CH<sub>2</sub>Cl<sub>2</sub>:CH<sub>3</sub>OH:NH<sub>3</sub>(aq) = 100:2.5:1). The solid product was finally triturated with CH<sub>3</sub>OH (1 ml) to give **1** as a white solid (7.5 mg, 50%).

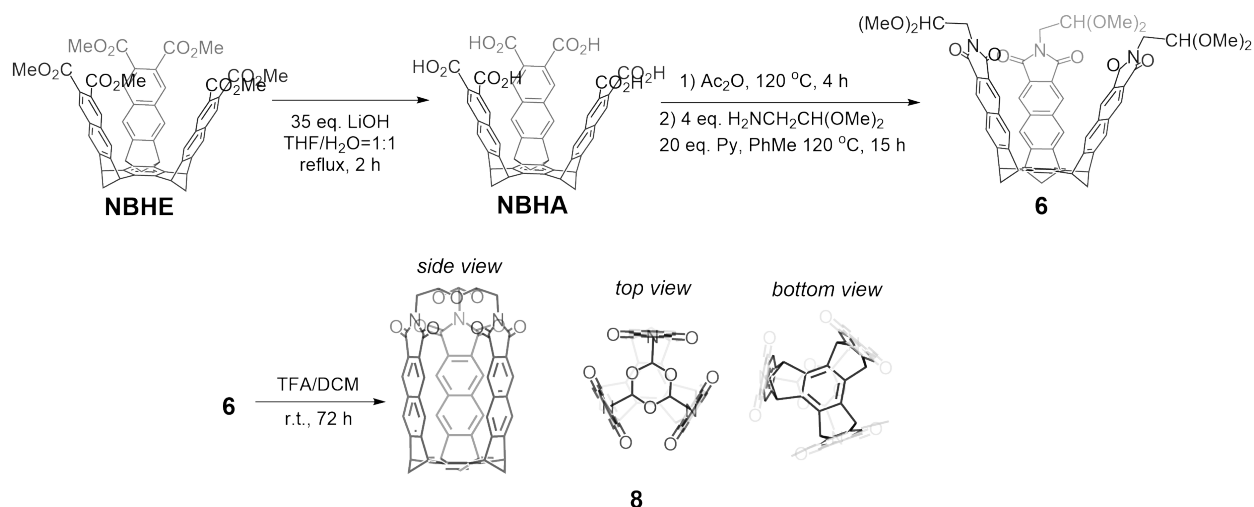

**Scheme S1.** Preparation of capsularene **8** from NBHE.<sup>3</sup>

**(6*R*,7*S*,14*R*,15*S*,22*R*,23*S*)-6,7,14,15,22,23-Hexahydro-6,23:7,14:15,22-trimethanoanthra[2,3-*j*]heptaphene-2,3,10,11,18,19-hexacarboxylic acid (NBHA).** NBHE<sup>3</sup> (Hexamethyl (6*R*,7*S*,14*R*,15*S*,22*R*,23*S*)-6,7,14,15,22,23-hexahydro-6,23:7,14:15,22-trimethanoanthra[2,3-*j*]heptaphene-2,3,10,11,18,19-hexacarboxylate) (200 mg, 0.218 mmol) was dissolved in THF (12 ml) and placed in a round bottom flask to which 12 ml of aqueous 0.6 M LiOH was added. The reaction mixture was refluxed for 2 h and then cooled down to room temperature followed by the removal of THF solvent under reduced pressure. The remaining water solution was transferred to a 50 mL Erlenmeyer tube and acidified with aqueous 3 M HCl to pH=0-1, at which point a pale yellow precipitate of the product formed. The solid was isolated by centrifugation, resuspended in aqueous 0.3 M HCl, and then precipitated again using centrifugation (repeat the process three times). Finally, lyophilization of the precipitate gave pure **NBHA** (169 mg, 93%) as a white solid. <sup>1</sup>H NMR (850 MHz, DMSO-*d*<sub>6</sub>): δ (ppm) 12.84 (br s, 6H), 7.97 (s, 6H), 7.77 (s, 6H), 4.77 (s, 6H), 2.52 (m, 3H), 2.44 (m, 3H). <sup>13</sup>C NMR (213 MHz, DMSO-*d*<sub>6</sub>): δ (ppm) 168.6, 149.6, 137.6, 131.7, 129.1, 128.5, 119.5, 63.6, 47.9. HRMS (ESI): *m/z* calcd for C<sub>51</sub>H<sub>30</sub>O<sub>12</sub>: 833.1505, [M-H]<sup>-</sup>, found: 833.1664 [M-H]<sup>-</sup>.

**(6*R*,7*S*,15*R*,16*S*,24*R*,25*S*)-2,11,20-tris(2,2-dimethoxyethyl)-6,7,15,16,24,25-hexahydro-1*H*-6,25:7,15:16,24-trimethanotrinaphtho[2,3-*f*:8,9-*f'*:14,15-*f''*]trisoindole-1,3,10,12,19,21(2*H*,11*H*,20*H*)-hexaone **6**.** NBHA (33 mg, 0.0384 mmol) was added to 4 ml of acetic anhydride in an oven-dried vial, purged with N<sub>2</sub> for 5 min, sealed and then heated at 120 °C for 3 h. Upon cooling the reaction mixture to room temperature, acetic anhydride was removed under reduced pressure and the solid kept under the stream of N<sub>2</sub> for 10 min to ensure complete removal of the solvent. Upon suspending this solid in anhydrous toluene (4 ml), 2,2-dimethoxyethan-1-amine (16.2 mg, 0.154 mmol) and dry pyridine (61 mg, 0.77 mmol) were added. The mixture was heated at 120 °C for 15 h. The solvent was removed under reduced pressure and the resulting residue purified by column chromatography (SiO<sub>2</sub>, CH<sub>3</sub>OH:CH<sub>2</sub>Cl<sub>2</sub> = 1:50) to give **6** (29 mg, 73%) as a white solid. <sup>1</sup>H NMR (850 MHz, CDCl<sub>3</sub>): δ (ppm) 8.03 (s, 6H), 7.67 (s, 6H), 4.71 (t, 3H, *J*=5.9 Hz), 4.61 (s, 6H), 3.76 (d, *J*=5.9 Hz, 6H), 3.31 (s, 18H), 2.66 (m, 3H), 2.61 (m, 3H). <sup>13</sup>C NMR (213 MHz, CDCl<sub>3</sub>): δ (ppm) 167.8, 150.4, 137.8, 134.7, 127.3, 124.0, 121.3, 100.0, 64.0, 53.2, 48.7, 38.9. HRMS (ESI): *m/z* calcd for C<sub>63</sub>H<sub>51</sub>N<sub>3</sub>O<sub>12</sub>: 1059.3711, [M+NH<sub>4</sub>]<sup>+</sup>; found: 1059.3811, [M+NH<sub>4</sub>]<sup>+</sup>.

**Capsularene 8.** Compound **6** (15.0 mg, 0.0144 mmol) was dissolved in 4 ml of  $\text{CH}_2\text{Cl}_2$ :TFA = 1:1, and the mixture stirred at a room temperature for 72 h. The solvent was removed under reduced pressure and the residual oil triturated with MeOH, and then 20% Et<sub>2</sub>O in hexane to give compound **8** (12.4 mg, 95%) as a white solid. <sup>1</sup>H NMR (850 MHz, CDCl<sub>3</sub>):  $\delta$  (ppm) 7.98 (s, 6H), 7.47 (s, 6H), 5.19 (s, 3H), 4.52 (s, 6H), 4.07 (s, 6H), 2.70 (m, 3H), 2.64 (m, 3H). <sup>1</sup>H NMR (850 MHz, 10% CF<sub>3</sub>CO<sub>2</sub>H in CDCl<sub>3</sub>)  $\delta$  8.13 (s, 6H), 7.61 (s, 6H), 5.26 (s, 3H), 4.59 (s, 6H), 4.06 (s, 6H), 2.77 (m, 3H), 2.71 (m, 3H). <sup>13</sup>C NMR (213 MHz, 10% CF<sub>3</sub>CO<sub>2</sub>H in CDCl<sub>3</sub>):  $\delta$  (ppm) 169.01, 151.73, 141.25, 134.13, 125.11, 125.01, 122.05, 99.32, 59.67, 48.62, 39.49. HRMS (ESI):  $m/z$  calcd for C<sub>57</sub>H<sub>33</sub>N<sub>3</sub>O<sub>9</sub>: 921.2555, [M+NH<sub>4</sub>]<sup>+</sup>; found: 921.2553, [M+ NH<sub>4</sub>]<sup>+</sup>.

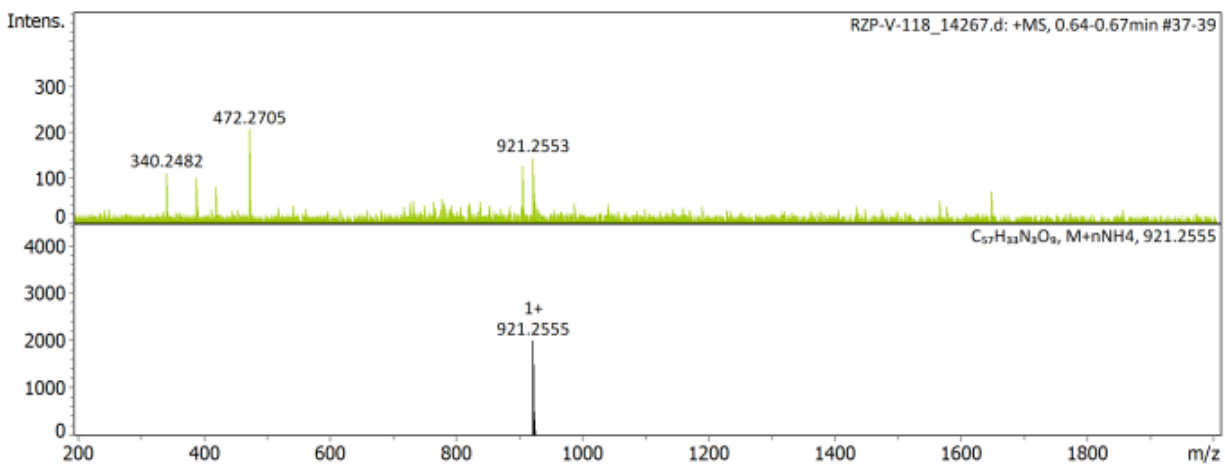

Experimental HRMS (ESI-TOF) spectrum and (bottom) simulated spectra of capsularene **8**.

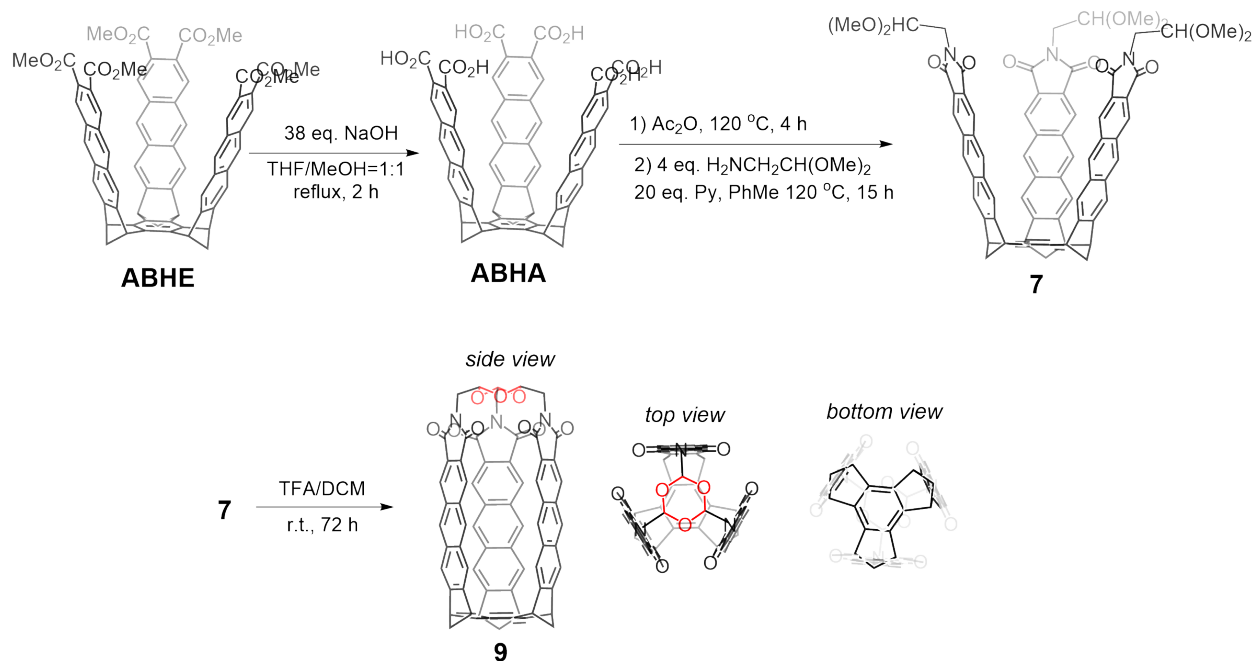

**Scheme S2.** Preparation of capsularene **9** from ABHE.<sup>3</sup>

**(7R,8S,17R,18S,27R,28S)-7,8,17,18,27,28-hexahydro-7,28:8,17:18,27-trimethanotetraceno[2,3- $\Gamma$ ]nonaphene-2,3,12,13,22,23-hexacarboxylic acid (ABHA).** After ABHE<sup>3</sup> hexamethyl (7R,8S,17R,18S,27R,28S)-7,8,17,18,27,28-hexahydro-7,28:8,17:18,27-trimethanotetraceno[2,3- $\Gamma$ ]nonaphene-2,3,12,13,22,23-hexacarboxylate (70 mg, 0.0655 mmol) was dissolved in THF (1 ml), methanolic NaOH (2.5 M, 1 ml) was added. The reaction mixture was refluxed for 2 h. At the beginning, the reaction mixture was a homogenous solution but slowly turned into a suspension (bright yellow precipitate formed) as the reaction progressed. Upon cooling, water (4 ml) was added to render the precipitate into solution. Next, THF and MeOH were removed under reduced pressure. The remaining water solution was transferred to a 20 mL Fekin tube and acidified using aqueous 6 M HCl to pH=0-1, at which point slightly yellow precipitate of ABHA formed. The solid was isolated by centrifugation, then again resuspended in 5 ml of 0.1 M HCl, and precipitated again by centrifugation (repeat this process 3 times). Finally, lyophilization of the precipitate gave pure ABHA (61 mg, 95%) as a yellowish solid. <sup>1</sup>H NMR (850 MHz, DMSO-d<sub>6</sub>):  $\delta$  (ppm) 12.93 (br s, CO<sub>2</sub>H), 8.37 (s, 6H), 8.23 (s, 6H), 7.83 (s, 6H), 4.80 (s, 6H), 2.56 (m, 3H), 2.46 (m, 3H). <sup>13</sup>C NMR (213 MHz, DMSO-d<sub>6</sub>):  $\delta$  (ppm) 168.54, 147.52, 137.35, 131.85, 129.65, 129.47, 128.53, 126.78, 118.57, 62.23, 47.73. HRMS (ESI): *m/z* calcd for C<sub>63</sub>H<sub>36</sub>O<sub>12</sub>: 983.1180, [M-H]<sup>-</sup>, found: 983.1134 [M-H]<sup>-</sup>.

**Compound 7.** ABHA (16 mg, 16.84  $\mu$ mol) was added to 4 ml of acetic anhydride in an oven-dried vial, purged with N<sub>2</sub> for 5 min, sealed and heated at 120 °C for 3 h. Upon cooling the mixture to a room temperature, acetic anhydride was removed under reduced pressure and the remaining solid kept under a stream of N<sub>2</sub> for 10 min to ensure a complete removal of the solvent. Upon suspending the solid in anhydrous toluene (4 ml), 2,2-dimethoxyethan-1-amine (7 mg, 65.4  $\mu$ mol) and dry pyridine (26 mg, 0.327 mmol) were added. The mixture was heated at 120 °C for 24 h. The solvent was removed under reduced pressure and the resulting residue purified by column chromatography (SiO<sub>2</sub>, CH<sub>3</sub>OH:CH<sub>2</sub>Cl<sub>2</sub> = 1:50) to give compound **7** (14.4 mg, 74%) as a white solid. <sup>1</sup>H NMR (850 MHz, CDCl<sub>3</sub>):  $\delta$  (ppm) 8.27 (s, 6H), 8.24 (s, 6H), 7.68 (s, 6H), 4.74 (t, 3H, *J*=5.7 Hz), 4.64 (s, 6H), 3.81 (d, *J*=5.7 Hz, 6H), 3.33 (s, 18H), 2.69 (m, 3H), 2.59 (m, 3H). <sup>13</sup>C NMR (213 MHz, CDCl<sub>3</sub>):  $\delta$  (ppm) 167.5, 148.1, 137.6, 132.8, 131.7, 129.0, 126.0, 125.4, 118.9, 99.9, 62.4, 53.1, 48.5, 39.0. HRMS (ESI): *m/z* calcd for C<sub>75</sub>H<sub>57</sub>N<sub>3</sub>O<sub>12</sub>: 1209.4280, [M+NH<sub>4</sub>]<sup>+</sup>; found: 1209.4272, [M+ NH<sub>4</sub>]<sup>+</sup>.

**Capsularene 9.** Compound **7** (10.0 mg, 8.4  $\mu$ mol) was dissolved in in 4 ml of CH<sub>2</sub>Cl<sub>2</sub>:TFA = 1:1, and the reaction mixture stirred at a room temperature for 100 h. The solvent was removed under reduced pressure and the residue triturated with MeOH, and then 20% Et<sub>2</sub>O in hexane to give compound **8** (8 mg, 90%) as a white solid. <sup>1</sup>H NMR (850 MHz, TFA/CDCl<sub>3</sub>=3:7, 298 K):  $\delta$  (ppm) 8.46 (s, 6H), 8.19 (s, 6H), 7.56 (s, 6H), 5.34 (s, 3H), 4.60 (s, 6H), 4.14 (s, 6H), 2.77 (m, 3H), 2.69 (m, 3H). <sup>13</sup>C NMR (213 MHz, TFA/CDCl<sub>3</sub>=3:7, 298 K):  $\delta$  (ppm) 169.13, 147.51, 140.90, 132.88, 130.99, 129.49, 127.48, 123.55, 119.66, 99.40, 58.38, 48.65, 39.88. HRMS (ESI): *m/z* calcd for C<sub>69</sub>H<sub>39</sub>N<sub>3</sub>O<sub>9</sub>: 1054.2759, [M+H]<sup>+</sup>; found: 1054.2773, [M+ H]<sup>+</sup>.

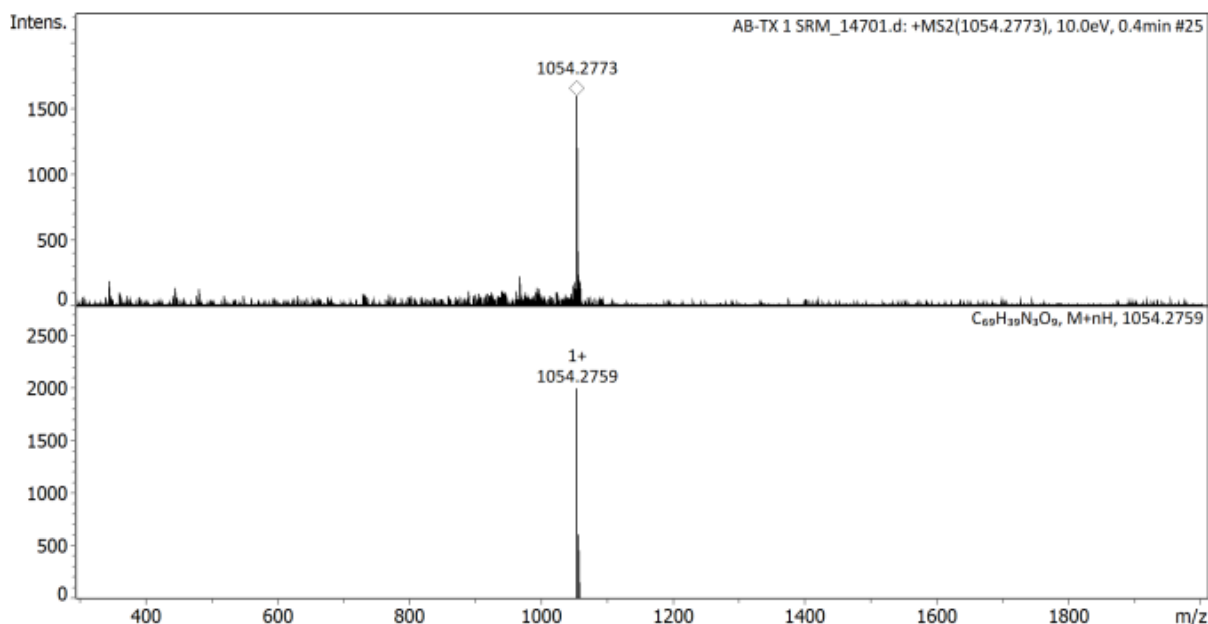

(Top) Experimental HRMS (ESI-TOF) spectrum and (bottom) simulated spectra of capsularene **9**.

## References

- (1) Shi, G.; Gadhe, C. G.; Park, S. W.; Kim, K. S.; Kang, J.; Seema, H.; Singh, N. J.; Cho, S. *J. Org. Lett.* **2014**, *16* (2), 334–337. <https://doi.org/10.1021/ol402819m>.
- (2) Border, S. E.; Pavlović, R. Z.; Zhiquan, L.; Badjić, J. D. *J. Am. Chem. Soc.* **2017**, *139* (51). <https://doi.org/10.1021/jacs.7b11960>.
- (3) Lei, Z.; Gunther, M. J.; Liyana Gunawardana, V. W.; Pavlović, R. Z.; Xie, H.; Zhu, X.; Keenan, M.; Riggs, A.; Badjić, J. D. *Chem. Commun.* **2020**, *3*, 10243–10246. <https://doi.org/10.1039/d0cc04650g>.



# Spectroscopic Characterizations

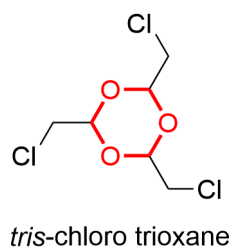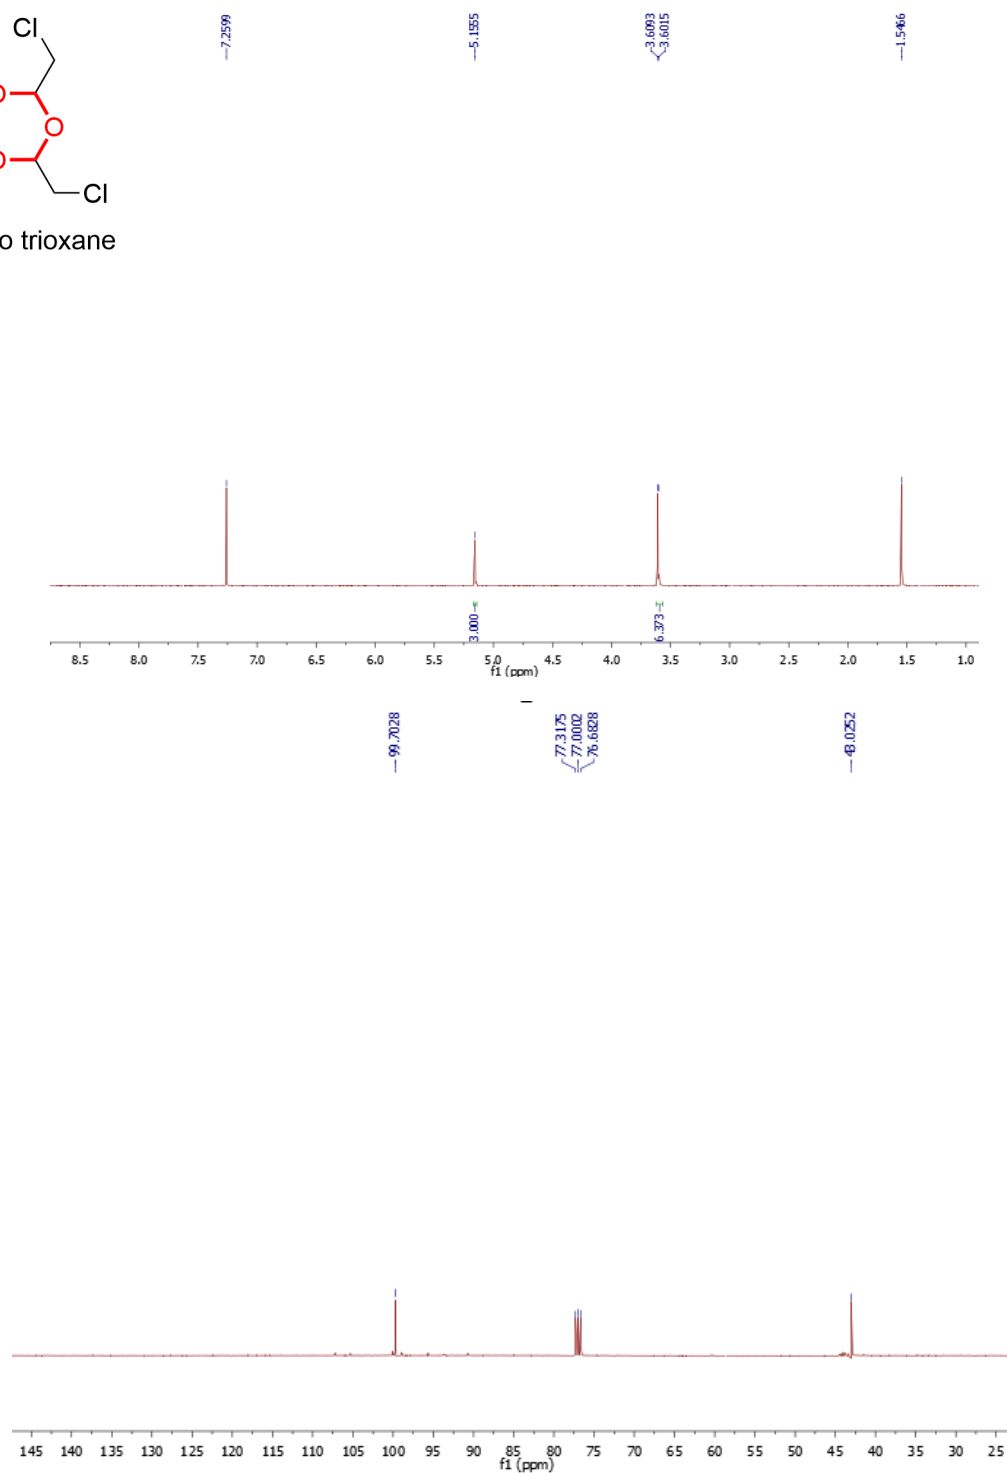

**Figure S1.** <sup>1</sup>H and <sup>13</sup>C NMR spectra (600/150 MHz, CDCl<sub>3</sub>, 298 K) of *tris*-chloro trioxane.

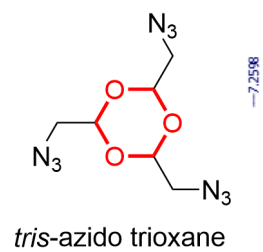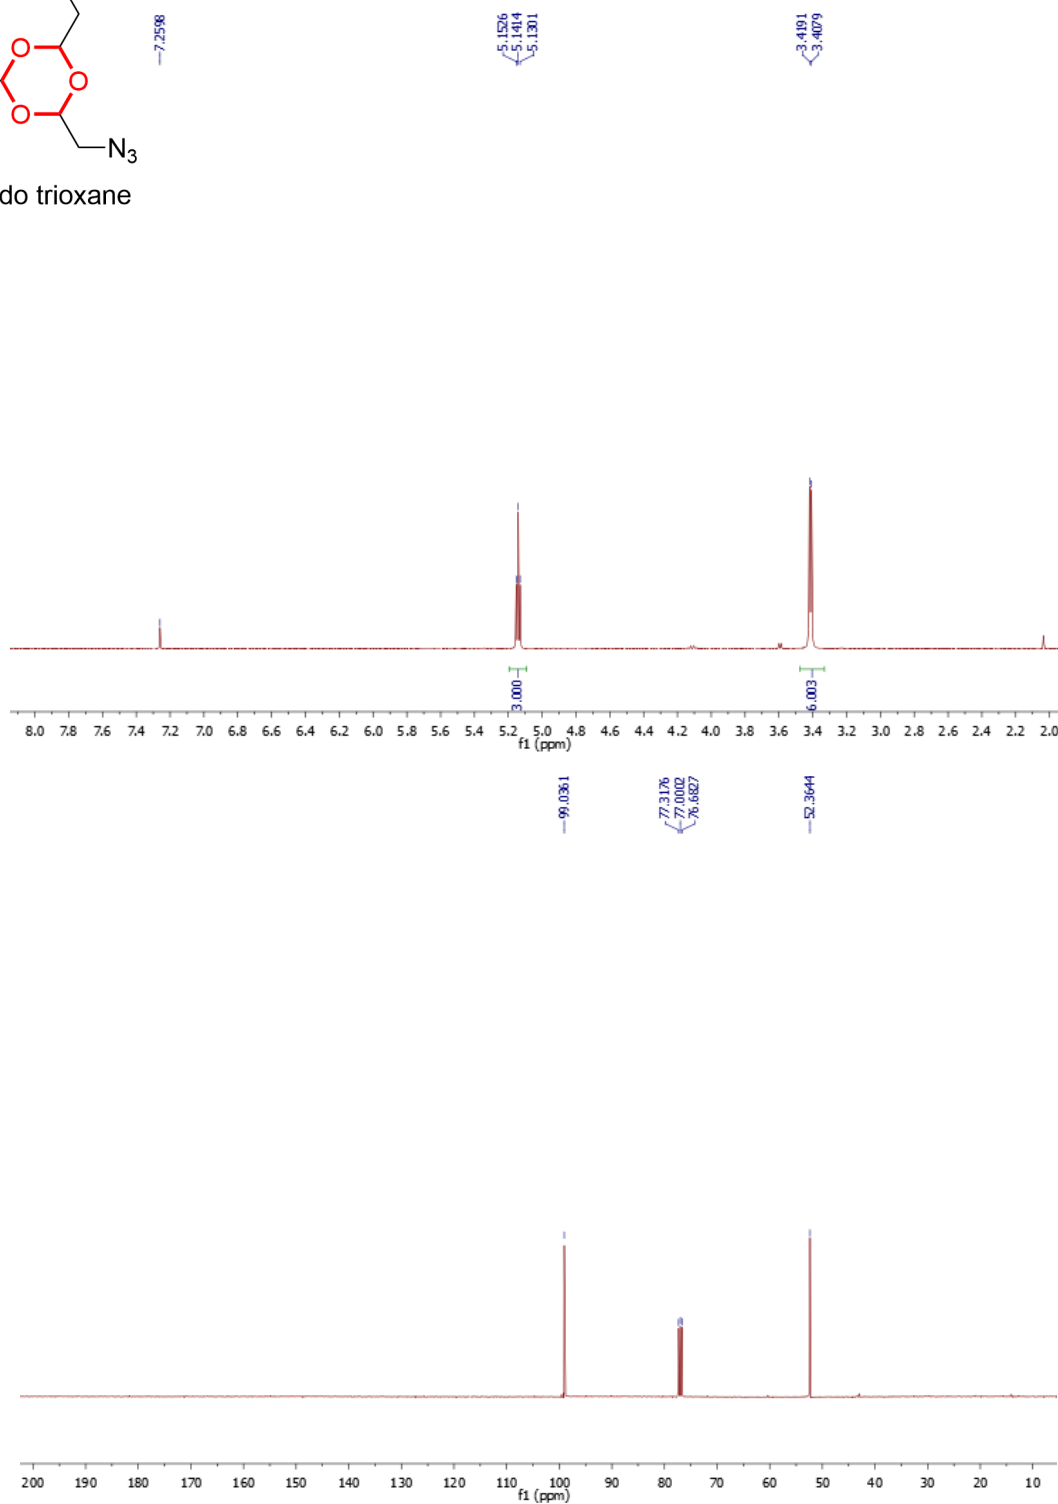

**Figure S2.**  $^1\text{H}$  and  $^{13}\text{C}$  NMR spectra (400/100 MHz,  $\text{CDCl}_3$ , 298 K) of *tris*-azido trioxane.

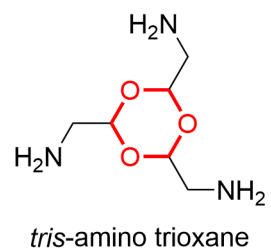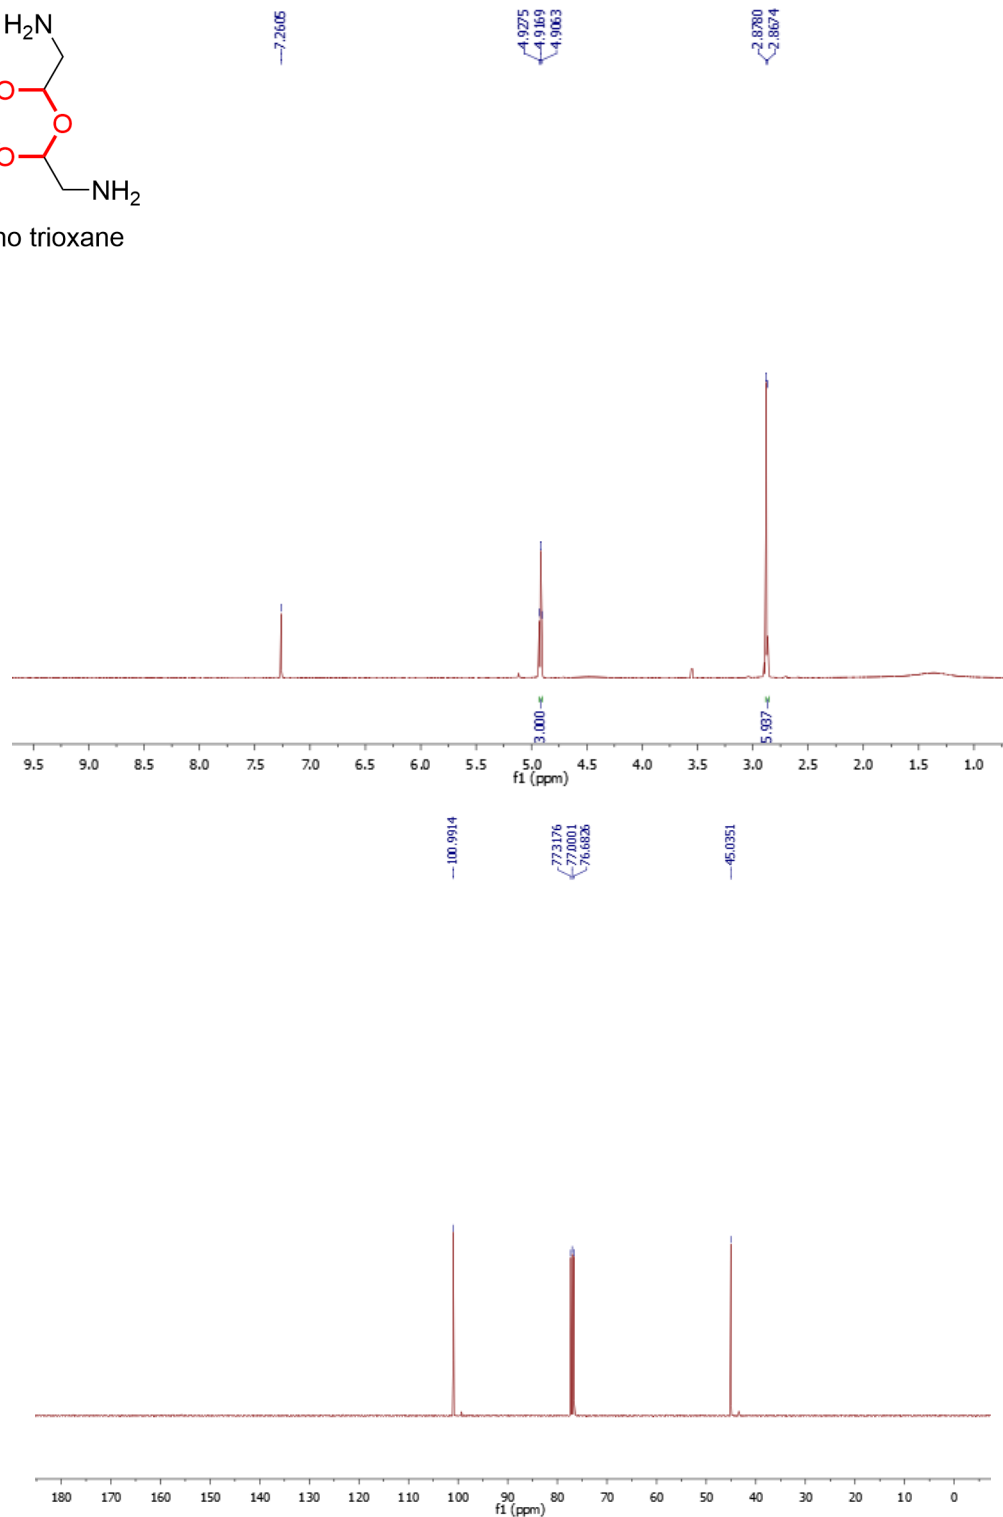

**Figure S3.**  $^1\text{H}$  and  $^{13}\text{C}$  NMR spectra (400/100 MHz, CDCl<sub>3</sub>, 298 K) of *tris*-amino trioxane.

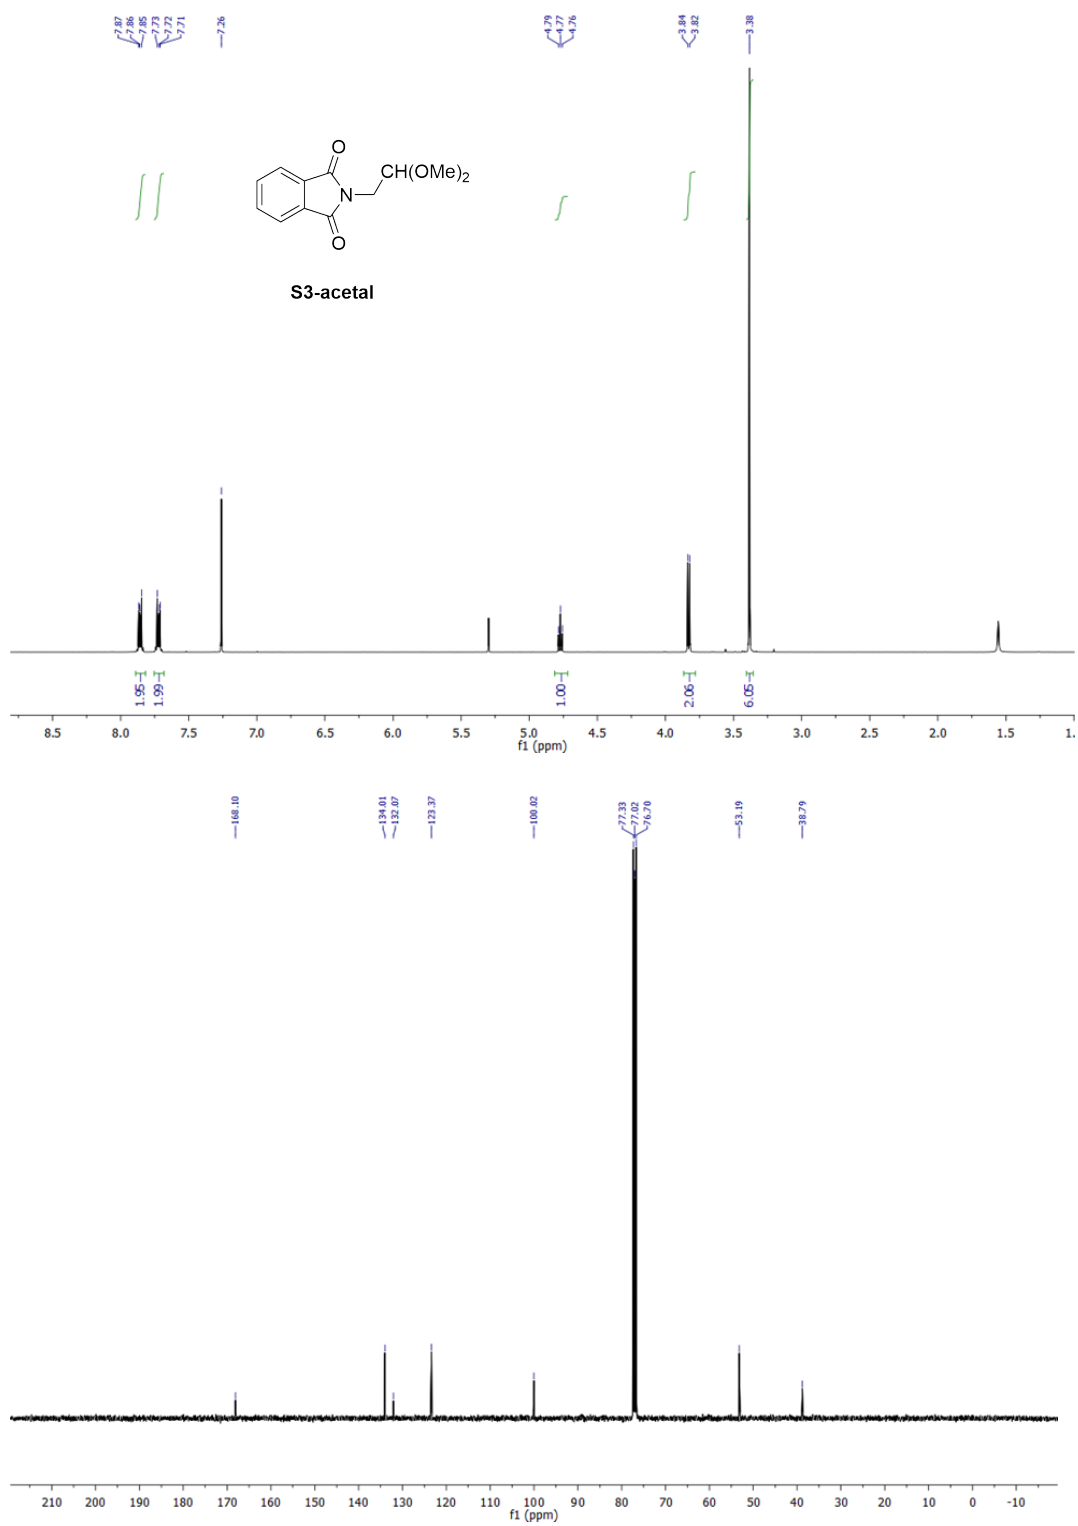

**Figure S4.** <sup>1</sup>H and <sup>13</sup>C NMR spectra (400/100 MHz, CDCl<sub>3</sub>, 298 K) of 2-(2,2-dimethoxyethyl)isoindoline-1,3-dione.

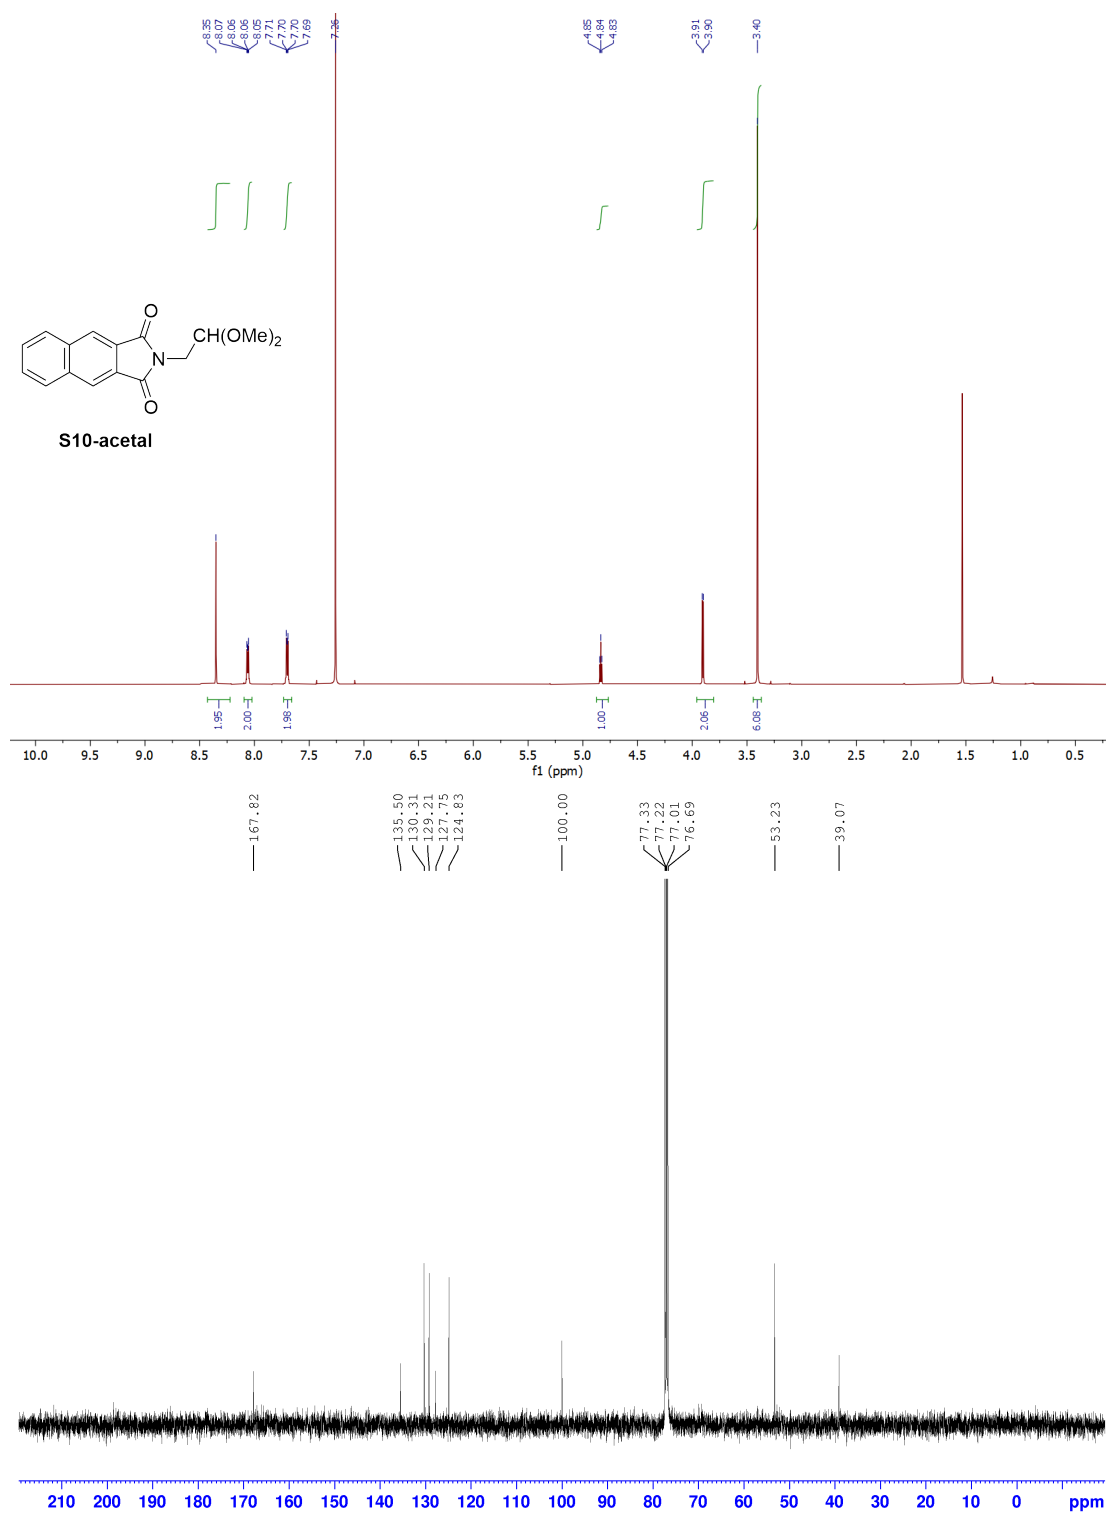

**Figure S5.** <sup>1</sup>H and <sup>13</sup>C NMR spectra (400/100 MHz, CDCl<sub>3</sub>, 298 K) of 2-(2,2-dimethoxyethyl)-1*H*-benzo[*f*]isoindole-1,3(2*H*)-dione.

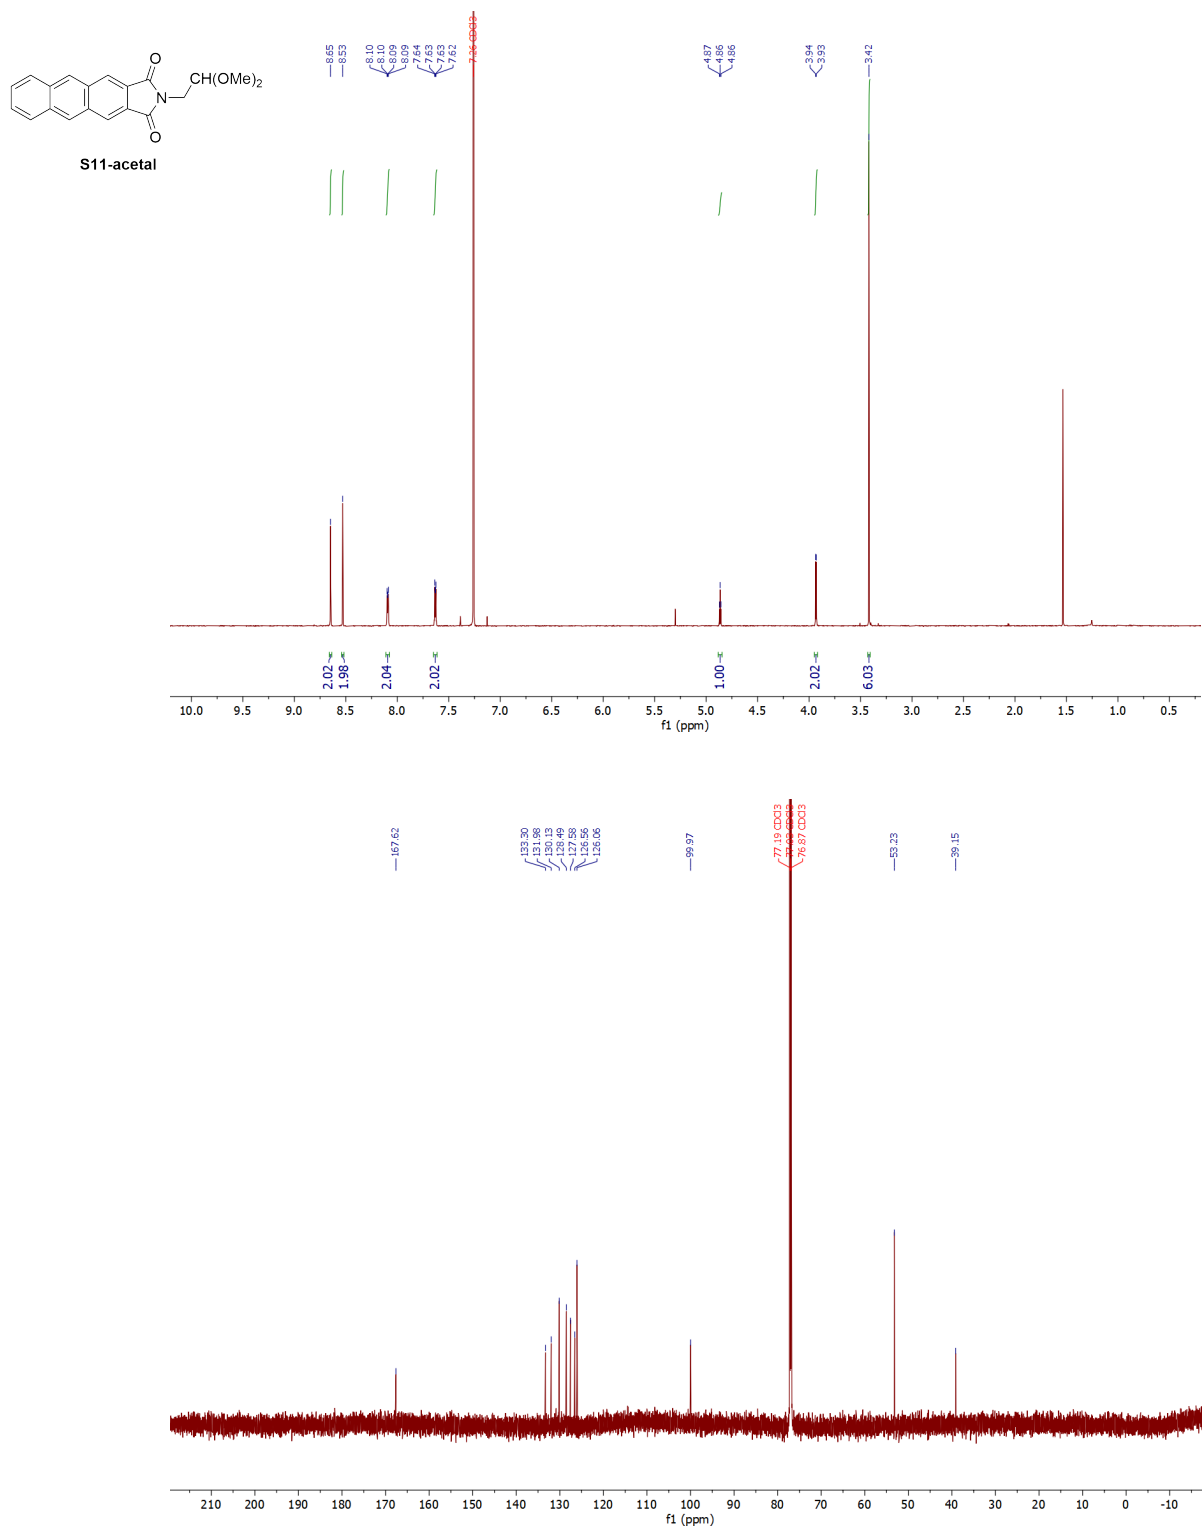

**Figure S6.** <sup>1</sup>H and <sup>13</sup>C NMR spectra (400/100 MHz, CDCl<sub>3</sub>, 298 K) of 2-(2,2-dimethoxyethyl)-1*H*-naphtho[2,3-*f*]isoindole-1,3(2*H*)-dione.

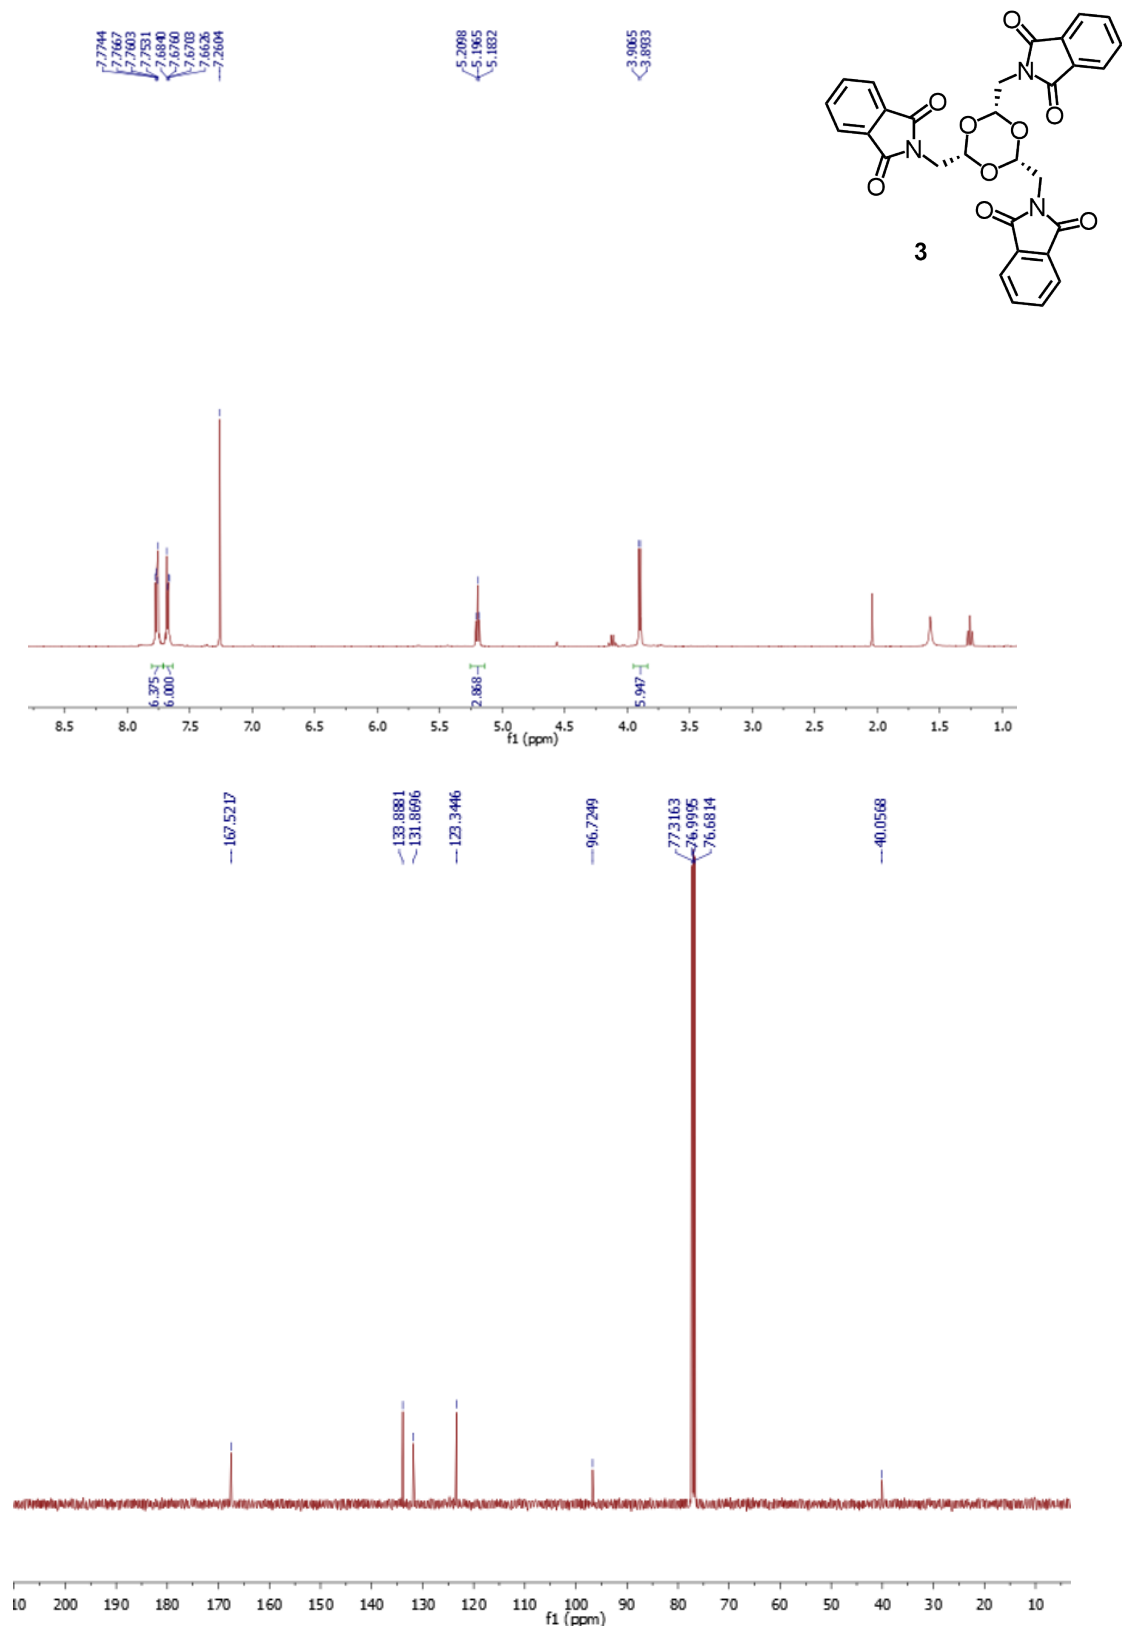

Figure S7. <sup>1</sup>H and <sup>13</sup>C NMR spectra (400/100 MHz, CDCl<sub>3</sub>, 298 K) of compound 3.

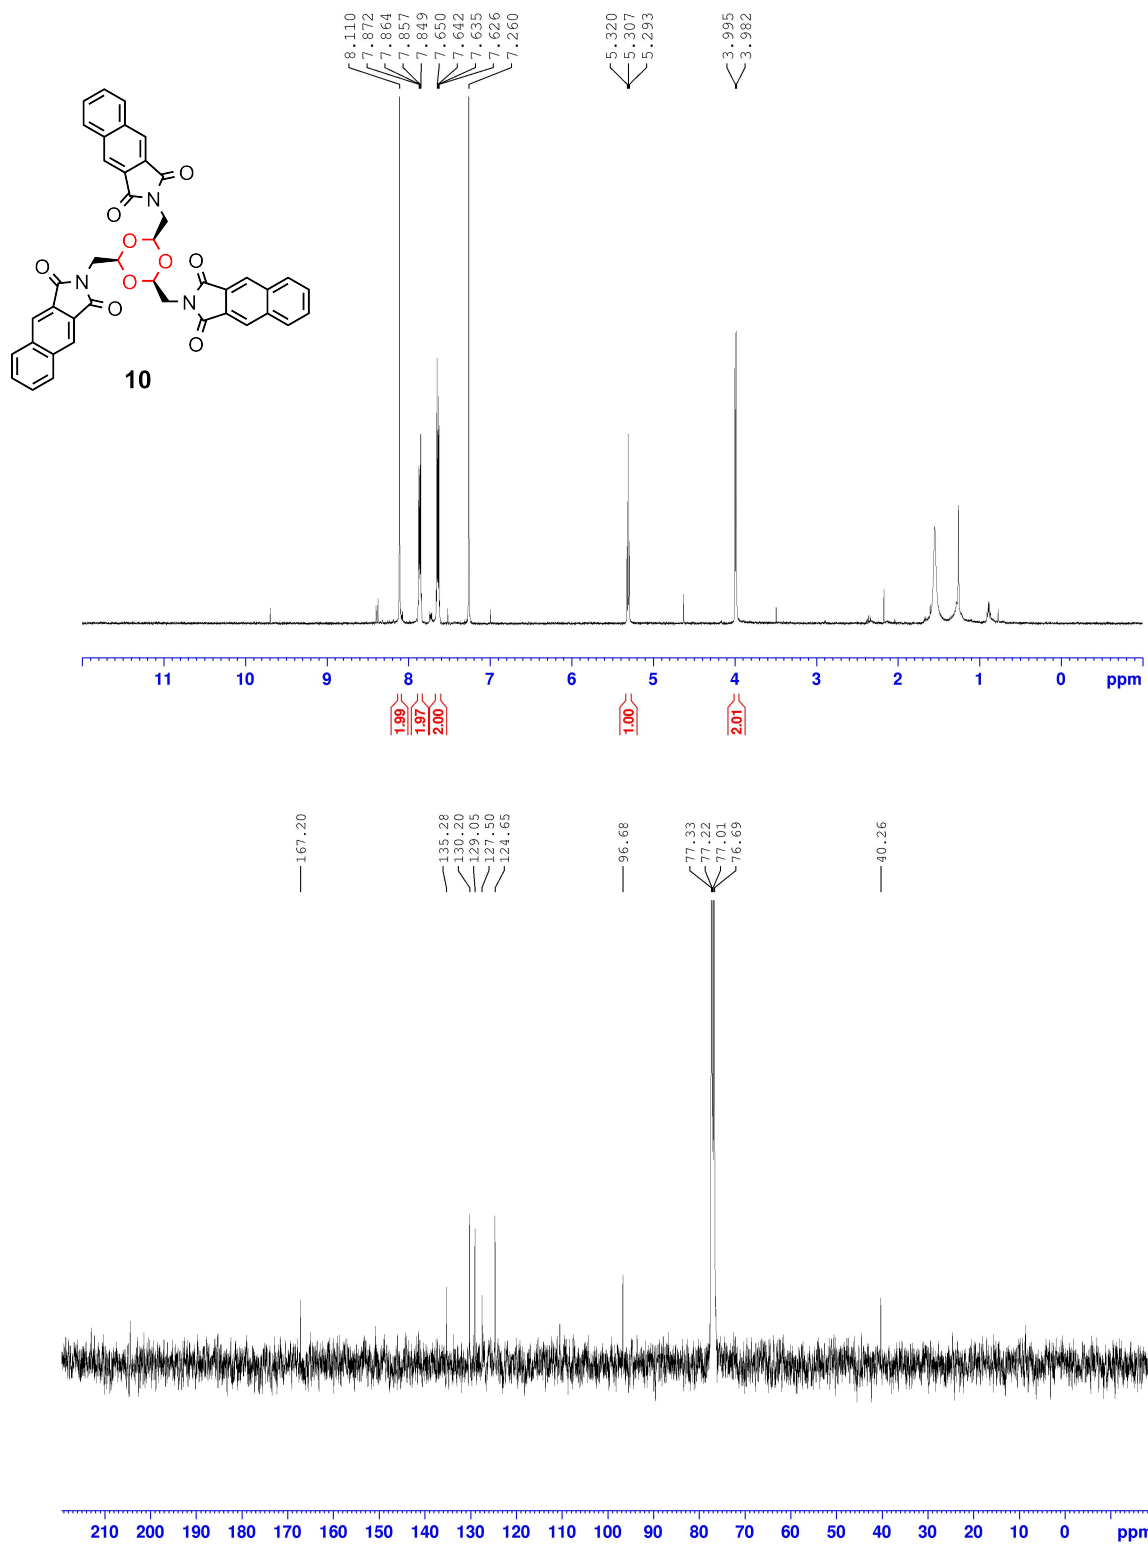

**Figure S8.** <sup>1</sup>H and <sup>13</sup>C NMR spectra (400/100 MHz, CDCl<sub>3</sub>, 298 K) of compound **10**.





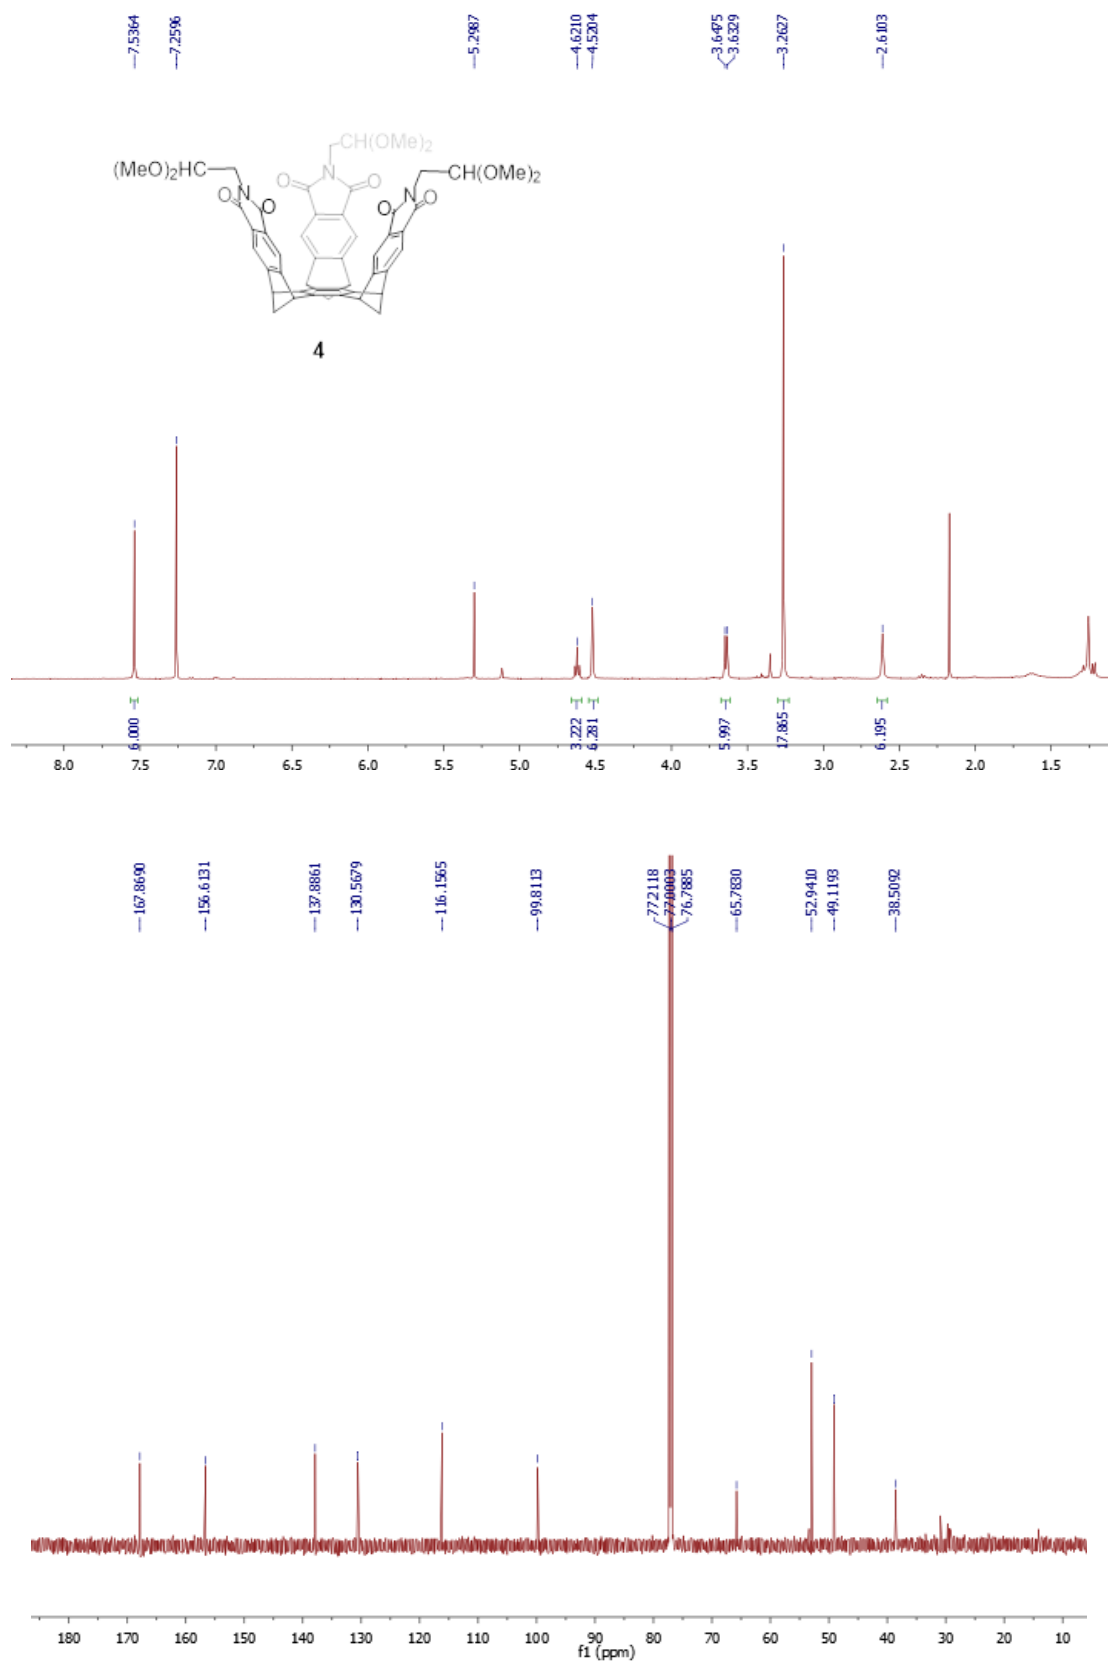

**Figure S10.**  $^1\text{H}$  and  $^{13}\text{C}$  NMR spectra (600/150 MHz,  $\text{CDCl}_3$ , 298 K) of compound 4.

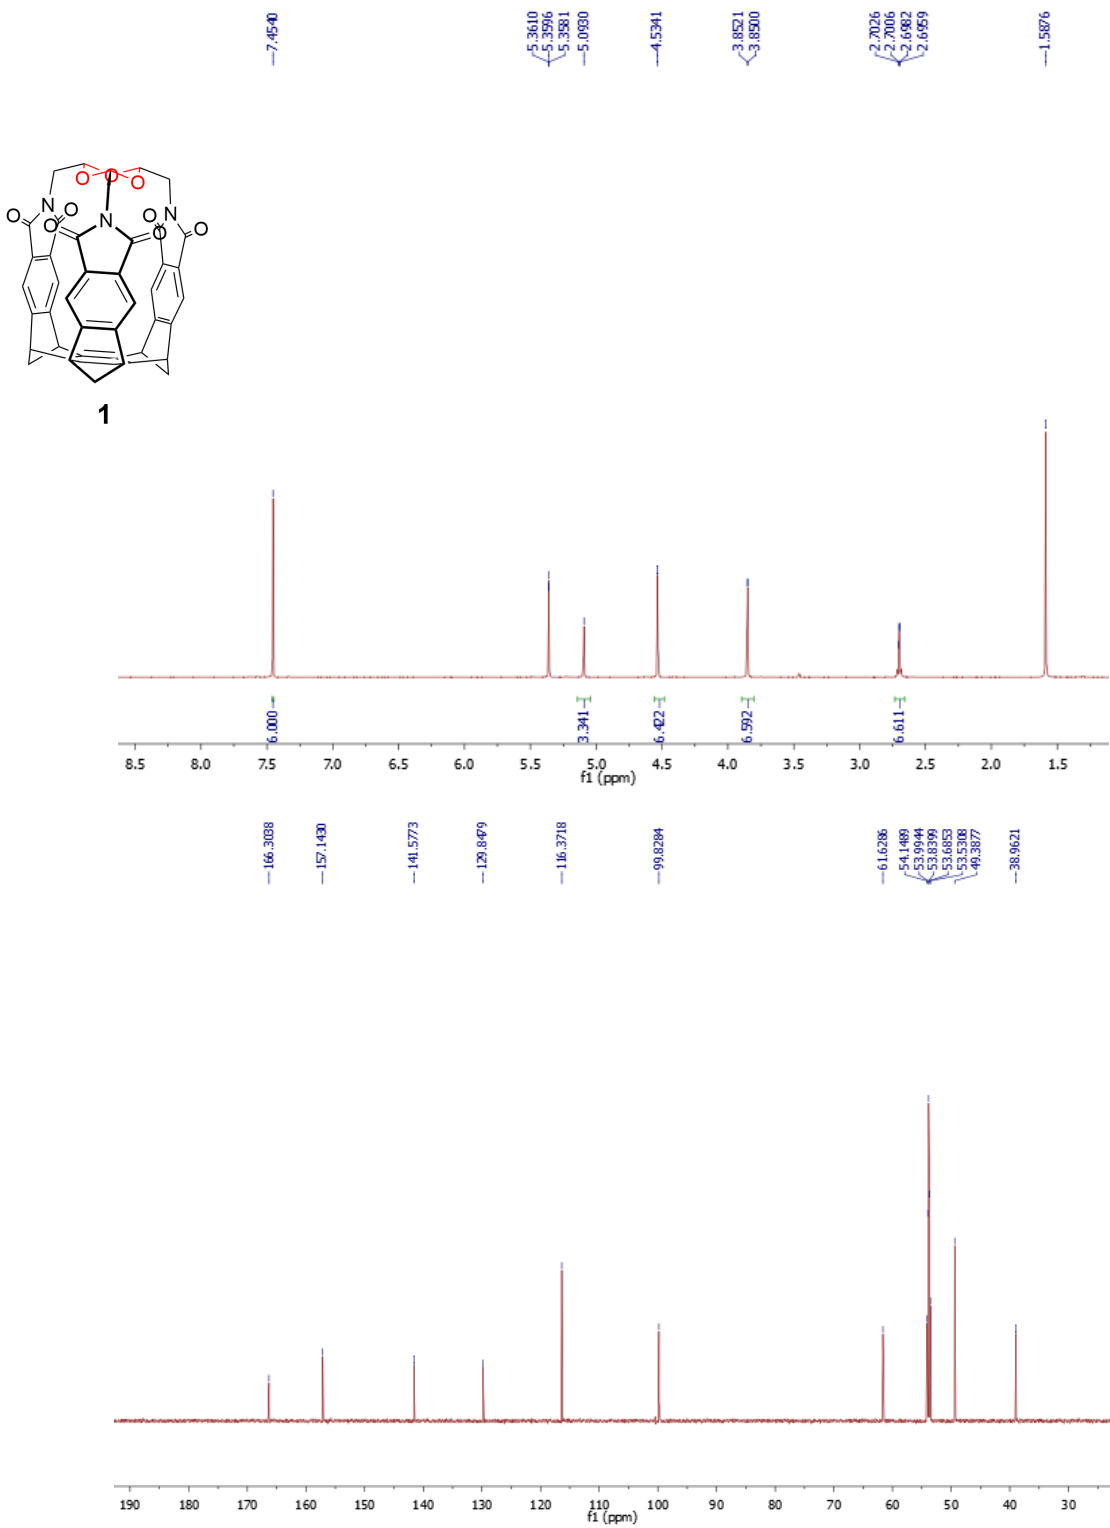

**Figure S11.**  $^1\text{H}$  and  $^{13}\text{C}$  NMR spectra (700/175 MHz, 298 K) of capsularene **1** in  $\text{CD}_2\text{Cl}_2$ .

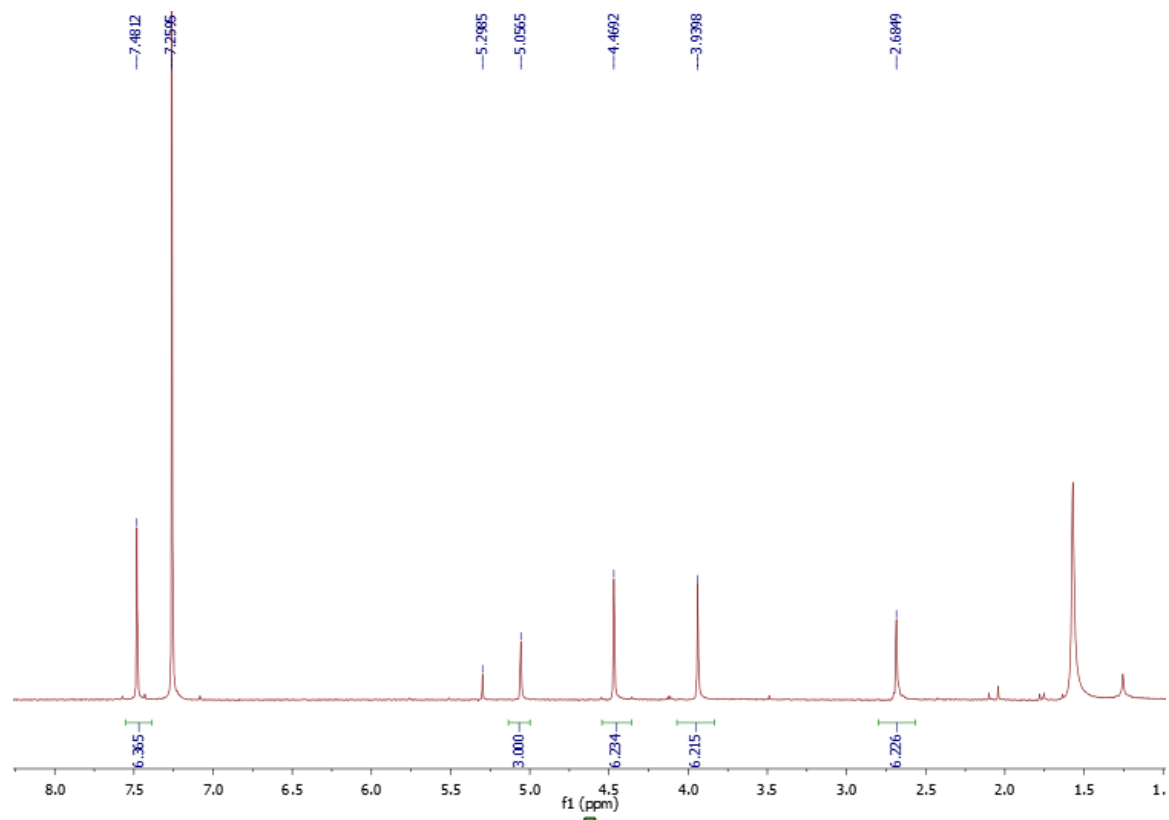

**Figure S12.** <sup>1</sup>H NMR spectrum (600 MHz, 298 K) of capsularene **1** in CDCl<sub>3</sub>.

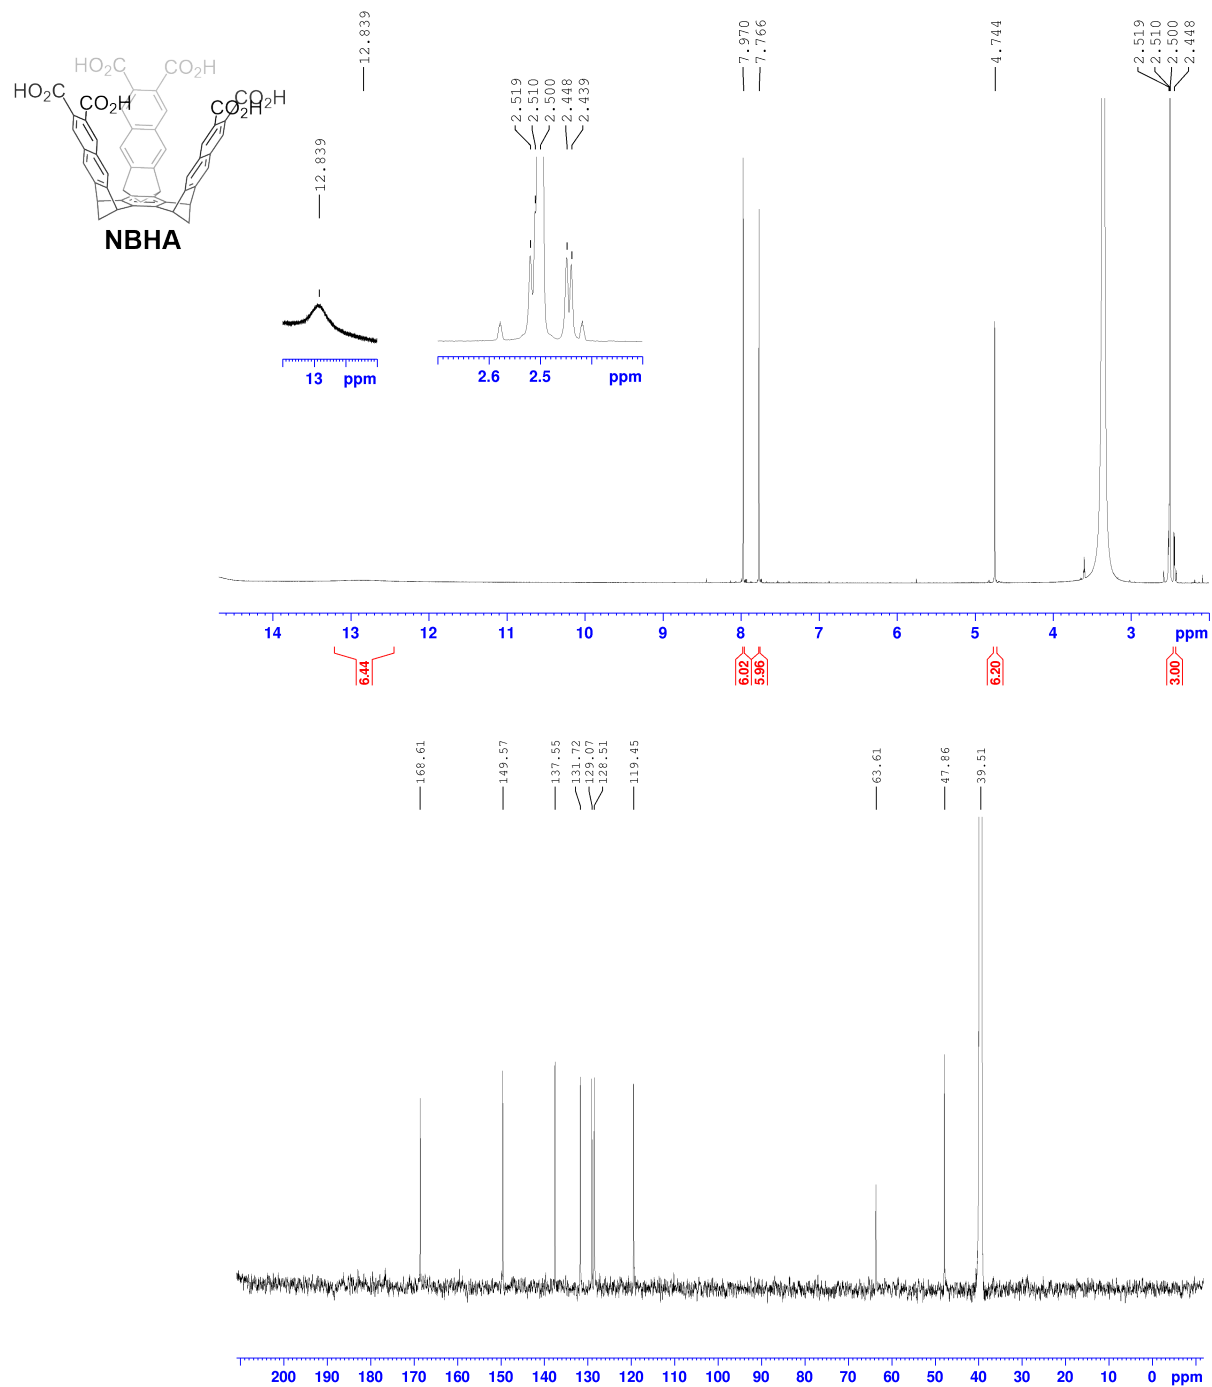

**Figure S13.** <sup>1</sup>H and <sup>13</sup>C NMR spectra (DMSO-d<sub>6</sub>, 850/213 MHz, 298 K) of NBHA.

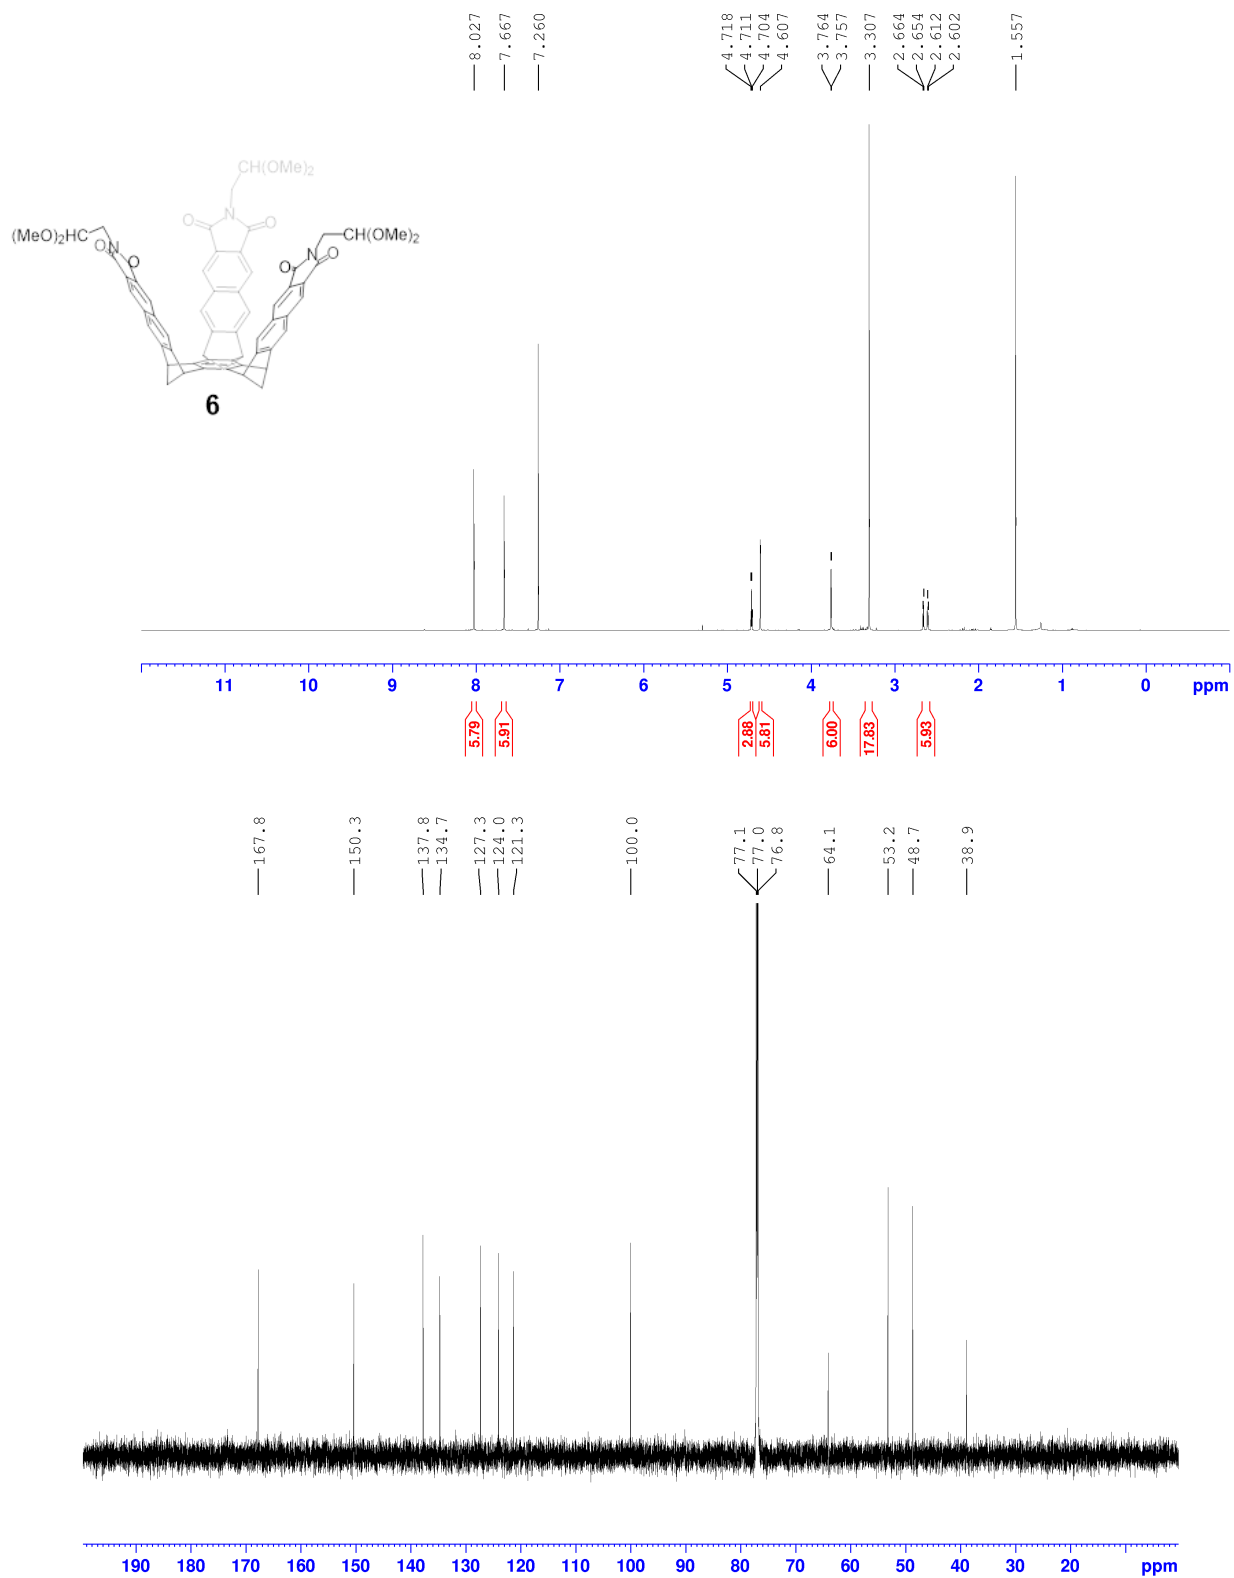

**Figure S14.** <sup>1</sup>H and <sup>13</sup>C NMR spectra (850/213 MHz, 298 K) of compound **6** in CDCl<sub>3</sub>.

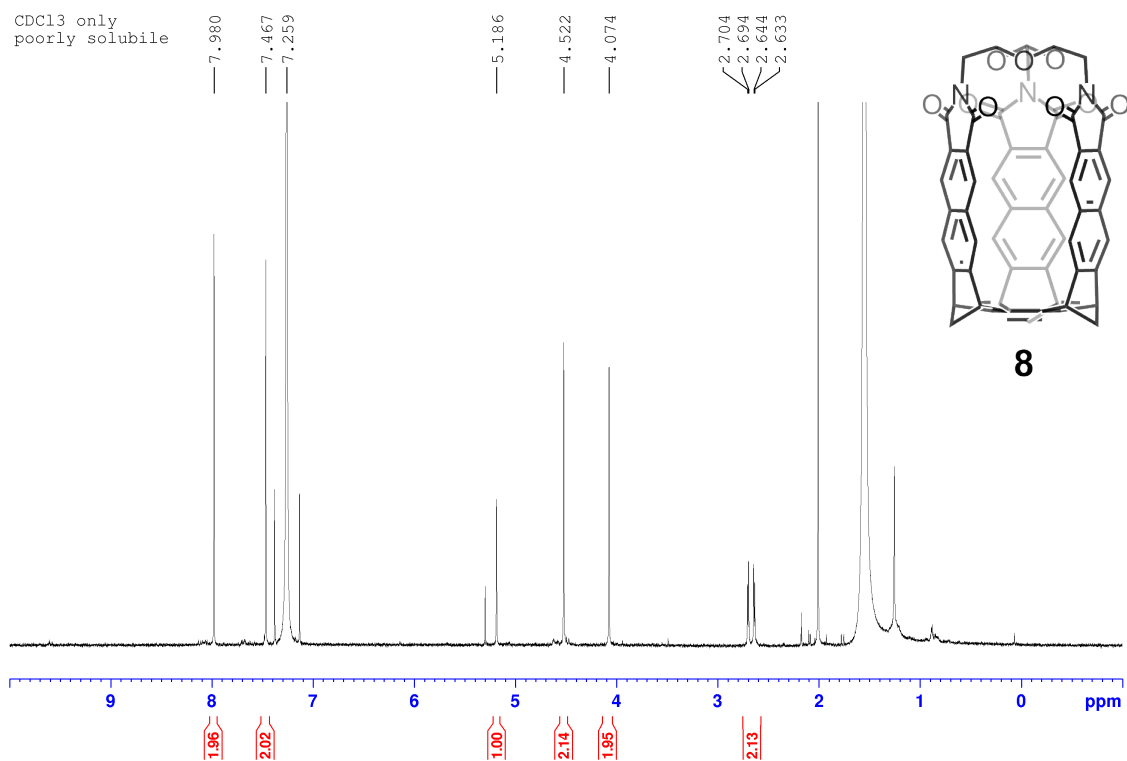

**Figure S15.** <sup>1</sup>H NMR spectrum (850 MHz, 298 K) of capsularene **8** in CDCl<sub>3</sub>; with **8** being poorly soluble in CDCl<sub>3</sub> (and other tested solvents), we had to use TFA to increase its solubility and obtain <sup>13</sup>C NMR spectrum (see below).

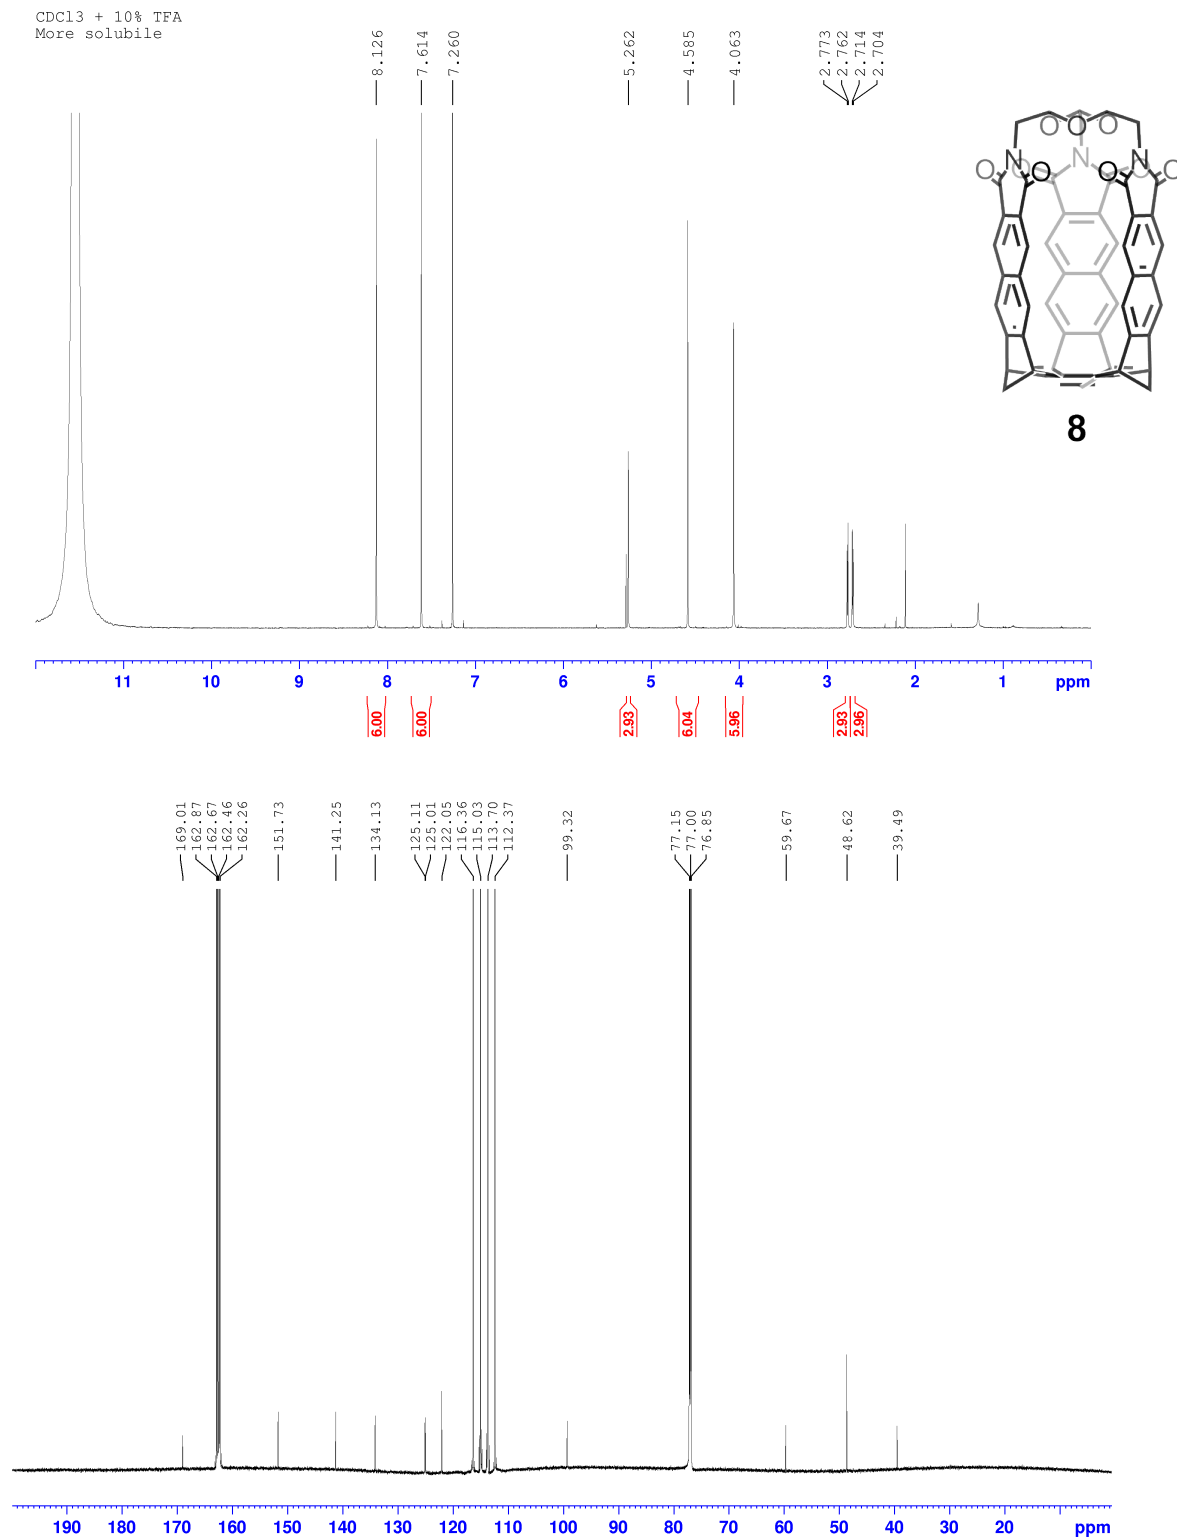

**Figure S16.** <sup>1</sup>H and <sup>13</sup>C NMR spectra (850/213 MHz, 298 K) of capsularene **8** in CDCl<sub>3</sub>: TFA = 9:1.



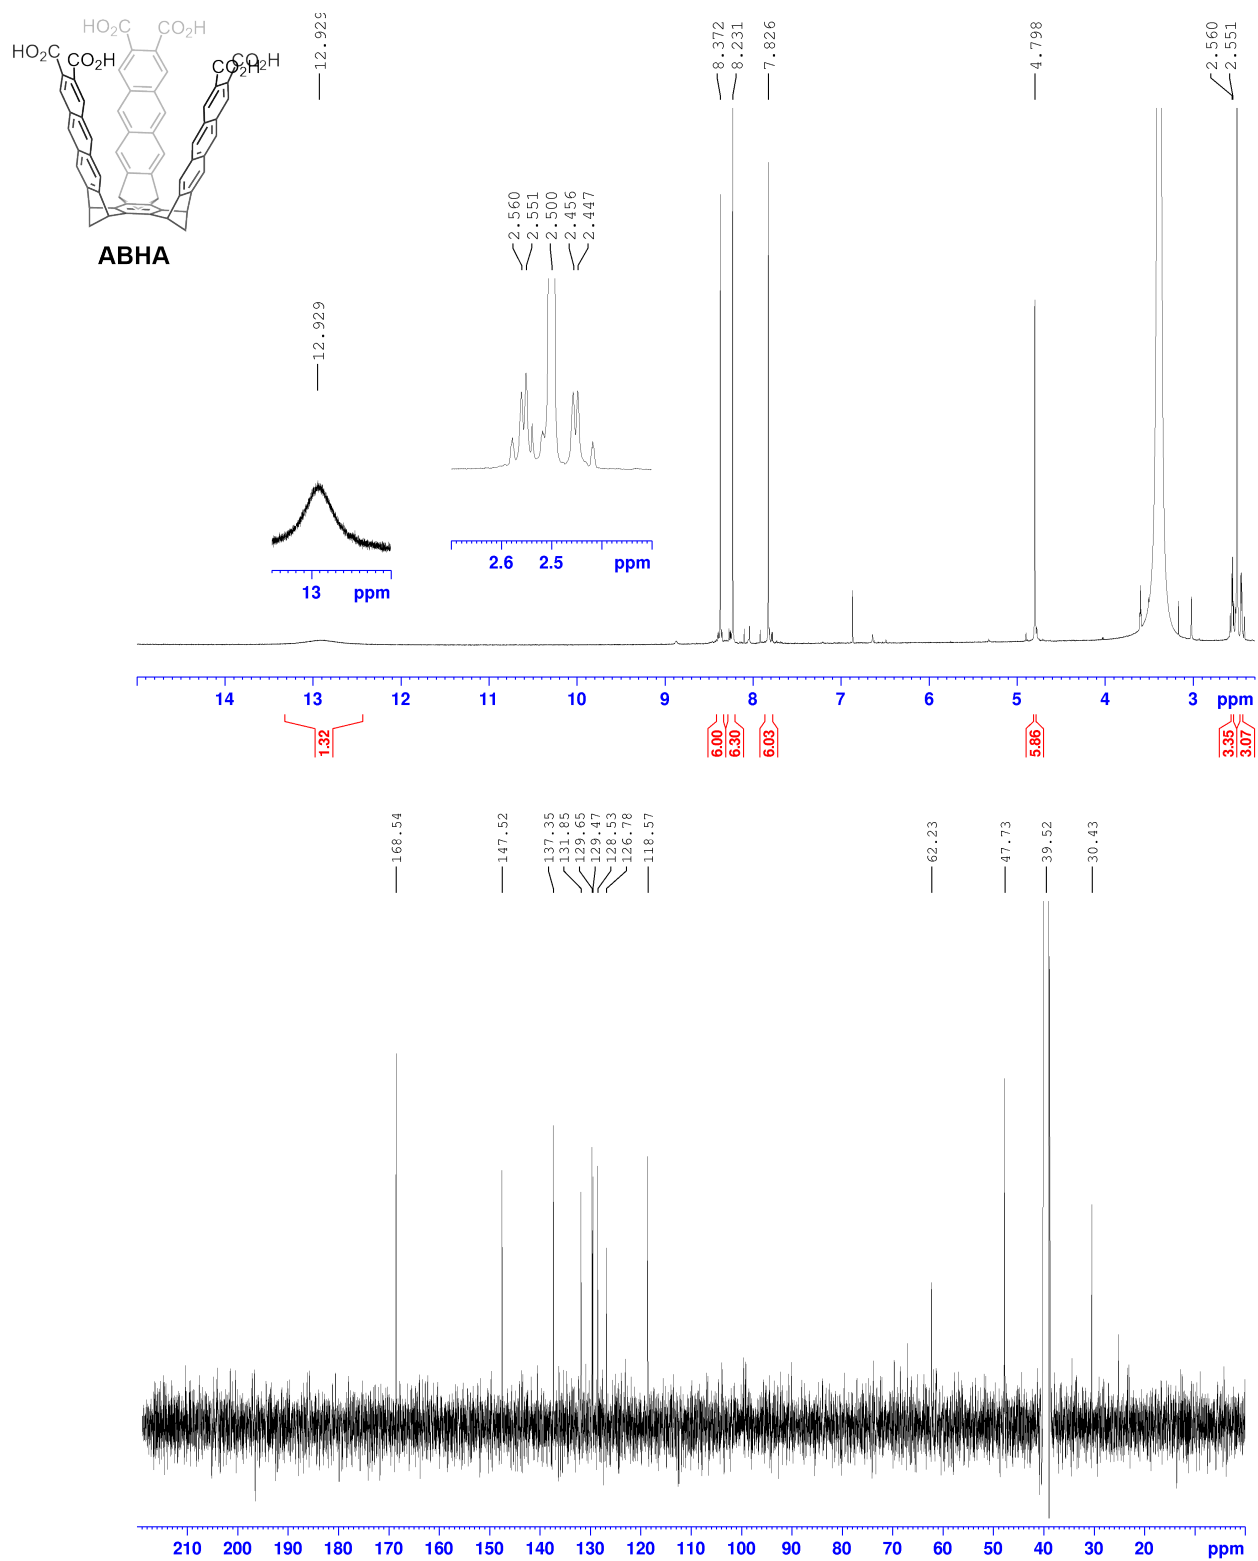

**Figure S17.** <sup>1</sup>H and <sup>13</sup>C NMR spectra (850/213 MHz, 298 K) of **ABHA** in DMSO-d<sub>6</sub>.



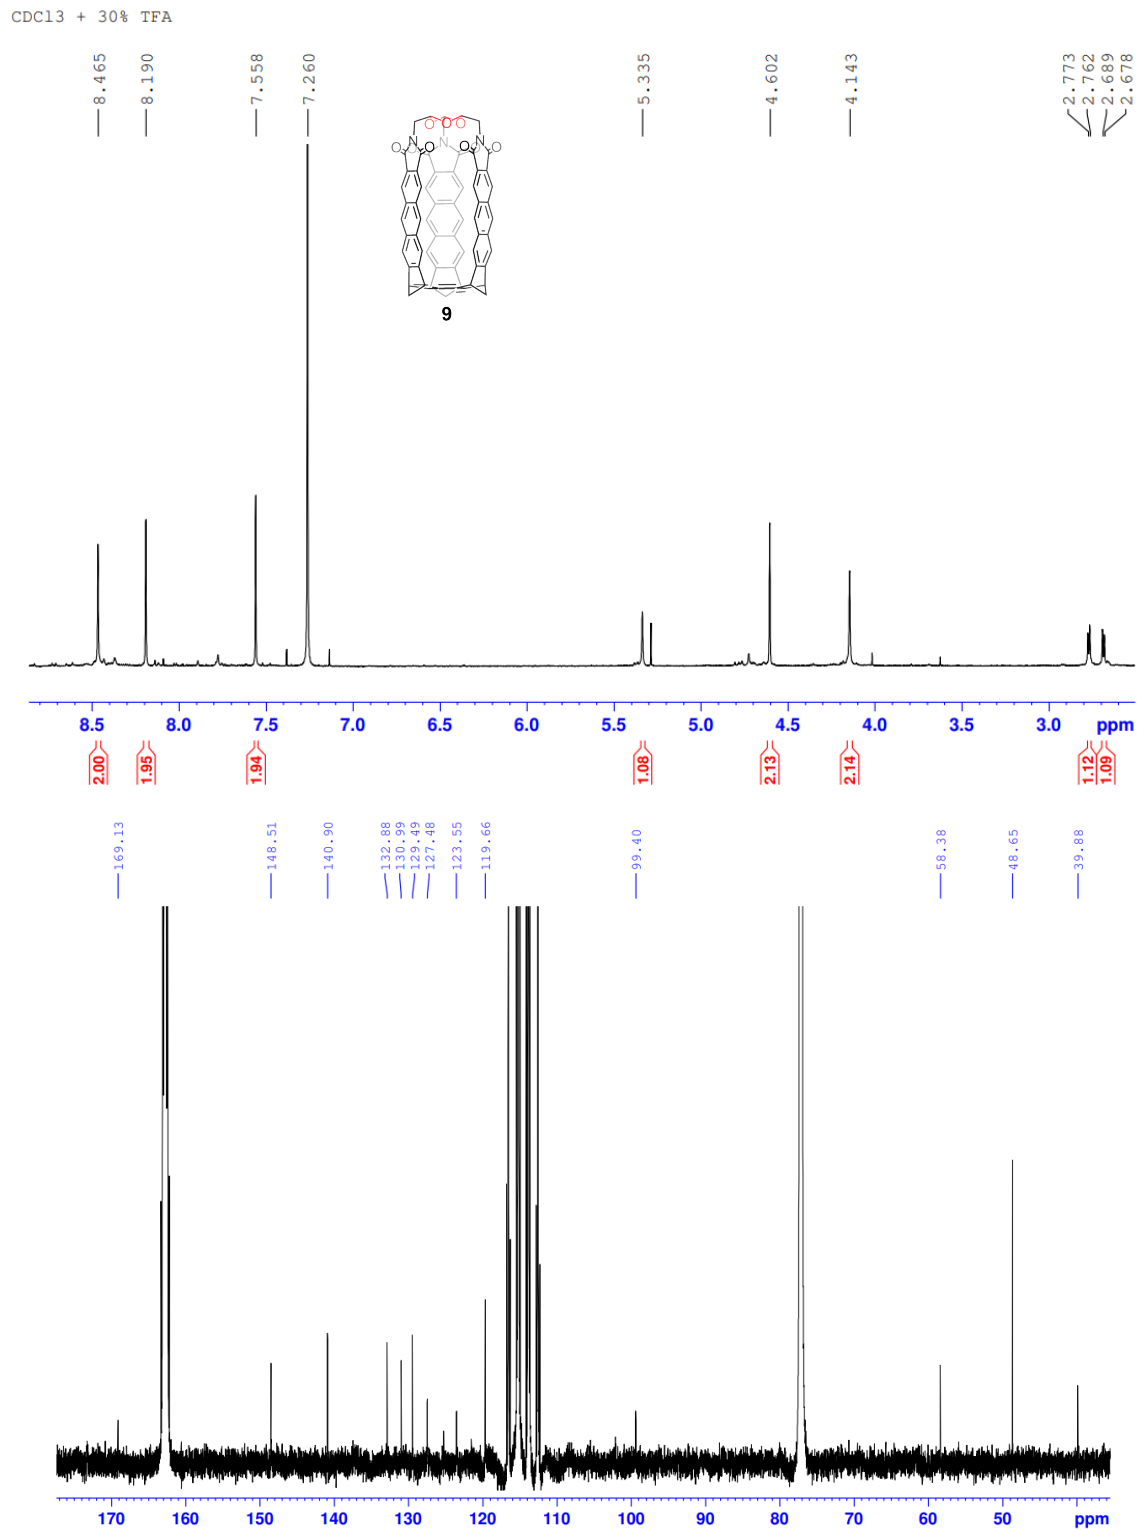

**Figure S19.** <sup>1</sup>H and <sup>13</sup>C NMR spectra (850/213 MHz, 298 K) of capsularene **9** in TFA : CDCl<sub>3</sub> = 3:7.

# Mechanistic Studies

**Dynamic exchange of 2-(1,3-dioxoisindolin-2-yl)acetaldehyde and trioxane 3:** The equilibrium between 2-(1,3-dioxoisindolin-2-yl)acetaldehyde and trioxane **3** (see below; see also Figure 2A in the main text) was inspected using  $^1\text{H}$  NMR spectroscopy. We have found that the reaction is slow on the chemical shift time scale ( $k_{\text{ex}} < \Delta\omega$ ;  $\Delta\omega = 2860$  Hz, Figure S20) below 298 K, but fast enough to allow quantifying the process with  $^1\text{H}/^1\text{H}$  EXSY (Figure S21). After obtaining equilibrium constants corresponding to the chemical exchange at different temperatures (Figure S22), we extracted thermodynamic  $\Delta H^\circ$  and  $\Delta S^\circ$  parameters from the Van't Hoff analysis.

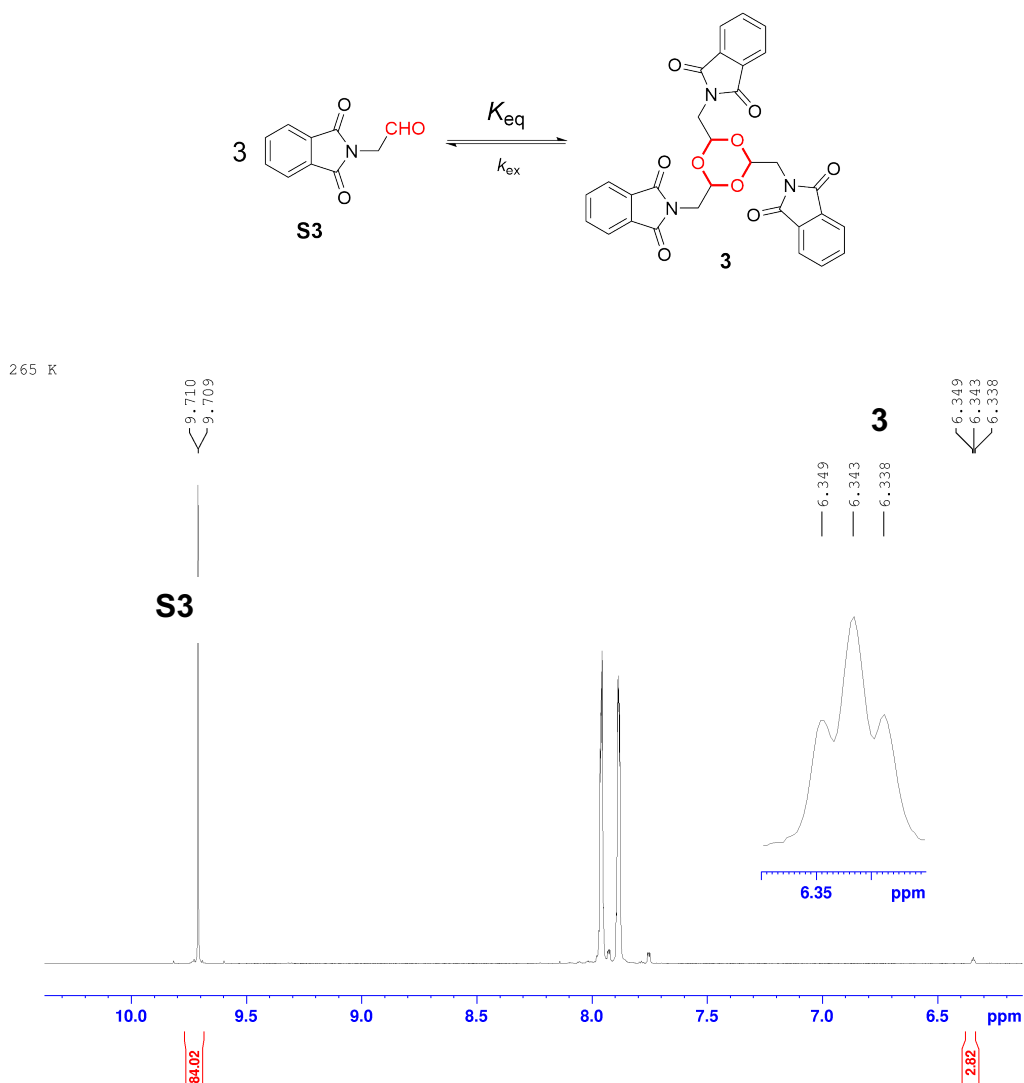

**Figure S20.** A segment of  $^1\text{H}$  NMR spectrum (850 MHz, 265 K,  $C_{\text{tot}}=35.2$  mM) of diluted 2-(1,3-dioxoisindolin-2-yl)acetaldehyde in 33%<sub>vol</sub> TFA in  $\text{CD}_2\text{Cl}_2$  revealing the formation of trioxane **3** (see a triplet at 6.343 ppm, 1.2%).

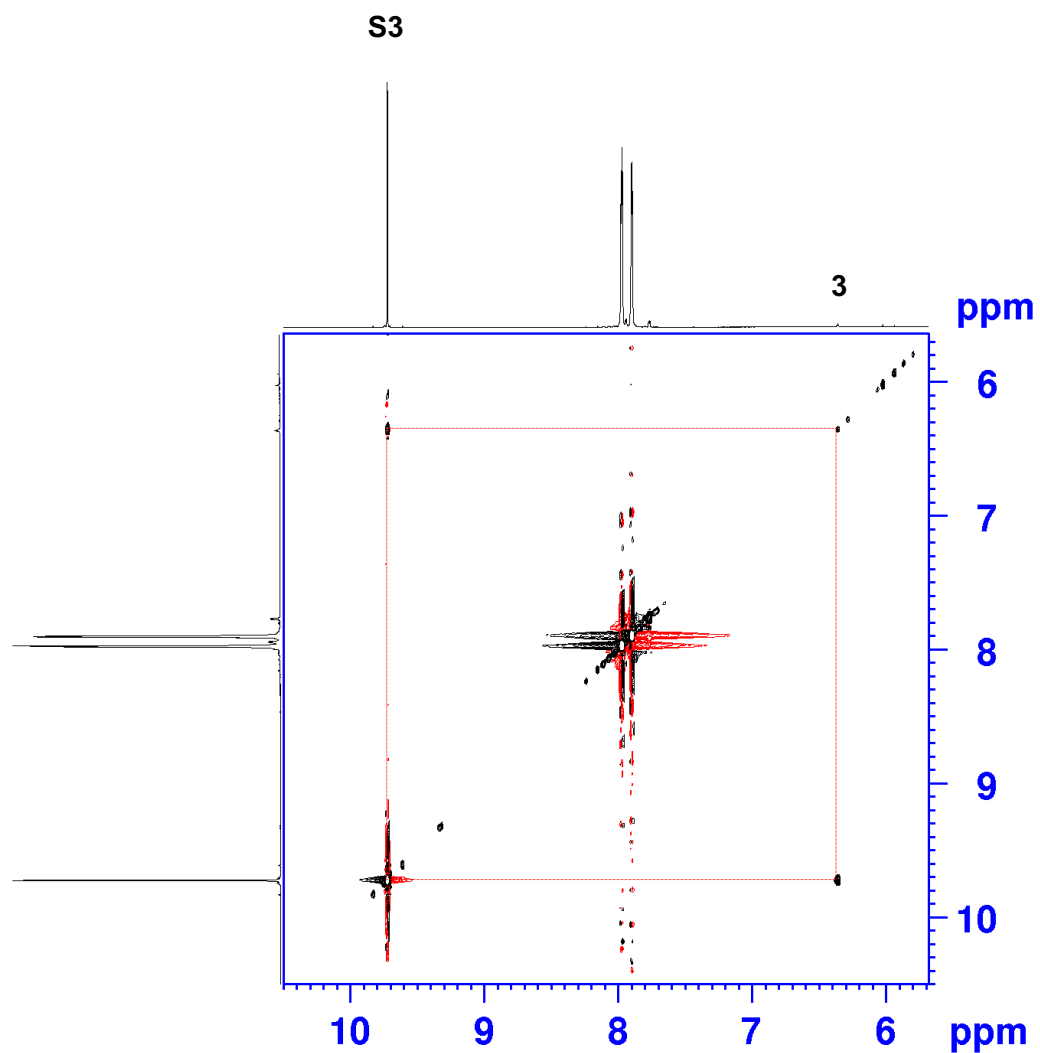

**Figure S21.** Partial  $^1\text{H}$ - $^1\text{H}$  EXSY NMR spectrum (850 MHz, 265 K, 33%<sub>vol</sub> TFA in  $\text{CD}_2\text{Cl}_2$ ,  $C_{\text{tot}}=35.2$  mM,  $t_{\text{mix}} = 1$  s) showing the exchange signal between 2-(1,3-dioxoisindolin-2-yl)acetaldehyde and trioxane **3**. The same observation was made after acquiring the EXSY spectrum with  $t_{\text{mix}}=40$  ms, which together with  $\Delta\omega$  and populations suggests that  $k_{\text{ex}}$  is between 25 and 1800  $\text{s}^{-1}$ .

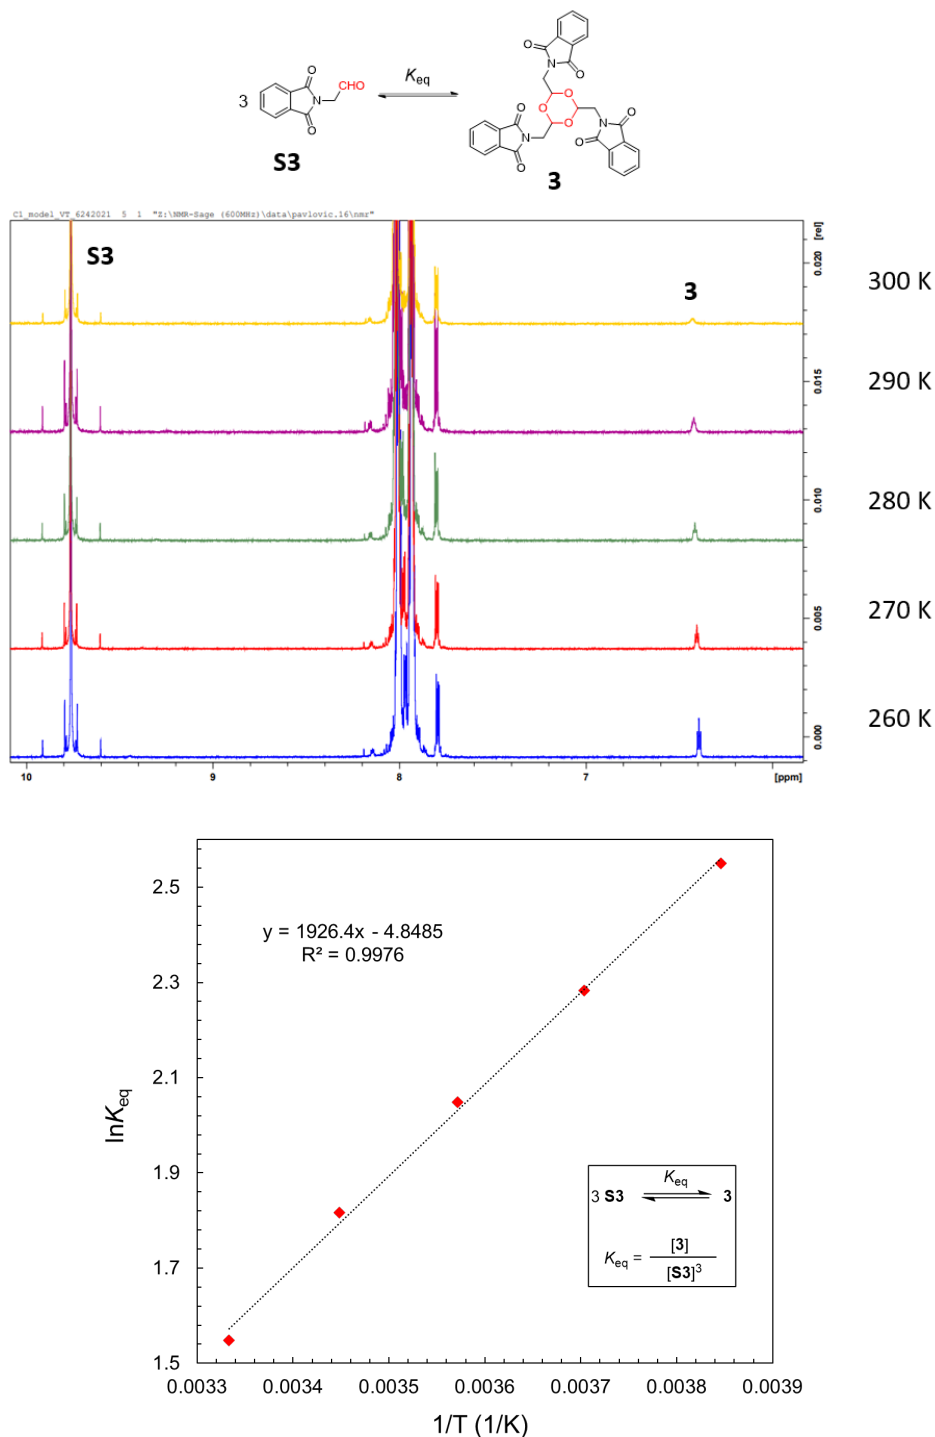

**Figure S22.** (Top) A segment of variable temperature  $^1\text{H}$  NMR spectra (600 MHz, 33% $_{\text{vol}}$  TFA in  $\text{CD}_2\text{Cl}_2$ ) of a solution of 2-(1,3-dioxoisindolin-2-yl)acetaldehyde (35.2 mM). The integration of the aldehyde resonance from 2-(1,3-dioxoisindolin-2-yl)acetaldehyde and the triplet resonance (6.343 ppm) from **3** gave the values of  $K_{eq}$  at each temperature (shown on the right). (Bottom) A plot showing the experimental dependence of  $\ln K_{eq}$  and  $1/T$  that was fit to a linear function. From the fitted curve, the slope was 1926.4 and the intercept  $-4.85$  so that using the van't Hoff equation we have  $\Delta H^\circ = 3.83$  kcal/mol and  $\Delta S^\circ = -9.64$  cal/molK.

**The Reaction's Rate Law and other Mechanistic Studies Pertaining the Formation Capsularene 1:**

The formation of capsularene **1** (Scheme S3) was monitored with  $^1\text{H}$  NMR spectroscopy, in which capsularene **1** and *tris*-aldehyde **2** showed sets of well separated proton resonances (i.e.,  $\text{H}_\text{A}$ ,  $\text{H}_\text{C}$  and  $\text{H}_\text{E}$ ; Figure S23). Under the established experimental conditions (TFA/ $\text{CD}_2\text{Cl}_2$ ), compound **4** underwent a rapid cleavage to produce *tris*-aldehyde **2**, which then slowly converted into capsularene **1** (Scheme S3). Accordingly, in the analysis of the kinetic data we considered *tris*-acetal **4** (Scheme S3) as the reactant; note that *tris*-aldehyde **2** was difficult to isolate. The real time NMR data were measured using Bruker 850 MHz (5mm Tripleresonance Inverse (TCI) cryoprobe with Z-Gradients), at T=298 K using 5 mm NMR cuvettes. Upon acquisition, the spectra were processed in Topspin (Fourier transformation; phase correction; baseline correction), and then the peak intensities were determined using Kinetic Analysis feature within Bruker Dynamic Center (Topspin). In particular, the intensities of aromatic  $\text{H}_\text{C}$  protons from **1** and **2** were used for quantification.

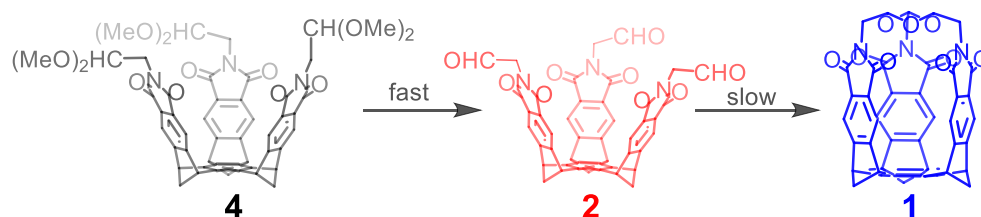

**Scheme S3.** *Tris*-acetal **4** undergoes an acetal cleavage reaction (TFA/ $\text{CD}_2\text{Cl}_2$ ) to give **2** which after intramolecular cyclotrimerization turns into capsularene **1**.

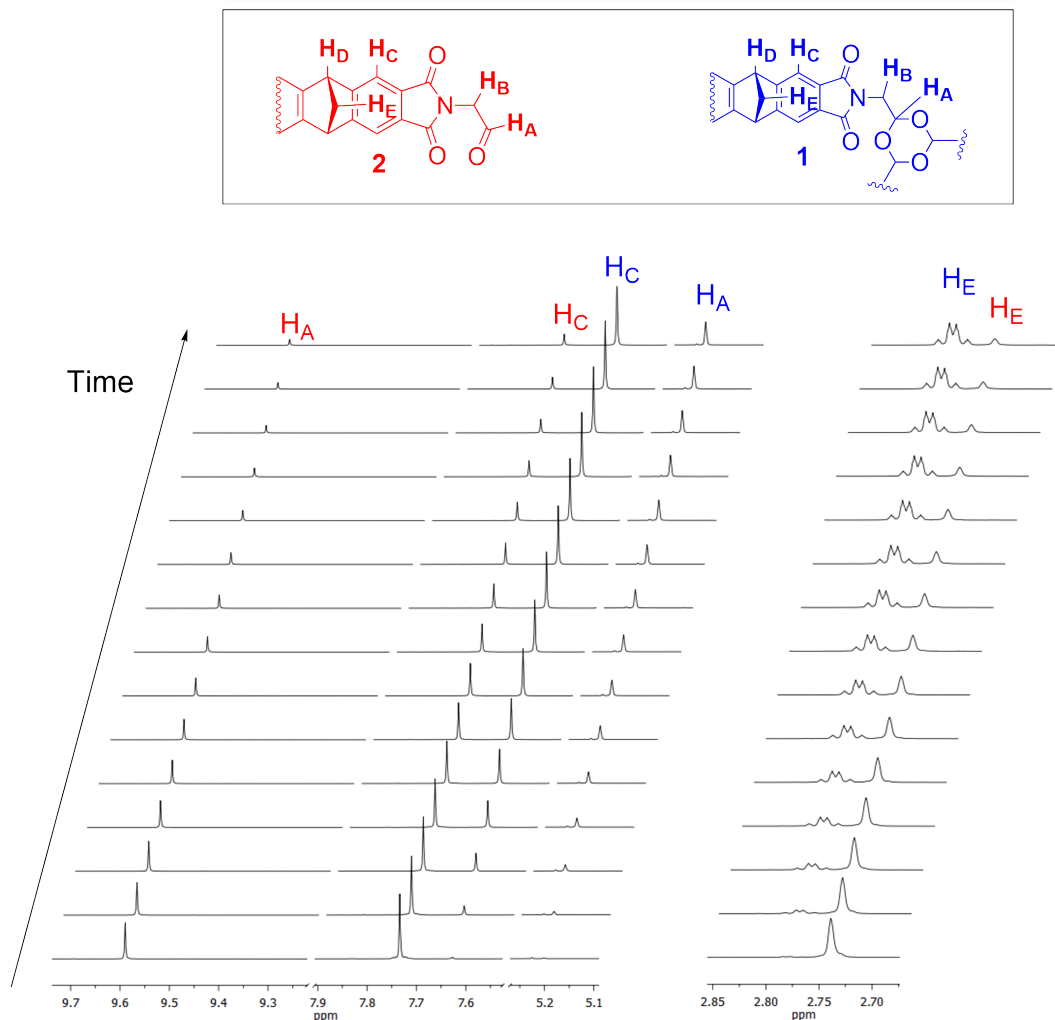

**Figure S23.** (A) An example of reaction progress kinetic analysis done by  $^1\text{H}$  NMR spectroscopy ( $\text{CD}_2\text{Cl}_2$ , 850 MHz,  $T=298\text{ K}$ ) using  $[\mathbf{3}]_0 = 2\text{ mM}$  and  $[\text{TFA}]_0 = 6.54\text{ M}$ . Three well separated proton resonances ( $\text{H}_A$ ,  $\text{H}_C$  and  $\text{H}_E$ ) from *tris*-aldehyde **2** and capsularene **1** were used in the analysis.

**The order of the reaction in trifluoroacetic acid (TFA):** To determine the reaction order in TFA, variable time normalization analysis (VTNA) was performed (Figure S24). For this purpose, we monitored the reaction's progress in the samples where *tris*-acetal **4** initial concentration was kept constant ( $[\mathbf{4}]_0 = 0.25\text{ mM}$ ), while the total TFA concentration was varied ( $[\text{TFA}]_0 = 0.654 - 6.54\text{ M}$ ). To prepare the samples, 65  $\mu\text{L}$  of stock solution of **4** = 2.50 mM was transferred to a 2 mL drum vial using volumetric syringe; for preparing stock solution of **4**, 2.3 mg of **4** was weighted in a 2 mL drum vial and dissolved in 1025.0  $\mu\text{L}$  of dry  $\text{CD}_2\text{Cl}_2$  to give 2.52 mM solution. Then, the samples were diluted with the corresponding amount of  $\text{CD}_2\text{Cl}_2$  followed by addition of the required amount of TFA (Table S1) to obtain  $V_{\text{tot}}=650\text{ }\mu\text{L}$  and match the desired  $[\text{TFA}]_{\text{tot}}$  concentration. The vial was closed and shaken 3 times. This was considered  $t = 0\text{ s}$  for the kinetic time course. Next, the solution was transferred to the NMR tube via Pasteur pipette, capped, and heavily wrapped with parafilm film to minimize evaporation (TFA is also corrosive and can damage the NMR probe!). The NMR tube was then inserted in Bruker 850 and series of  $^1\text{H}$  NMR spectra over time



were recorded at T=298 K. The data were processed according to explanation given at the beginning of the section.

**Table S1.** Reaction mixtures used for determining the reaction's order in TFA.

| [TFA] <sub>0</sub> , M | [4] <sub>0</sub> , mM | V(2.55 mM 4), μL | V(CD <sub>2</sub> Cl <sub>2</sub> ), μL | V(TFA), μL |
|------------------------|-----------------------|------------------|-----------------------------------------|------------|
| 6.54                   | 0.252                 | 65.0             | 260.0                                   | 325.0      |
| 3.92                   | 0.252                 | 65.0             | 390.0                                   | 195.0      |
| 0.98                   | 0.252                 | 65.0             | 536.0                                   | 49.0       |

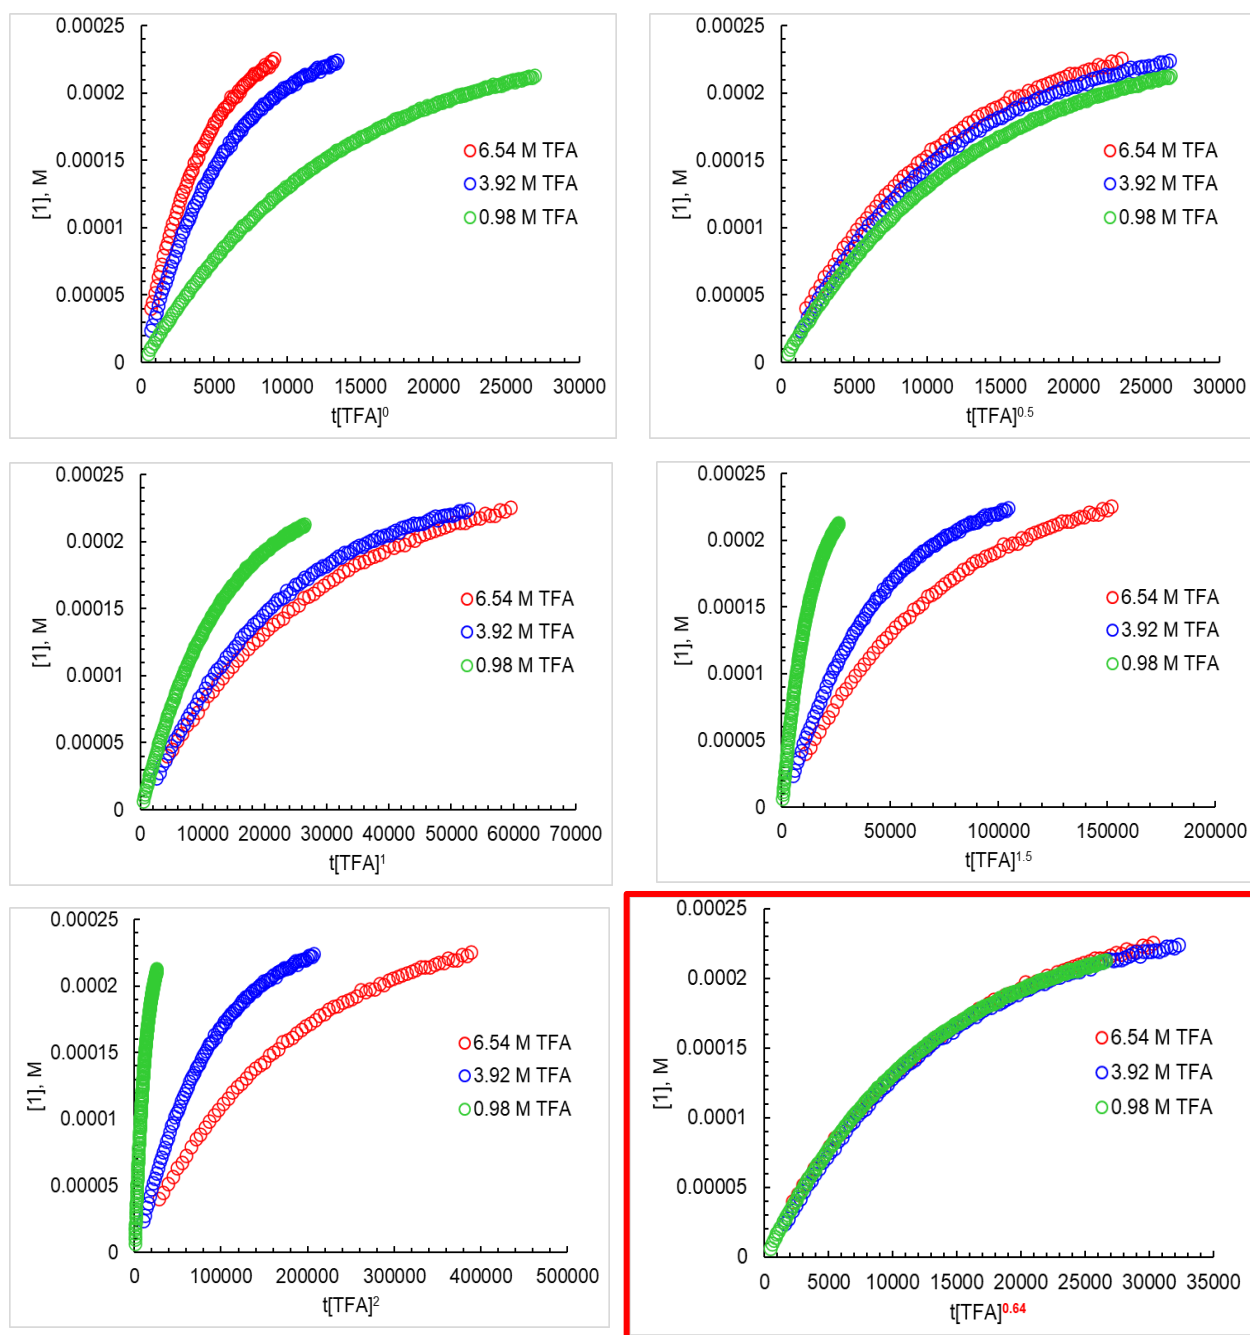

**Figure S24.** Change in the concentration of capsularene **1** as a function of time multiplied by modified concentration of TFA ( $[TFA]^n$ ) allowed us to determine the reaction's order in TFA. The plot circled by a red square shows that the three curves overlap when  $n = 0.64$ . The time/concentration data (obtained from real time  $^1H$  NMR measurements) used for this analysis are given in Tables S2-S4.

**Table S2.** Concentration of capsularene **1** as a function of time (from real time  $^1\text{H}$  NMR measurement, Figure S25) in the experiment where  $[\mathbf{4}]_0=0.25$  mM,  $[\text{TFA}]_0=6.54$  M.

| <b>t,s</b> | <b>[1], M</b> |      |          |       |          |       |          |       |          |
|------------|---------------|------|----------|-------|----------|-------|----------|-------|----------|
| 660        | 4.01E-05      | 4260 | 0.000161 | 7983  | 0.000214 | 11707 | 0.000237 | 15431 | 0.000241 |
| 784        | 4.5E-05       | 4384 | 0.000165 | 8107  | 0.000216 | 11831 | 0.000236 | 15555 | 0.000244 |
| 908        | 5.17E-05      | 4508 | 0.000167 | 8231  | 0.000218 | 11955 | 0.000235 | 15679 | 0.000245 |
| 1032       | 5.68E-05      | 4632 | 0.00017  | 8355  | 0.000218 | 12079 | 0.000239 | 15803 | 0.000243 |
| 1157       | 6.34E-05      | 4756 | 0.000172 | 8479  | 0.000221 | 12203 | 0.000238 | 15928 | 0.000246 |
| 1281       | 6.74E-05      | 4880 | 0.000174 | 8603  | 0.00022  | 12327 | 0.000238 | 16052 | 0.000246 |
| 1405       | 7.3E-05       | 5004 | 0.000178 | 8727  | 0.00022  | 12451 | 0.000239 | 16176 | 0.000246 |
| 1529       | 7.95E-05      | 5128 | 0.00018  | 8852  | 0.000224 | 12575 | 0.00024  | 16300 | 0.000246 |
| 1653       | 8.52E-05      | 5252 | 0.000182 | 8976  | 0.000223 | 12699 | 0.000238 | 16424 | 0.000245 |
| 1777       | 8.86E-05      | 5376 | 0.000185 | 9100  | 0.000226 | 12824 | 0.00024  | 16548 | 0.000245 |
| 1901       | 9.43E-05      | 5501 | 0.000185 | 9224  | 0.000225 | 12948 | 0.00024  | 16672 | 0.000247 |
| 2025       | 9.88E-05      | 5625 | 0.000188 | 9348  | 0.000224 | 13072 | 0.000239 | 16796 | 0.000246 |
| 2150       | 0.000103      | 5749 | 0.000189 | 9472  | 0.000227 | 13196 | 0.000242 | 16920 | 0.000246 |
| 2274       | 0.000107      | 5873 | 0.00019  | 9596  | 0.000227 | 13320 | 0.00024  | 17044 | 0.000245 |
| 2398       | 0.000112      | 5997 | 0.000192 | 9721  | 0.000227 | 13444 | 0.00024  | 17169 | 0.000245 |
| 2522       | 0.000116      | 6121 | 0.000197 | 9845  | 0.000228 | 13568 | 0.000241 | 17293 | 0.000246 |
| 2646       | 0.00012       | 6245 | 0.000196 | 9969  | 0.00023  | 13693 | 0.000242 | 17417 | 0.000247 |
| 2770       | 0.000124      | 6369 | 0.000198 | 10093 | 0.00023  | 13817 | 0.000242 | 17541 | 0.000246 |
| 2894       | 0.000127      | 6494 | 0.000198 | 10217 | 0.000231 | 13941 | 0.000242 | 17665 | 0.000248 |
| 3019       | 0.000131      | 6618 | 0.000202 | 10341 | 0.000232 | 14065 | 0.000242 | 17789 | 0.000247 |
| 3143       | 0.000135      | 6742 | 0.000201 | 10465 | 0.000232 | 14189 | 0.000242 | 17913 | 0.000248 |
| 3267       | 0.000139      | 6866 | 0.000205 | 10590 | 0.000232 | 14313 | 0.000244 | 18037 | 0.000247 |
| 3391       | 0.000141      | 6990 | 0.000206 | 10714 | 0.000233 | 14438 | 0.000244 | 18161 | 0.000246 |
| 3515       | 0.000143      | 7114 | 0.000207 | 10838 | 0.000233 | 14562 | 0.000243 | 18286 | 0.000249 |
| 3639       | 0.000148      | 7238 | 0.000208 | 10962 | 0.000234 | 14686 | 0.000245 | 18410 | 0.000248 |
| 3763       | 0.00015       | 7362 | 0.00021  | 11086 | 0.000232 | 14810 | 0.000243 | 18534 | 0.000246 |
| 3887       | 0.000153      | 7486 | 0.000211 | 11210 | 0.000234 | 14934 | 0.000243 | 18658 | 0.000248 |
| 4011       | 0.000158      | 7610 | 0.000213 | 11334 | 0.000234 | 15058 | 0.000245 | 18782 | 0.000247 |
| 4136       | 0.000159      | 7734 | 0.000214 | 11458 | 0.000235 | 15182 | 0.000244 | 18906 | 0.000246 |
|            |               | 7859 | 0.000215 | 11582 | 0.000236 | 15307 | 0.000245 |       |          |

**Table S3.** Concentration of capsularene **1** as a function of time (from real time <sup>1</sup>H NMR measurement, Figure S25) in the experiment where [4]<sub>0</sub>=0.25 mM, [TFA]<sub>0</sub>=3.92 M.

| time [s]: | [1], M   |      |          |       |          |       |          |       |          |
|-----------|----------|------|----------|-------|----------|-------|----------|-------|----------|
| 660       | 2.42E-05 | 4260 | 0.000131 | 8109  | 0.000189 | 11957 | 0.000217 | 15805 | 0.000234 |
| 784       | 2.77E-05 | 4384 | 0.000133 | 8233  | 0.000189 | 12081 | 0.000219 | 15929 | 0.00023  |
| 908       | 3.37E-05 | 4508 | 0.000135 | 8357  | 0.000192 | 12205 | 0.000216 | 16053 | 0.000231 |
| 1032      | 3.74E-05 | 4633 | 0.000138 | 8482  | 0.000192 | 12329 | 0.000219 | 16177 | 0.000232 |
| 1157      | 4.23E-05 | 4757 | 0.00014  | 8606  | 0.000193 | 12453 | 0.00022  | 16301 | 0.000233 |
| 1281      | 4.74E-05 | 4881 | 0.000142 | 8730  | 0.000195 | 12577 | 0.00022  | 16425 | 0.000232 |
| 1405      | 5.26E-05 | 5005 | 0.000145 | 8854  | 0.000196 | 12701 | 0.00022  | 16550 | 0.000233 |
| 1529      | 5.54E-05 | 5129 | 0.000148 | 8978  | 0.000197 | 12826 | 0.00022  | 16674 | 0.000235 |
| 1653      | 5.95E-05 | 5253 | 0.00015  | 9102  | 0.000197 | 12950 | 0.000221 | 16798 | 0.000233 |
| 1777      | 6.36E-05 | 5377 | 0.000152 | 9226  | 0.000198 | 13074 | 0.000223 | 16922 | 0.000231 |
| 1902      | 6.8E-05  | 5502 | 0.000154 | 9350  | 0.0002   | 13198 | 0.000223 | 17046 | 0.000231 |
| 2026      | 7.14E-05 | 5626 | 0.000157 | 9475  | 0.000201 | 13322 | 0.000222 | 17170 | 0.000235 |
| 2150      | 7.55E-05 | 5750 | 0.000158 | 9599  | 0.000201 | 13446 | 0.000224 | 17294 | 0.000234 |
| 2274      | 7.84E-05 | 5874 | 0.000159 | 9723  | 0.000203 | 13570 | 0.000224 | 17418 | 0.000235 |
| 2398      | 8.35E-05 | 5998 | 0.000163 | 9847  | 0.000203 | 13695 | 0.000224 | 17542 | 0.000235 |
| 2522      | 8.62E-05 | 6122 | 0.000162 | 9971  | 0.000205 | 13819 | 0.000225 | 17667 | 0.000235 |
| 2646      | 9.09E-05 | 6247 | 0.000166 | 10095 | 0.000205 | 13943 | 0.000225 | 17791 | 0.000235 |
| 2770      | 9.52E-05 | 6371 | 0.000168 | 10219 | 0.000205 | 14067 | 0.000228 | 17915 | 0.000236 |
| 2895      | 9.74E-05 | 6495 | 0.000169 | 10343 | 0.000207 | 14191 | 0.000226 | 18039 | 0.000238 |
| 3019      | 0.000102 | 6619 | 0.000171 | 10468 | 0.000208 | 14315 | 0.000227 | 18163 | 0.000236 |
| 3143      | 0.000104 | 6743 | 0.000173 | 10592 | 0.000207 | 14439 | 0.000227 | 18287 | 0.000237 |
| 3267      | 0.000106 | 6867 | 0.000173 | 10716 | 0.00021  | 14563 | 0.000228 | 18411 | 0.000238 |
| 3391      | 0.00011  | 6992 | 0.000176 | 10840 | 0.000211 | 14687 | 0.000228 | 18535 | 0.000238 |
| 3515      | 0.000114 | 7116 | 0.000178 | 10964 | 0.000212 | 14812 | 0.000229 | 18660 | 0.000237 |
| 3639      | 0.000116 | 7240 | 0.000179 | 11088 | 0.000213 | 14936 | 0.000228 | 18784 | 0.000238 |
| 3764      | 0.000119 | 7364 | 0.00018  | 11212 | 0.000214 | 15060 | 0.000228 | 18908 | 0.000236 |
| 3888      | 0.000122 | 7488 | 0.000182 | 11336 | 0.000213 | 15185 | 0.000229 | 19032 | 0.000238 |
| 4012      | 0.000124 | 7612 | 0.000182 | 11460 | 0.000214 | 15309 | 0.00023  | 19156 | 0.000237 |
| 4136      | 0.000128 | 7736 | 0.000184 | 11584 | 0.000214 | 15433 | 0.00023  | 19280 | 0.000239 |
|           |          | 7861 | 0.000185 | 11708 | 0.000215 | 15557 | 0.000231 | 19404 | 0.000238 |
|           |          | 7985 | 0.000187 | 11833 | 0.000216 | 15681 | 0.000232 | 19528 | 0.000241 |

|       |          |
|-------|----------|
| 19652 | 0.000239 |
| 19777 | 0.00024  |
| 19901 | 0.000239 |
| 20025 | 0.000239 |
| 20149 | 0.000239 |
| 20273 | 0.000238 |
| 20397 | 0.000238 |
| 20521 | 0.000238 |
| 20645 | 0.000239 |
| 20769 | 0.000241 |
| 20894 | 0.00024  |
| 21018 | 0.000239 |
| 21142 | 0.000238 |
| 21266 | 0.00024  |
| 21390 | 0.00024  |
| 21515 | 0.00024  |
| 21639 | 0.000239 |
| 21763 | 0.00024  |

|       |          |
|-------|----------|
| 21887 | 0.000242 |
| 22011 | 0.000243 |
| 22135 | 0.000241 |
| 22259 | 0.000242 |
| 22383 | 0.000242 |
| 22508 | 0.000242 |
| 22632 | 0.00024  |
| 22756 | 0.000242 |
| 22880 | 0.000241 |
| 23004 | 0.000242 |
| 23128 | 0.000241 |
| 23252 | 0.000241 |
| 23376 | 0.000243 |
| 23501 | 0.000244 |
| 23625 | 0.000243 |
| 23749 | 0.000243 |
| 23873 | 0.000244 |
| 23997 | 0.000242 |

|       |          |
|-------|----------|
| 24121 | 0.000242 |
| 24245 | 0.000241 |
| 24369 | 0.000242 |
| 24493 | 0.000242 |
| 24618 | 0.000244 |
| 24742 | 0.000243 |
| 24866 | 0.000244 |
| 24990 | 0.000243 |
| 25114 | 0.000242 |
| 25238 | 0.000243 |
| 25362 | 0.000243 |
| 25486 | 0.000244 |
| 25610 | 0.000245 |
| 25734 | 0.000245 |
| 25858 | 0.000243 |
| 25983 | 0.000243 |
| 26107 | 0.000243 |
| 26231 | 0.000243 |

|       |          |
|-------|----------|
| 26355 | 0.000244 |
| 26479 | 0.000244 |
| 26603 | 0.000244 |
| 26727 | 0.000243 |
| 26851 | 0.000245 |
| 26976 | 0.000246 |
| 27100 | 0.000244 |
| 27224 | 0.000243 |
| 27348 | 0.000244 |
| 27472 | 0.000244 |
| 27596 | 0.000244 |
| 27720 | 0.000244 |
| 27844 | 0.000245 |
| 27969 | 0.000247 |
| 28093 | 0.000244 |
| 28217 | 0.000245 |
| 28341 | 0.000244 |
| 28465 | 0.000244 |

|       |          |
|-------|----------|
| 28589 | 0.000247 |
| 28713 | 0.000246 |
| 28837 | 0.000245 |
| 28962 | 0.000243 |
| 29086 | 0.000245 |
| 29210 | 0.000244 |
| 29334 | 0.000243 |
| 29458 | 0.000244 |
| 29582 | 0.000245 |
| 29707 | 0.000246 |
| 29831 | 0.000246 |
| 29955 | 0.000244 |
| 30079 | 0.000243 |
| 30203 | 0.000244 |
| 30327 | 0.000245 |

**Table S4.** Concentration of capsularene **1** as a function of time (real time  $^1\text{H}$  NMR measurement, Figure S25) in the experiment where  $[\mathbf{4}]_0=0.25$  mM,  $[\text{TFA}]_0=0.98$  M.

| time [s]: | [1], M   |      |          |       |          |       |          |       |          |
|-----------|----------|------|----------|-------|----------|-------|----------|-------|----------|
| 480       | 6.67E-06 | 4078 | 6.49E-05 | 7926  | 0.000111 | 11773 | 0.000145 | 15622 | 0.00017  |
| 604       | 9.73E-06 | 4203 | 6.71E-05 | 8050  | 0.000113 | 11897 | 0.000146 | 15746 | 0.000171 |
| 728       | 1.21E-05 | 4327 | 6.77E-05 | 8174  | 0.000114 | 12021 | 0.000147 | 15870 | 0.000172 |
| 852       | 1.43E-05 | 4451 | 6.99E-05 | 8298  | 0.000115 | 12145 | 0.000148 | 15994 | 0.000172 |
| 976       | 1.71E-05 | 4575 | 7.13E-05 | 8422  | 0.000116 | 12270 | 0.000149 | 16118 | 0.000174 |
| 1100      | 1.83E-05 | 4699 | 7.29E-05 | 8547  | 0.000117 | 12394 | 0.00015  | 16243 | 0.000174 |
| 1224      | 2.09E-05 | 4823 | 7.44E-05 | 8671  | 0.000118 | 12518 | 0.00015  | 16367 | 0.000175 |
| 1348      | 2.24E-05 | 4947 | 7.64E-05 | 8795  | 0.000119 | 12642 | 0.000151 | 16491 | 0.000174 |
| 1472      | 2.57E-05 | 5072 | 7.83E-05 | 8919  | 0.000121 | 12766 | 0.000152 | 16615 | 0.000176 |
| 1596      | 2.7E-05  | 5195 | 7.92E-05 | 9043  | 0.000122 | 12890 | 0.000153 | 16739 | 0.000176 |
| 1720      | 2.92E-05 | 5320 | 8.13E-05 | 9167  | 0.000123 | 13015 | 0.000154 | 16863 | 0.000177 |
| 1844      | 3.08E-05 | 5444 | 8.2E-05  | 9291  | 0.000124 | 13139 | 0.000155 | 16988 | 0.000178 |
| 1968      | 3.26E-05 | 5568 | 8.44E-05 | 9415  | 0.000126 | 13263 | 0.000156 | 17112 | 0.000179 |
| 2092      | 3.49E-05 | 5692 | 8.6E-05  | 9539  | 0.000126 | 13387 | 0.000157 | 17236 | 0.000179 |
| 2216      | 3.72E-05 | 5816 | 8.75E-05 | 9663  | 0.000128 | 13511 | 0.000158 | 17360 | 0.00018  |
| 2340      | 3.92E-05 | 5940 | 8.9E-05  | 9788  | 0.000128 | 13636 | 0.000158 | 17482 | 0.00018  |
| 2464      | 4.07E-05 | 6064 | 9.04E-05 | 9912  | 0.00013  | 13760 | 0.000159 | 17605 | 0.000181 |
| 2589      | 4.29E-05 | 6189 | 9.17E-05 | 10036 | 0.000131 | 13884 | 0.00016  | 17730 | 0.000181 |
| 2713      | 4.52E-05 | 6313 | 9.39E-05 | 10160 | 0.000132 | 14008 | 0.000161 | 17854 | 0.000182 |
| 2837      | 4.66E-05 | 6437 | 9.49E-05 | 10284 | 0.000133 | 14132 | 0.000162 | 17978 | 0.000182 |
| 2961      | 4.88E-05 | 6561 | 9.59E-05 | 10408 | 0.000134 | 14256 | 0.000162 | 18102 | 0.000182 |
| 3085      | 5.09E-05 | 6685 | 9.77E-05 | 10532 | 0.000135 | 14380 | 0.000163 | 18226 | 0.000184 |
| 3209      | 5.19E-05 | 6809 | 9.91E-05 | 10656 | 0.000136 | 14504 | 0.000164 | 18350 | 0.000184 |
| 3334      | 5.45E-05 | 6933 | 0.000101 | 10780 | 0.000137 | 14629 | 0.000164 | 18475 | 0.000184 |
| 3458      | 5.63E-05 | 7057 | 0.000102 | 10904 | 0.000138 | 14753 | 0.000165 | 18599 | 0.000186 |
| 3582      | 5.78E-05 | 7182 | 0.000103 | 11029 | 0.000139 | 14877 | 0.000166 | 18723 | 0.000186 |
| 3706      | 5.99E-05 | 7306 | 0.000104 | 11153 | 0.00014  | 15001 | 0.000167 | 18847 | 0.000186 |
| 3830      | 6.16E-05 | 7430 | 0.000105 | 11277 | 0.000141 | 15125 | 0.000168 | 18971 | 0.000188 |
| 3954      | 6.27E-05 | 7554 | 0.000107 | 11401 | 0.000142 | 15249 | 0.000168 | 19095 | 0.000188 |
|           |          | 7678 | 0.000108 | 11525 | 0.000143 | 15373 | 0.000168 | 19219 | 0.000188 |
|           |          | 7802 | 0.000109 | 11649 | 0.000144 | 15498 | 0.000169 | 19344 | 0.000188 |

|       |          |
|-------|----------|
| 19468 | 0.000188 |
| 19592 | 0.00019  |
| 19716 | 0.00019  |
| 19840 | 0.00019  |
| 19965 | 0.00019  |
| 20089 | 0.000192 |
| 20213 | 0.000192 |
| 20337 | 0.000193 |
| 20461 | 0.000193 |
| 20585 | 0.000193 |
| 20709 | 0.000195 |
| 20834 | 0.000195 |
| 20958 | 0.000195 |

|       |          |
|-------|----------|
| 21082 | 0.000195 |
| 21206 | 0.000196 |
| 21330 | 0.000197 |
| 21454 | 0.000197 |
| 21578 | 0.000198 |
| 21702 | 0.000198 |
| 21826 | 0.000198 |
| 21951 | 0.000199 |
| 22075 | 0.000199 |
| 22199 | 0.000199 |
| 22323 | 0.0002   |
| 22447 | 0.0002   |
| 22571 | 0.000201 |

|       |          |
|-------|----------|
| 22696 | 0.000201 |
| 22820 | 0.000201 |
| 22944 | 0.000202 |
| 23068 | 0.000202 |
| 23192 | 0.000203 |
| 23316 | 0.000203 |
| 23440 | 0.000204 |
| 23565 | 0.000205 |
| 23689 | 0.000204 |
| 23813 | 0.000204 |
| 23937 | 0.000205 |
| 24061 | 0.000206 |
| 24185 | 0.000205 |

|       |          |
|-------|----------|
| 24309 | 0.000206 |
| 24433 | 0.000206 |
| 24557 | 0.000207 |
| 24682 | 0.000206 |
| 24806 | 0.000207 |
| 24930 | 0.000207 |
| 25054 | 0.000208 |
| 25178 | 0.000208 |
| 25302 | 0.000209 |
| 25426 | 0.00021  |
| 25550 | 0.000209 |
| 25674 | 0.00021  |
| 25799 | 0.00021  |

|       |          |
|-------|----------|
| 25923 | 0.00021  |
| 26047 | 0.00021  |
| 26171 | 0.000211 |
| 26295 | 0.000211 |
| 26419 | 0.000212 |
| 26543 | 0.000212 |
| 26668 | 0.000212 |
| 26792 | 0.000212 |
| 26914 | 0.000213 |

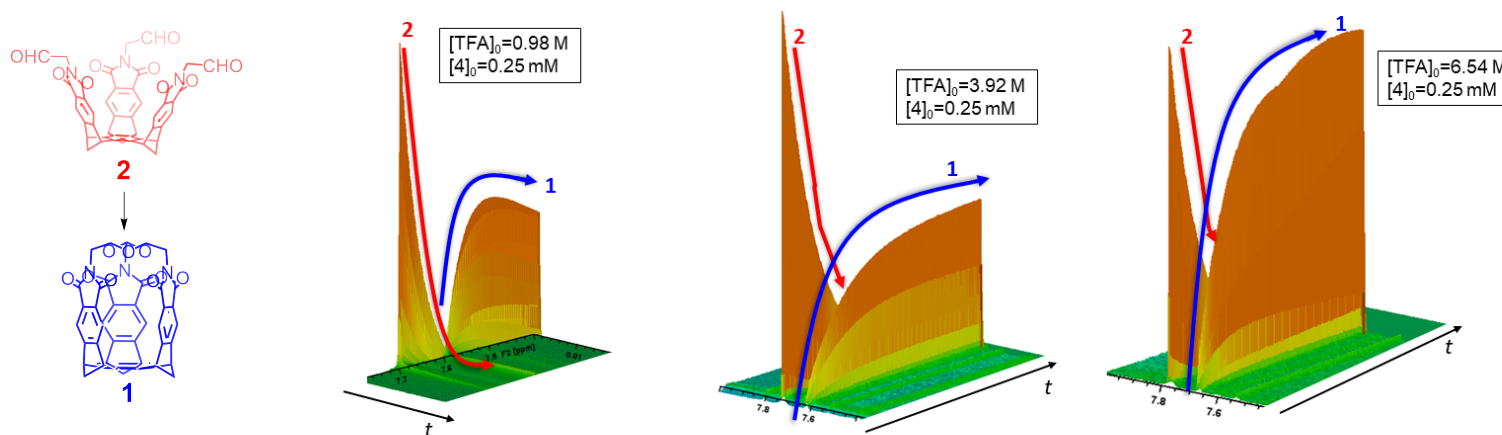

**Figure S25.** Using the intensity of aromatic  $H_c$  resonances in **2** and **1** (left), we monitored a change in the concentration of these two compounds (right) over time for three different reaction conditions (real time  $^1H$  NMR spectroscopy).

**The order of the reaction in *tris*-aldehyde 2:** To determine the reaction order in *tris*-aldehyde 2, we completed VTNA analysis (Figure S26). For this purpose, we monitored the reaction's progress by varying the initial concentration of *tris*-acetal 4 (i.e. *tris*-aldehyde 2) while keeping the total TFA concentration constant (all the reactions are performed in dry CD<sub>2</sub>Cl<sub>2</sub> if not stated otherwise). To prepare reaction mixtures, the appropriate amount of the corresponding stock solution of 4 (see below) was transferred to a 2 mL drum vial with a volumetric syringe (Table S5). Then, the samples were diluted with the corresponding amount of CD<sub>2</sub>Cl<sub>2</sub> followed by the addition of TFA (Table S5) to obtain V<sub>tot</sub>=650 μL. The vial was closed and shaken 3 times. This was considered t = 0 s for the course of the reaction. Next, the solution was transferred to an NMR tube via Pasteur pipette, capped, and heavily wrapped with parafilm to minimize evaporation (TFA is corrosive and can damage the probe!). The NMR tube was then inserted in Bruker 850 and series of <sup>1</sup>H NMR spectra were recorded at T=298 K. The data were processed according to explanation given at the beginning of the section.

Stock solutions *tris*-acetal 4: 2.3 mg of 4 was weighted out in a 2 mL drum vial and dissolved in 1025.0 μL of dry CD<sub>2</sub>Cl<sub>2</sub> to give 2.52 mM stock solution; 6.0 mg of 4 was weighted out in a 2 mL drum vial and dissolved in 341.7 μL of dry CD<sub>2</sub>Cl<sub>2</sub> to give 19.69 mM stock solution.

**Table S5.** Reaction mixtures used for determining order of the reaction in *tris*-aldehyde 2.

| [TFA] <sub>0</sub> , M | [4] <sub>0</sub> , mM | V(2.55 mM 4), μL  | V(CD <sub>2</sub> Cl <sub>2</sub> ), μL | V(TFA), μL |
|------------------------|-----------------------|-------------------|-----------------------------------------|------------|
| 6.54                   | 0.20                  | 51.0              | 274.0                                   | 325        |
| 6.54                   | 0.30                  | 76.5              | 248.5                                   | 325        |
| 6.54                   | 0.50                  | 127.5             | 197.5                                   | 325        |
| [TFA] <sub>0</sub> , M | [4] <sub>0</sub> , mM | V(19.69 mM 4), μL | V(CD <sub>2</sub> Cl <sub>2</sub> ), μL | V(TFA), μL |
| 6.54                   | 0.99                  | 32.7              | 292.3                                   | 325        |
| 6.54                   | 1.92                  | 63.4              | 261.7                                   | 325        |
| 6.54                   | 3.83                  | 126.4             | 198.6                                   | 325        |



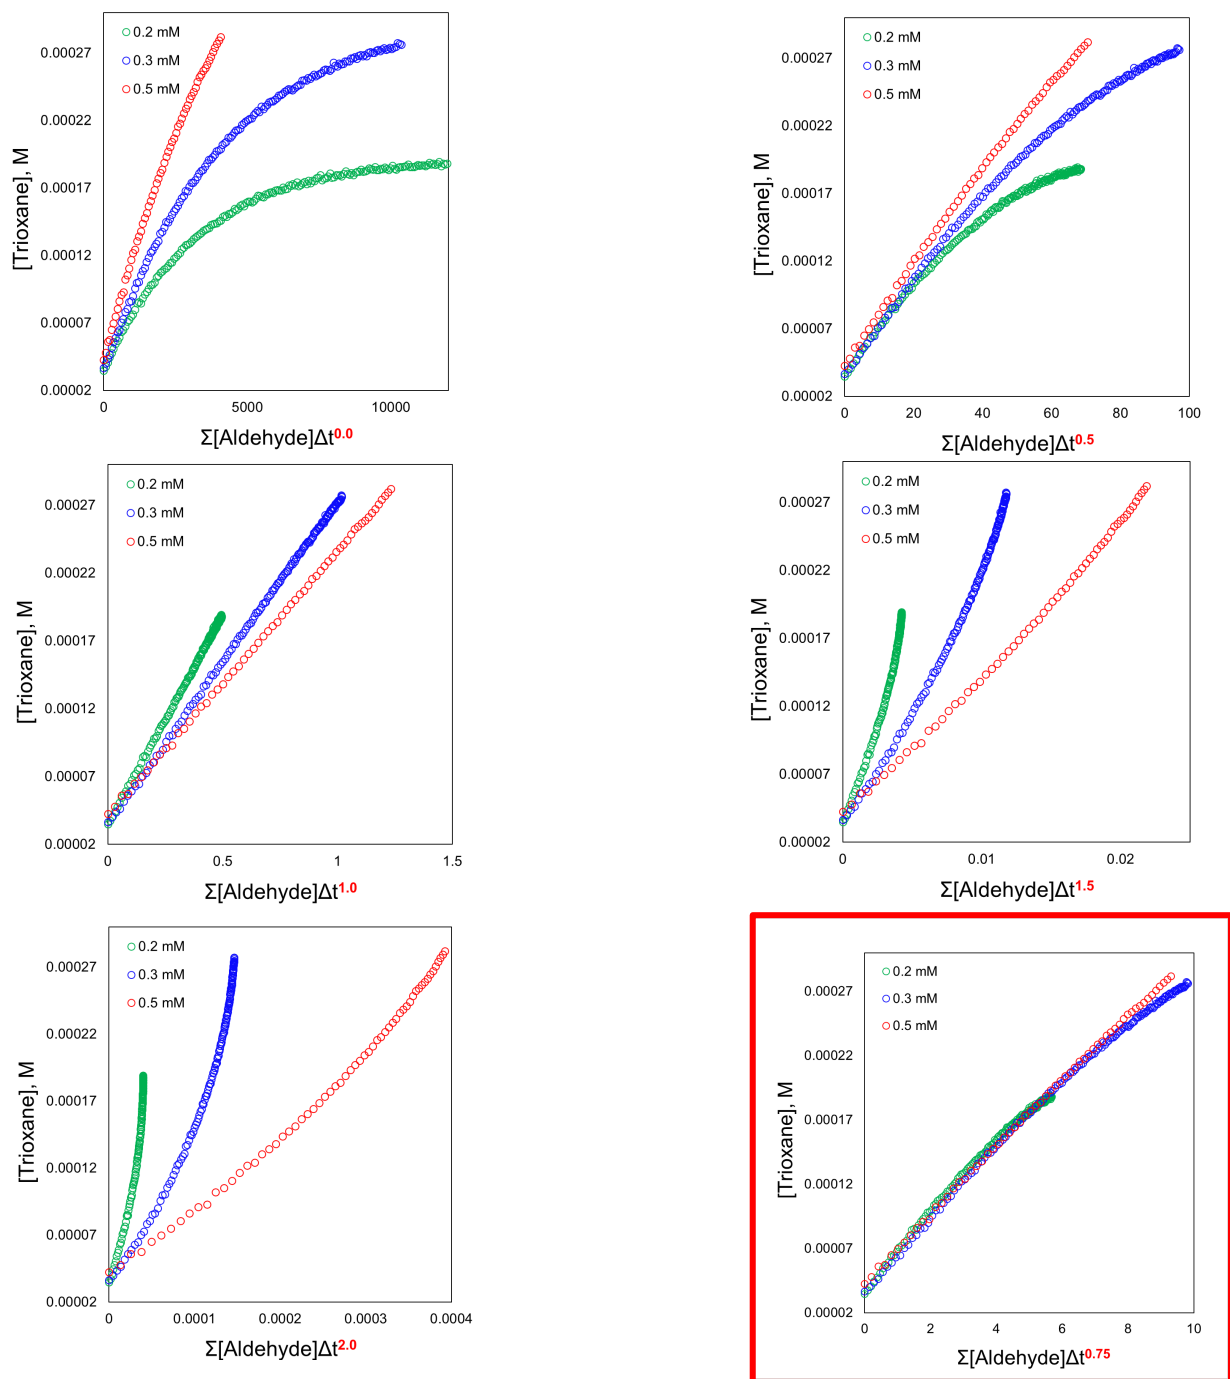

**Figure S26.** Change in the concentration of capsularene **1** as a function of time ( $\Delta t^n$ ) multiplied by modified concentration of *tris*-aldehyde **2** ( $\Sigma[2]$ ) allowed us to determine the reaction's order in **2**. The plot circled by a red square shows that the three curves overlap when  $n = 0.75$ . The time/concentration data (obtained from real time  $^1\text{H}$  NMR measurements) used for this analysis are given in Tables S6-S8.

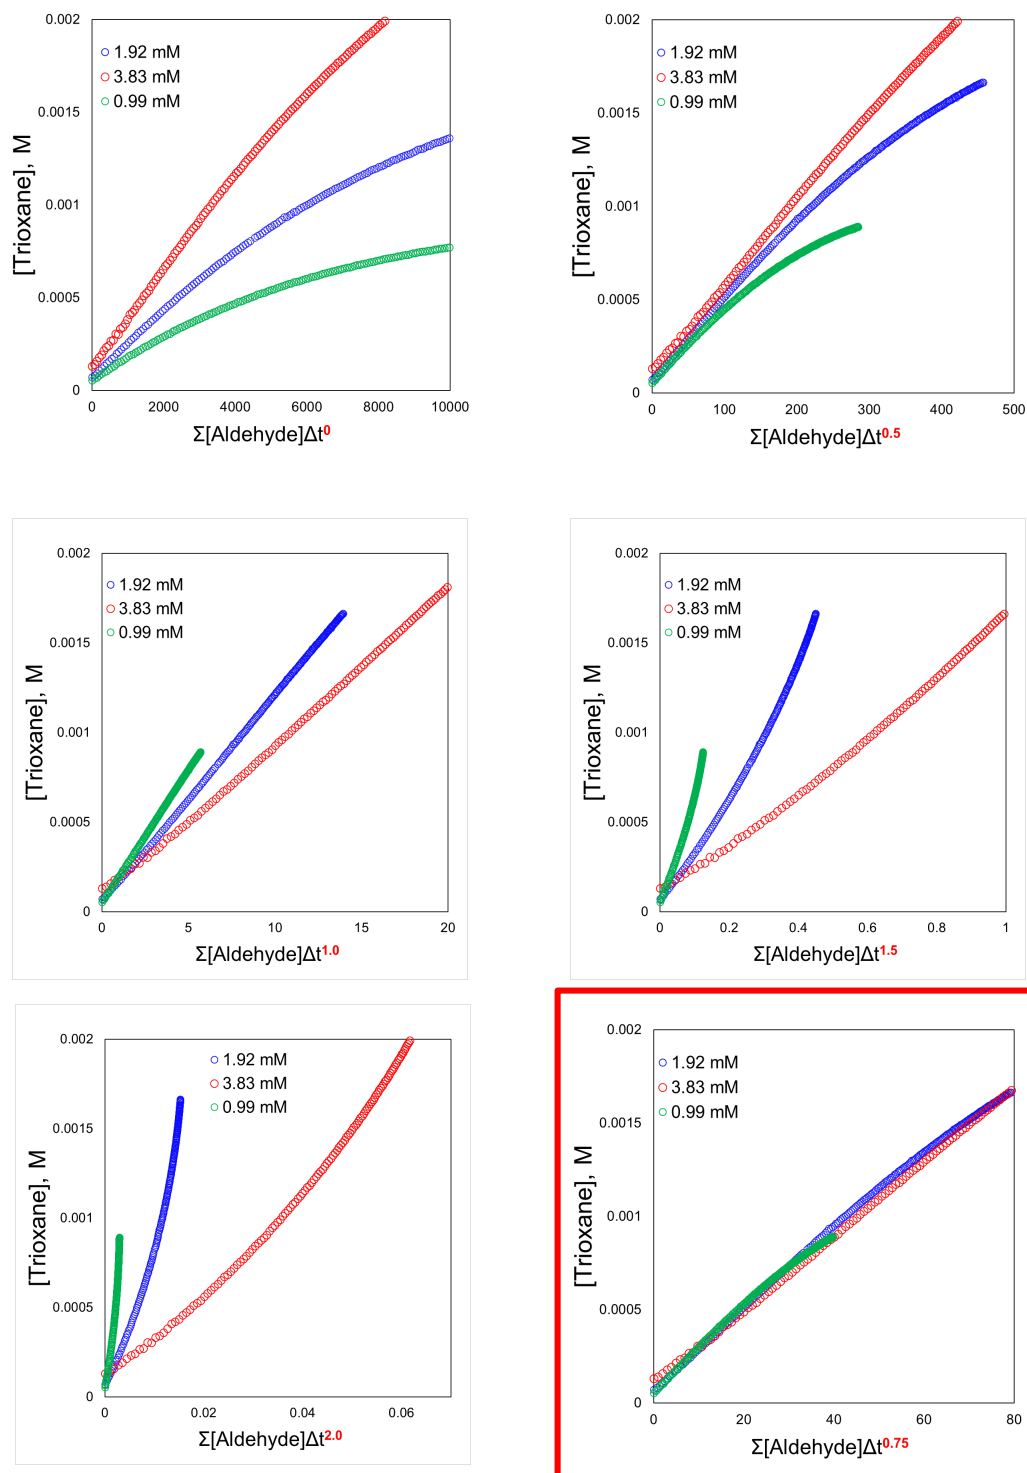

**Figure S27.** Change in the concentration of capsularene **1** as a function of time ( $\Delta t^n$ ) multiplied by modified concentration of *tris*-aldehyde **2** ( $\Sigma[\mathbf{2}]$ ) allowed us to determine the reaction's order in **2**. The plot circled by a red square shows that the three curves overlap when  $n = 0.75$ . The time/concentration data (obtained from real time  $^1\text{H}$  NMR measurements) used for this analysis are given in Tables S9-S11.

**Table S6.** Concentration of **1** and **2** as a function of time (real time  $^1\text{H}$  NMR measurement, Figure S28) in the experiment where  $[\mathbf{4}]_0=0.20$  mM,  $[\text{TFA}]_0=6.54$  M.

| time [s]: | [1], M   | [2], M   |
|-----------|----------|----------|
| 660       | 3.48E-05 | 0.000157 |
| 728       | 3.74E-05 | 0.000155 |
| 796       | 4.07E-05 | 0.000151 |
| 864       | 4.46E-05 | 0.000147 |
| 932       | 4.77E-05 | 0.000144 |
| 1000      | 5.08E-05 | 0.000141 |
| 1067      | 5.45E-05 | 0.000138 |
| 1135      | 5.7E-05  | 0.000135 |
| 1203      | 5.92E-05 | 0.000133 |
| 1271      | 6.33E-05 | 0.000129 |
| 1339      | 6.46E-05 | 0.000127 |
| 1407      | 6.74E-05 | 0.000125 |
| 1475      | 7.09E-05 | 0.000121 |
| 1543      | 7.22E-05 | 0.00012  |
| 1611      | 7.49E-05 | 0.000117 |
| 1678      | 7.64E-05 | 0.000116 |
| 1746      | 8E-05    | 0.000112 |
| 1814      | 8.45E-05 | 0.000108 |
| 1882      | 8.55E-05 | 0.000107 |
| 1950      | 8.46E-05 | 0.000107 |
| 2018      | 8.85E-05 | 0.000103 |
| 2086      | 9.14E-05 | 0.000101 |
| 2154      | 9.32E-05 | 9.88E-05 |
| 2222      | 9.54E-05 | 9.66E-05 |
| 2290      | 9.82E-05 | 9.38E-05 |
| 2358      | 9.84E-05 | 9.36E-05 |
| 2426      | 1E-04    | 9.2E-05  |
| 2494      | 0.000104 | 8.82E-05 |
| 2562      | 0.000105 | 8.67E-05 |
| 2630      | 0.000107 | 8.46E-05 |
| 2698      | 0.000108 | 8.36E-05 |

|      |          |          |
|------|----------|----------|
| 2765 | 0.00011  | 8.22E-05 |
| 2834 | 0.000111 | 8.11E-05 |
| 2901 | 0.000112 | 7.96E-05 |
| 2969 | 0.000115 | 7.73E-05 |
| 3037 | 0.000115 | 7.69E-05 |
| 3105 | 0.000118 | 7.43E-05 |
| 3173 | 0.000119 | 7.3E-05  |
| 3241 | 0.000121 | 7.13E-05 |
| 3309 | 0.000122 | 7.02E-05 |
| 3377 | 0.000125 | 6.72E-05 |
| 3445 | 0.000126 | 6.61E-05 |
| 3512 | 0.000128 | 6.42E-05 |
| 3580 | 0.000128 | 6.37E-05 |
| 3648 | 0.000129 | 6.29E-05 |
| 3716 | 0.00013  | 6.16E-05 |
| 3784 | 0.000132 | 5.96E-05 |
| 3852 | 0.000134 | 5.85E-05 |
| 3920 | 0.000134 | 5.76E-05 |
| 3988 | 0.000136 | 5.63E-05 |
| 4056 | 0.000137 | 5.52E-05 |
| 4124 | 0.000138 | 5.38E-05 |
| 4192 | 0.000139 | 5.29E-05 |
| 4260 | 0.00014  | 5.21E-05 |
| 4328 | 0.00014  | 5.16E-05 |
| 4396 | 0.000143 | 4.92E-05 |
| 4464 | 0.000143 | 4.85E-05 |
| 4531 | 0.000144 | 4.83E-05 |
| 4599 | 0.000144 | 4.79E-05 |
| 4667 | 0.000146 | 4.65E-05 |
| 4735 | 0.000146 | 4.61E-05 |
| 4803 | 0.000149 | 4.33E-05 |
| 4871 | 0.00015  | 4.25E-05 |

|      |          |          |
|------|----------|----------|
| 4939 | 0.000149 | 4.32E-05 |
| 5007 | 0.000151 | 4.11E-05 |
| 5075 | 0.000151 | 4.11E-05 |
| 5143 | 0.000152 | 3.97E-05 |
| 5211 | 0.000155 | 3.74E-05 |
| 5279 | 0.000154 | 3.84E-05 |
| 5346 | 0.000155 | 3.71E-05 |
| 5414 | 0.000157 | 3.5E-05  |
| 5482 | 0.000158 | 3.41E-05 |
| 5550 | 0.000157 | 3.55E-05 |
| 5618 | 0.000159 | 3.28E-05 |
| 5686 | 0.00016  | 3.19E-05 |
| 5754 | 0.00016  | 3.19E-05 |
| 5822 | 0.000159 | 3.27E-05 |
| 5890 | 0.00016  | 3.15E-05 |
| 5958 | 0.000162 | 2.97E-05 |
| 6026 | 0.000164 | 2.77E-05 |
| 6094 | 0.000164 | 2.78E-05 |
| 6162 | 0.000164 | 2.85E-05 |
| 6230 | 0.000163 | 2.87E-05 |
| 6298 | 0.000166 | 2.65E-05 |
| 6366 | 0.000165 | 2.65E-05 |
| 6433 | 0.000167 | 2.52E-05 |
| 6501 | 0.000167 | 2.5E-05  |
| 6569 | 0.000166 | 2.57E-05 |
| 6637 | 0.000168 | 2.37E-05 |
| 6705 | 0.000168 | 2.35E-05 |
| 6773 | 0.000168 | 2.36E-05 |
| 6841 | 0.000168 | 2.37E-05 |
| 6909 | 0.00017  | 2.16E-05 |
| 6977 | 0.000169 | 2.29E-05 |
| 7045 | 0.000169 | 2.26E-05 |

|      |          |          |
|------|----------|----------|
| 7113 | 0.000172 | 1.99E-05 |
| 7181 | 0.000172 | 2.03E-05 |
| 7249 | 0.000173 | 1.9E-05  |
| 7317 | 0.000172 | 1.98E-05 |
| 7385 | 0.000174 | 1.78E-05 |
| 7452 | 0.000172 | 2.05E-05 |
| 7520 | 0.000172 | 1.96E-05 |
| 7588 | 0.000174 | 1.84E-05 |
| 7656 | 0.000175 | 1.73E-05 |
| 7724 | 0.000173 | 1.89E-05 |
| 7792 | 0.000175 | 1.66E-05 |
| 7860 | 0.000174 | 1.82E-05 |
| 7928 | 0.000175 | 1.65E-05 |
| 7996 | 0.000175 | 1.68E-05 |
| 8064 | 0.000177 | 1.45E-05 |
| 8132 | 0.000178 | 1.44E-05 |
| 8200 | 0.00018  | 1.22E-05 |
| 8268 | 0.000176 | 1.61E-05 |
| 8336 | 0.000177 | 1.48E-05 |
| 8404 | 0.000177 | 1.46E-05 |
| 8472 | 0.000179 | 1.35E-05 |
| 8540 | 0.000181 | 1.11E-05 |
| 8608 | 0.000178 | 1.44E-05 |
| 8675 | 0.000178 | 1.4E-05  |
| 8743 | 0.00018  | 1.22E-05 |
| 8811 | 0.00018  | 1.24E-05 |
| 8879 | 0.00018  | 1.23E-05 |
| 8947 | 0.000179 | 1.33E-05 |
| 9015 | 0.000181 | 1.13E-05 |
| 9083 | 0.000182 | 9.58E-06 |
| 9151 | 0.000181 | 1.14E-05 |
| 9219 | 0.00018  | 1.21E-05 |

|       |          |          |
|-------|----------|----------|
| 9287  | 0.000181 | 1.07E-05 |
| 9355  | 0.00018  | 1.23E-05 |
| 9423  | 0.000181 | 1.06E-05 |
| 9491  | 0.000182 | 9.94E-06 |
| 9559  | 0.000182 | 9.97E-06 |
| 9627  | 0.000184 | 8.42E-06 |
| 9695  | 0.000182 | 9.97E-06 |
| 9762  | 0.000182 | 9.66E-06 |
| 9830  | 0.000183 | 8.81E-06 |
| 9898  | 0.000185 | 7.25E-06 |
| 9966  | 0.000184 | 8E-06    |
| 10034 | 0.000184 | 8.27E-06 |
| 10102 | 0.000186 | 6.29E-06 |
| 10170 | 0.000183 | 8.61E-06 |
| 10238 | 0.000183 | 8.56E-06 |
| 10306 | 0.000184 | 7.54E-06 |
| 10374 | 0.000184 | 7.87E-06 |
| 10442 | 0.000185 | 6.82E-06 |
| 10510 | 0.000184 | 7.78E-06 |
| 10578 | 0.000184 | 8.44E-06 |
| 10646 | 0.000185 | 7.45E-06 |
| 10714 | 0.000187 | 5.28E-06 |
| 10782 | 0.000184 | 7.75E-06 |
| 10850 | 0.000184 | 8.26E-06 |
| 10918 | 0.000185 | 6.58E-06 |
| 10986 | 0.000186 | 6.44E-06 |
| 11053 | 0.000186 | 6.3E-06  |
| 11121 | 0.000186 | 6.12E-06 |
| 11189 | 0.000186 | 5.84E-06 |
| 11257 | 0.000188 | 4.4E-06  |
| 11325 | 0.000186 | 6.33E-06 |
| 11393 | 0.000186 | 6.36E-06 |
| 11461 | 0.000186 | 6.43E-06 |
| 11529 | 0.000186 | 5.63E-06 |
| 11597 | 0.000187 | 4.82E-06 |

|       |          |          |
|-------|----------|----------|
| 11665 | 0.000187 | 5.31E-06 |
| 11733 | 0.000187 | 5.07E-06 |
| 11801 | 0.000187 | 5.03E-06 |
| 11869 | 0.000186 | 5.89E-06 |
| 11936 | 0.000187 | 4.77E-06 |
| 12005 | 0.000189 | 3.08E-06 |
| 12072 | 0.000187 | 4.55E-06 |
| 12140 | 0.000188 | 3.81E-06 |
| 12208 | 0.000187 | 4.75E-06 |
| 12276 | 0.000188 | 4.27E-06 |
| 12344 | 0.000189 | 2.67E-06 |
| 12412 | 0.000186 | 5.59E-06 |
| 12480 | 0.000188 | 3.8E-06  |
| 12548 | 0.000188 | 4.37E-06 |
| 12616 | 0.000188 | 3.99E-06 |
| 12684 | 0.000188 | 3.9E-06  |
| 12752 | 0.000188 | 4.36E-06 |
| 12820 | 0.000188 | 4E-06    |

**Table S7.** Concentration of **1** and **2** as a function of time (real time <sup>1</sup>H NMR measurement, Figure S28) in the experiment where [4]<sub>0</sub>=0.30 mM, [TFA]<sub>0</sub>=6.54 M.

| time [s]: | [1], M   | [2], M   |
|-----------|----------|----------|
| 420       | 3.65E-05 | 0.000263 |
| 487       | 4E-05    | 0.00026  |
| 555       | 4.36E-05 | 0.000256 |
| 623       | 4.64E-05 | 0.000254 |
| 691       | 5.17E-05 | 0.000248 |
| 758       | 5.6E-05  | 0.000244 |
| 826       | 5.91E-05 | 0.000241 |
| 894       | 6.3E-05  | 0.000237 |
| 962       | 6.48E-05 | 0.000235 |
| 1029      | 7.03E-05 | 0.00023  |
| 1097      | 7.28E-05 | 0.000227 |
| 1165      | 7.83E-05 | 0.000222 |
| 1233      | 8.05E-05 | 0.00022  |
| 1300      | 8.54E-05 | 0.000215 |
| 1368      | 8.63E-05 | 0.000214 |
| 1436      | 9E-05    | 0.00021  |
| 1503      | 9.58E-05 | 0.000204 |
| 1571      | 9.98E-05 | 0.0002   |
| 1639      | 0.000101 | 0.000199 |
| 1707      | 0.000105 | 0.000195 |
| 1775      | 0.000109 | 0.000191 |
| 1842      | 0.000111 | 0.000189 |
| 1910      | 0.000115 | 0.000185 |
| 1978      | 0.000118 | 0.000182 |
| 2046      | 0.000122 | 0.000178 |
| 2113      | 0.000124 | 0.000176 |
| 2181      | 0.000127 | 0.000173 |
| 2249      | 0.000129 | 0.000171 |
| 2317      | 0.000131 | 0.000169 |
| 2385      | 0.000136 | 0.000164 |
| 2452      | 0.000137 | 0.000163 |

|      |          |          |
|------|----------|----------|
| 2520 | 0.000141 | 0.000159 |
| 2588 | 0.000145 | 0.000155 |
| 2656 | 0.000145 | 0.000155 |
| 2724 | 0.000147 | 0.000153 |
| 2791 | 0.00015  | 0.00015  |
| 2859 | 0.000153 | 0.000147 |
| 2927 | 0.000155 | 0.000145 |
| 2995 | 0.000157 | 0.000143 |
| 3063 | 0.00016  | 0.00014  |
| 3130 | 0.000163 | 0.000137 |
| 3198 | 0.000164 | 0.000136 |
| 3266 | 0.000168 | 0.000132 |
| 3334 | 0.000168 | 0.000132 |
| 3401 | 0.000171 | 0.000129 |
| 3469 | 0.000174 | 0.000126 |
| 3537 | 0.000174 | 0.000126 |
| 3605 | 0.000176 | 0.000124 |
| 3673 | 0.000178 | 0.000122 |
| 3741 | 0.000181 | 0.000119 |
| 3808 | 0.000183 | 0.000117 |
| 3876 | 0.000183 | 0.000117 |
| 3944 | 0.000186 | 0.000114 |
| 4012 | 0.000188 | 0.000112 |
| 4079 | 0.000191 | 0.000109 |
| 4147 | 0.000191 | 0.000109 |
| 4215 | 0.000193 | 0.000107 |
| 4283 | 0.000195 | 0.000105 |
| 4350 | 0.000197 | 0.000103 |
| 4418 | 0.000198 | 0.000102 |
| 4486 | 0.000199 | 0.000101 |
| 4554 | 0.000202 | 9.8E-05  |
| 4621 | 0.000203 | 9.68E-05 |

|      |          |          |
|------|----------|----------|
| 4689 | 0.000204 | 9.59E-05 |
| 4757 | 0.000207 | 9.26E-05 |
| 4825 | 0.000207 | 9.26E-05 |
| 4892 | 0.000209 | 9.09E-05 |
| 4960 | 0.000211 | 8.88E-05 |
| 5028 | 0.000213 | 8.73E-05 |
| 5095 | 0.000213 | 8.71E-05 |
| 5163 | 0.000214 | 8.58E-05 |
| 5231 | 0.000217 | 8.32E-05 |
| 5299 | 0.000218 | 8.18E-05 |
| 5367 | 0.000219 | 8.07E-05 |
| 5434 | 0.00022  | 7.96E-05 |
| 5502 | 0.000221 | 7.86E-05 |
| 5570 | 0.000222 | 7.85E-05 |
| 5638 | 0.000224 | 7.57E-05 |
| 5705 | 0.000226 | 7.44E-05 |
| 5773 | 0.000227 | 7.27E-05 |
| 5841 | 0.000226 | 7.36E-05 |
| 5909 | 0.00023  | 6.96E-05 |
| 5976 | 0.000228 | 7.15E-05 |
| 6044 | 0.00023  | 6.95E-05 |
| 6112 | 0.000232 | 6.82E-05 |
| 6179 | 0.000234 | 6.63E-05 |
| 6247 | 0.000234 | 6.56E-05 |
| 6315 | 0.000234 | 6.57E-05 |
| 6383 | 0.000235 | 6.45E-05 |
| 6451 | 0.000237 | 6.34E-05 |
| 6519 | 0.000239 | 6.12E-05 |
| 6587 | 0.000239 | 6.09E-05 |
| 6654 | 0.00024  | 6E-05    |
| 6722 | 0.000241 | 5.86E-05 |
| 6790 | 0.000242 | 5.76E-05 |

|      |          |          |
|------|----------|----------|
| 6857 | 0.000243 | 5.66E-05 |
| 6925 | 0.000243 | 5.69E-05 |
| 6993 | 0.000242 | 5.75E-05 |
| 7061 | 0.000244 | 5.58E-05 |
| 7129 | 0.000245 | 5.48E-05 |
| 7197 | 0.000246 | 5.38E-05 |
| 7265 | 0.000247 | 5.34E-05 |
| 7332 | 0.00025  | 5.04E-05 |
| 7400 | 0.00025  | 5.01E-05 |
| 7468 | 0.00025  | 5.01E-05 |
| 7536 | 0.000252 | 4.84E-05 |
| 7604 | 0.000251 | 4.9E-05  |
| 7671 | 0.000253 | 4.73E-05 |
| 7739 | 0.000254 | 4.59E-05 |
| 7807 | 0.000253 | 4.71E-05 |
| 7875 | 0.000254 | 4.62E-05 |
| 7942 | 0.000255 | 4.53E-05 |
| 8010 | 0.000256 | 4.45E-05 |
| 8078 | 0.000257 | 4.26E-05 |
| 8146 | 0.000258 | 4.21E-05 |
| 8214 | 0.000258 | 4.25E-05 |
| 8281 | 0.000257 | 4.31E-05 |
| 8349 | 0.000258 | 4.18E-05 |
| 8417 | 0.000263 | 3.72E-05 |
| 8485 | 0.000261 | 3.94E-05 |
| 8553 | 0.00026  | 4E-05    |
| 8620 | 0.000262 | 3.78E-05 |
| 8688 | 0.000262 | 3.83E-05 |
| 8756 | 0.000262 | 3.8E-05  |
| 8824 | 0.000264 | 3.6E-05  |
| 8892 | 0.000264 | 3.62E-05 |
| 8960 | 0.000264 | 3.62E-05 |

|       |          |          |
|-------|----------|----------|
| 9028  | 0.000266 | 3.38E-05 |
| 9095  | 0.000266 | 3.4E-05  |
| 9163  | 0.000267 | 3.29E-05 |
| 9231  | 0.000266 | 3.41E-05 |
| 9299  | 0.000268 | 3.21E-05 |
| 9366  | 0.000269 | 3.13E-05 |
| 9434  | 0.000268 | 3.23E-05 |
| 9502  | 0.000269 | 3.14E-05 |
| 9570  | 0.000268 | 3.23E-05 |
| 9638  | 0.00027  | 2.97E-05 |
| 9706  | 0.000271 | 2.91E-05 |
| 9773  | 0.00027  | 2.96E-05 |
| 9841  | 0.00027  | 2.96E-05 |
| 9909  | 0.000272 | 2.81E-05 |
| 9977  | 0.000272 | 2.77E-05 |
| 10045 | 0.000272 | 2.84E-05 |
| 10112 | 0.000273 | 2.73E-05 |
| 10180 | 0.000274 | 2.64E-05 |
| 10248 | 0.000272 | 2.76E-05 |
| 10316 | 0.000273 | 2.69E-05 |
| 10383 | 0.000274 | 2.59E-05 |
| 10451 | 0.000273 | 2.68E-05 |
| 10519 | 0.000274 | 2.61E-05 |
| 10587 | 0.000275 | 2.54E-05 |
| 10655 | 0.000277 | 2.26E-05 |
| 10723 | 0.000277 | 2.32E-05 |
| 10790 | 0.000276 | 2.39E-05 |
| 10858 | 0.000278 | 2.21E-05 |
| 10926 | 0.000277 | 2.34E-05 |
| 10994 | 0.000277 | 2.29E-05 |
| 11061 | 0.000277 | 2.28E-05 |
| 11129 | 0.000279 | 2.13E-05 |
| 11197 | 0.000278 | 2.2E-05  |
| 11264 | 0.000279 | 2.08E-05 |
| 11332 | 0.00028  | 1.98E-05 |

|       |          |          |
|-------|----------|----------|
| 11400 | 0.000279 | 2.08E-05 |
| 11468 | 0.000279 | 2.15E-05 |
| 11536 | 0.000282 | 1.77E-05 |
| 11603 | 0.00028  | 2E-05    |
| 11671 | 0.000281 | 1.91E-05 |
| 11739 | 0.00028  | 2E-05    |
| 11807 | 0.00028  | 1.96E-05 |
| 11875 | 0.000281 | 1.85E-05 |
| 11942 | 0.000282 | 1.75E-05 |
| 12010 | 0.000282 | 1.82E-05 |
| 12078 | 0.000283 | 1.71E-05 |
| 12146 | 0.000282 | 1.78E-05 |
| 12213 | 0.000282 | 1.75E-05 |
| 12281 | 0.000281 | 1.89E-05 |
| 12349 | 0.000282 | 1.77E-05 |
| 12417 | 0.000284 | 1.62E-05 |
| 12484 | 0.000283 | 1.67E-05 |
| 12552 | 0.000283 | 1.65E-05 |

**Table S8.** Concentration of **1** and **2** as a function of the reaction time in the experiment where  $[4]_0=0.50$  mM,  $[TFA]_0=6.54$  M.

|             |                    |                 |             |             |          |             |             |          |             |             |          |
|-------------|--------------------|-----------------|-------------|-------------|----------|-------------|-------------|----------|-------------|-------------|----------|
| <b>480</b>  | <b>4.25576E-05</b> | <b>0.000437</b> | <b>2722</b> | 0.000197081 | 0.000283 | <b>4963</b> | 0.000297803 | 0.000182 | <b>7205</b> | 0.000362224 | 0.000118 |
| <b>549</b>  | 4.7873E-05         | 0.000432        | <b>2790</b> | 0.00020035  | 0.00028  | <b>5031</b> | 0.000298945 | 0.000181 | <b>7273</b> | 0.000363031 | 0.000117 |
| <b>617</b>  | 5.60841E-05        | 0.000424        | <b>2858</b> | 0.000204318 | 0.000276 | <b>5099</b> | 0.000302111 | 0.000178 | <b>7341</b> | 0.000364507 | 0.000115 |
| <b>685</b>  | 5.74664E-05        | 0.000423        | <b>2926</b> | 0.000206839 | 0.000273 | <b>5167</b> | 0.000302917 | 0.000177 | <b>7409</b> | 0.000365885 | 0.000114 |
| <b>752</b>  | 6.50421E-05        | 0.000415        | <b>2993</b> | 0.000210934 | 0.000269 | <b>5235</b> | 0.000305754 | 0.000174 | <b>7476</b> | 0.000368348 | 0.000112 |
| <b>820</b>  | 6.97627E-05        | 0.00041         | <b>3061</b> | 0.000215759 | 0.000264 | <b>5303</b> | 0.000308692 | 0.000171 | <b>7544</b> | 0.000368921 | 0.000111 |
| <b>888</b>  | 7.48103E-05        | 0.000405        | <b>3129</b> | 0.00021789  | 0.000262 | <b>5371</b> | 0.000310932 | 0.000169 | <b>7612</b> | 0.000369525 | 0.00011  |
| <b>956</b>  | 8.0565E-05         | 0.000399        | <b>3197</b> | 0.000221746 | 0.000258 | <b>5439</b> | 0.000312466 | 0.000168 | <b>7680</b> | 0.000372527 | 0.000107 |
| <b>1024</b> | 8.62788E-05        | 0.000394        | <b>3265</b> | 0.000225272 | 0.000255 | <b>5506</b> | 0.000316263 | 0.000164 | <b>7748</b> | 0.000373372 | 0.000107 |
| <b>1092</b> | 9.10604E-05        | 0.000389        | <b>3333</b> | 0.000228755 | 0.000251 | <b>5574</b> | 0.000316329 | 0.000164 | <b>7816</b> | 0.000375826 | 0.000104 |
| <b>1160</b> | 9.29663E-05        | 0.000387        | <b>3401</b> | 0.000231436 | 0.000249 | <b>5642</b> | 0.000320245 | 0.00016  | <b>7884</b> | 0.000377174 | 0.000103 |
| <b>1228</b> | 0.000102156        | 0.000378        | <b>3469</b> | 0.00023577  | 0.000244 | <b>5710</b> | 0.000322175 | 0.000158 | <b>7952</b> | 0.000376695 | 0.000103 |
| <b>1296</b> | 0.000105347        | 0.000375        | <b>3537</b> | 0.000238495 | 0.000242 | <b>5778</b> | 0.000323426 | 0.000157 | <b>8020</b> | 0.000379113 | 0.000101 |
| <b>1363</b> | 0.000110599        | 0.000369        | <b>3605</b> | 0.000241048 | 0.000239 | <b>5846</b> | 0.000326074 | 0.000154 | <b>8088</b> | 0.00037943  | 0.000101 |
| <b>1431</b> | 0.000116715        | 0.000363        | <b>3673</b> | 0.000244261 | 0.000236 | <b>5914</b> | 0.00033027  | 0.00015  | <b>8156</b> | 0.000381372 | 9.86E-05 |
| <b>1499</b> | 0.000121833        | 0.000358        | <b>3740</b> | 0.000248668 | 0.000231 | <b>5982</b> | 0.000329268 | 0.000151 | <b>8224</b> | 0.000381387 | 9.86E-05 |
| <b>1567</b> | 0.00012424         | 0.000356        | <b>3808</b> | 0.000252332 | 0.000228 | <b>6050</b> | 0.000331035 | 0.000149 | <b>8292</b> | 0.000384355 | 9.56E-05 |
| <b>1635</b> | 0.000130555        | 0.000349        | <b>3876</b> | 0.000254236 | 0.000226 | <b>6118</b> | 0.000333953 | 0.000146 | <b>8360</b> | 0.000383845 | 9.62E-05 |
| <b>1703</b> | 0.000134285        | 0.000346        | <b>3944</b> | 0.000256822 | 0.000223 | <b>6186</b> | 0.000337738 | 0.000142 | <b>8428</b> | 0.00038757  | 9.24E-05 |
| <b>1771</b> | 0.000138103        | 0.000342        | <b>4012</b> | 0.000258849 | 0.000221 | <b>6254</b> | 0.000338626 | 0.000141 | <b>8496</b> | 0.000386938 | 9.31E-05 |
| <b>1839</b> | 0.000143608        | 0.000336        | <b>4080</b> | 0.000261336 | 0.000219 | <b>6321</b> | 0.000339636 | 0.00014  | <b>8564</b> | 0.000389078 | 9.09E-05 |
| <b>1907</b> | 0.000147619        | 0.000332        | <b>4148</b> | 0.000264543 | 0.000215 | <b>6389</b> | 0.000341261 | 0.000139 | <b>8632</b> | 0.000389866 | 9.01E-05 |
| <b>1975</b> | 0.000151396        | 0.000329        | <b>4216</b> | 0.000267294 | 0.000213 | <b>6457</b> | 0.000342774 | 0.000137 | <b>8700</b> | 0.000391422 | 8.86E-05 |
| <b>2043</b> | 0.000156574        | 0.000323        | <b>4284</b> | 0.000270715 | 0.000209 | <b>6525</b> | 0.000345056 | 0.000135 | <b>8767</b> | 0.00039223  | 8.78E-05 |
| <b>2111</b> | 0.000160448        | 0.00032         | <b>4351</b> | 0.000274136 | 0.000206 | <b>6593</b> | 0.000344514 | 0.000135 | <b>8835</b> | 0.000391824 | 8.82E-05 |
| <b>2178</b> | 0.000164386        | 0.000316        | <b>4419</b> | 0.000276982 | 0.000203 | <b>6661</b> | 0.00034781  | 0.000132 | <b>8903</b> | 0.000395446 | 8.46E-05 |
| <b>2246</b> | 0.000168694        | 0.000311        | <b>4487</b> | 0.000279519 | 0.0002   | <b>6729</b> | 0.000351691 | 0.000128 | <b>8971</b> | 0.000395482 | 8.45E-05 |
| <b>2314</b> | 0.00017354         | 0.000306        | <b>4555</b> | 0.000281991 | 0.000198 | <b>6797</b> | 0.000350817 | 0.000129 | <b>9039</b> | 0.000395454 | 8.45E-05 |
| <b>2382</b> | 0.000177214        | 0.000303        | <b>4623</b> | 0.000285507 | 0.000194 | <b>6865</b> | 0.000354083 | 0.000126 | <b>9107</b> | 0.000397238 | 8.28E-05 |
| <b>2450</b> | 0.000181226        | 0.000299        | <b>4691</b> | 0.00028701  | 0.000193 | <b>6933</b> | 0.000355059 | 0.000125 | <b>9175</b> | 0.000397375 | 8.26E-05 |
| <b>2518</b> | 0.00018377         | 0.000296        | <b>4759</b> | 0.000289081 | 0.000191 | <b>7001</b> | 0.000358237 | 0.000122 | <b>9243</b> | 0.000400353 | 7.96E-05 |
| <b>2586</b> | 0.000188827        | 0.000291        | <b>4827</b> | 0.000291882 | 0.000188 | <b>7069</b> | 0.000359582 | 0.00012  | <b>9311</b> | 0.000400104 | 7.99E-05 |
| <b>2654</b> | 0.000193182        | 0.000287        | <b>4895</b> | 0.00029467  | 0.000185 | <b>7137</b> | 0.000360514 | 0.000119 | <b>9379</b> | 0.000403395 | 7.66E-05 |

|       |             |          |
|-------|-------------|----------|
| 9447  | 0.000403998 | 7.6E-05  |
| 9515  | 0.000405574 | 7.44E-05 |
| 9583  | 0.000406334 | 7.37E-05 |
| 9651  | 0.000404996 | 7.5E-05  |
| 9719  | 0.000406772 | 7.32E-05 |
| 9787  | 0.000408137 | 7.19E-05 |
| 9855  | 0.000408853 | 7.11E-05 |
| 9923  | 0.000409622 | 7.04E-05 |
| 9991  | 0.000409179 | 7.08E-05 |
| 10059 | 0.000412261 | 6.77E-05 |
| 10127 | 0.000410831 | 6.92E-05 |
| 10195 | 0.000410797 | 6.92E-05 |
| 10263 | 0.00041448  | 6.55E-05 |
| 10330 | 0.000416021 | 6.4E-05  |
| 10399 | 0.000415332 | 6.47E-05 |
| 10466 | 0.000417357 | 6.26E-05 |
| 10534 | 0.000416352 | 6.36E-05 |
| 10602 | 0.000417245 | 6.28E-05 |
| 10670 | 0.000418743 | 6.13E-05 |
| 10738 | 0.000420267 | 5.97E-05 |
| 10806 | 0.000420164 | 5.98E-05 |
| 10874 | 0.00042306  | 5.69E-05 |
| 10942 | 0.000422809 | 5.72E-05 |
| 11010 | 0.000422802 | 5.72E-05 |
| 11078 | 0.000421692 | 5.83E-05 |
| 11146 | 0.000425409 | 5.46E-05 |
| 11214 | 0.000423865 | 5.61E-05 |
| 11282 | 0.000427427 | 5.26E-05 |
| 11349 | 0.000425457 | 5.45E-05 |
| 11417 | 0.00042814  | 5.19E-05 |
| 11485 | 0.000428586 | 5.14E-05 |
| 11553 | 0.000427746 | 5.23E-05 |
| 11621 | 0.000429524 | 5.05E-05 |
| 11689 | 0.00042768  | 5.23E-05 |
| 11757 | 0.000432458 | 4.75E-05 |
| 11825 | 0.000432301 | 4.77E-05 |
| 11893 | 0.000432156 | 4.78E-05 |
| 11961 | 0.000433292 | 4.67E-05 |

|       |             |          |
|-------|-------------|----------|
| 12029 | 0.000432875 | 4.71E-05 |
| 12097 | 0.000434536 | 4.55E-05 |
| 12165 | 0.000432828 | 4.72E-05 |
| 12233 | 0.000434205 | 4.58E-05 |
| 12301 | 0.000434811 | 4.52E-05 |
| 12369 | 0.000433702 | 4.63E-05 |
| 12437 | 0.000436346 | 4.37E-05 |
| 12505 | 0.000436805 | 4.32E-05 |
| 12573 | 0.00043964  | 4.04E-05 |
| 12640 | 0.000438159 | 4.18E-05 |
| 12708 | 0.000438007 | 4.2E-05  |
| 12776 | 0.000439836 | 4.02E-05 |
| 12844 | 0.000439633 | 4.04E-05 |
| 12912 | 0.00044064  | 3.94E-05 |
| 12980 | 0.000440208 | 3.98E-05 |
| 13048 | 0.000438963 | 4.1E-05  |
| 13116 | 0.00044286  | 3.71E-05 |
| 13184 | 0.000441152 | 3.88E-05 |
| 13252 | 0.000441902 | 3.81E-05 |
| 13320 | 0.000442519 | 3.75E-05 |
| 13388 | 0.000441586 | 3.84E-05 |
| 13456 | 0.00044287  | 3.71E-05 |
| 13524 | 0.000443728 | 3.63E-05 |
| 13592 | 0.000445095 | 3.49E-05 |
| 13660 | 0.000447088 | 3.29E-05 |
| 13727 | 0.000445236 | 3.48E-05 |
| 13795 | 0.000446934 | 3.31E-05 |
| 13863 | 0.000445077 | 3.49E-05 |
| 13931 | 0.000447444 | 3.26E-05 |
| 13999 | 0.000444635 | 3.54E-05 |
| 14067 | 0.000446288 | 3.37E-05 |
| 14135 | 0.000447847 | 3.22E-05 |
| 14203 | 0.000446763 | 3.32E-05 |
| 14271 | 0.000447081 | 3.29E-05 |
| 14338 | 0.000447595 | 3.24E-05 |
| 14406 | 0.000447556 | 3.24E-05 |
| 14474 | 0.000450943 | 2.91E-05 |
| 14542 | 0.000449958 | 3E-05    |

|       |             |          |
|-------|-------------|----------|
| 14610 | 0.000449933 | 3.01E-05 |
| 14678 | 0.000448561 | 3.14E-05 |
| 14746 | 0.000449319 | 3.07E-05 |
| 14814 | 0.000449894 | 3.01E-05 |
| 14882 | 0.000454312 | 2.57E-05 |
| 14950 | 0.000453038 | 2.7E-05  |
| 15018 | 0.000453453 | 2.65E-05 |
| 15086 | 0.000452047 | 2.8E-05  |
| 15154 | 0.000453096 | 2.69E-05 |
| 15222 | 0.000454223 | 2.58E-05 |
| 15290 | 0.00045314  | 2.69E-05 |
| 15357 | 0.000452356 | 2.76E-05 |
| 15425 | 0.000452738 | 2.73E-05 |
| 15493 | 0.000454938 | 2.51E-05 |
| 15561 | 0.000454574 | 2.54E-05 |
| 15629 | 0.000455347 | 2.47E-05 |
| 15697 | 0.000454937 | 2.51E-05 |
| 15765 | 0.00045363  | 2.64E-05 |
| 15833 | 0.000455703 | 2.43E-05 |
| 15901 | 0.000456033 | 2.4E-05  |
| 15969 | 0.000456052 | 2.39E-05 |
| 16037 | 0.000459543 | 2.05E-05 |
| 16105 | 0.000456094 | 2.39E-05 |
| 16173 | 0.000456359 | 2.36E-05 |
| 16241 | 0.000458504 | 2.15E-05 |
| 16308 | 0.00045833  | 2.17E-05 |
| 16376 | 0.000458493 | 2.15E-05 |
| 16444 | 0.000457688 | 2.23E-05 |
| 16512 | 0.000459215 | 2.08E-05 |
| 16580 | 0.000456582 | 2.34E-05 |
| 16648 | 0.000460092 | 1.99E-05 |
| 16716 | 0.000457423 | 2.26E-05 |
| 16784 | 0.000458413 | 2.16E-05 |
| 16852 | 0.000460455 | 1.95E-05 |
| 16920 | 0.000459167 | 2.08E-05 |
| 16988 | 0.000460131 | 1.99E-05 |
| 17056 | 0.000461701 | 1.83E-05 |
| 17124 | 0.000463477 | 1.65E-05 |

|       |             |          |
|-------|-------------|----------|
| 17192 | 0.00046211  | 1.79E-05 |
| 17259 | 0.00046062  | 1.94E-05 |
| 17327 | 0.000462626 | 1.74E-05 |
| 17395 | 0.000462931 | 1.71E-05 |
| 17463 | 0.000462296 | 1.77E-05 |
| 17531 | 0.000462254 | 1.77E-05 |
| 17599 | 0.000463219 | 1.68E-05 |
| 17667 | 0.000464005 | 1.6E-05  |
| 17735 | 0.000464044 | 1.6E-05  |
| 17803 | 0.000460548 | 1.95E-05 |
| 17871 | 0.000462479 | 1.75E-05 |
| 17939 | 0.000464763 | 1.52E-05 |
| 18007 | 0.000463043 | 1.7E-05  |
| 18075 | 0.000460469 | 1.95E-05 |
| 18142 | 0.000462328 | 1.77E-05 |
| 18210 | 0.000463242 | 1.68E-05 |
| 18278 | 0.000463014 | 1.7E-05  |
| 18346 | 0.000465042 | 1.5E-05  |
| 18414 | 0.000463549 | 1.65E-05 |
| 18482 | 0.000461159 | 1.88E-05 |
| 18550 | 0.000466792 | 1.32E-05 |
| 18618 | 0.000463552 | 1.64E-05 |
| 18686 | 0.000463383 | 1.66E-05 |
| 18754 | 0.000468457 | 1.15E-05 |
| 18822 | 0.000462858 | 1.71E-05 |
| 18889 | 0.00046492  | 1.51E-05 |
| 18957 | 0.000468276 | 1.17E-05 |
| 19025 | 0.000466104 | 1.39E-05 |
| 19093 | 0.000467496 | 1.25E-05 |
| 19161 | 0.000468203 | 1.18E-05 |
| 19229 | 0.000465168 | 1.48E-05 |
| 19297 | 0.000467606 | 1.24E-05 |
| 19365 | 0.000469267 | 1.07E-05 |
| 19433 | 0.000468346 | 1.17E-05 |
| 19501 | 0.00046701  | 1.3E-05  |
| 19568 | 0.000466273 | 1.37E-05 |
| 19636 | 0.000469671 | 1.03E-05 |
| 19704 | 0.000466729 | 1.33E-05 |



**Table S9.** Concentration of **1** and **2** as a function of time (real time <sup>1</sup>H NMR measurement, Figure S28) in the experiment where [4]<sub>0</sub>=0.99 mM, [TFA]<sub>0</sub>=6.54 M.

| time [s]: | [1], M   | [2], M   |
|-----------|----------|----------|
| 420       | 5.49E-05 | 0.00093  |
| 488       | 6.46E-05 | 0.00092  |
| 556       | 6.96E-05 | 0.000915 |
| 623       | 8.16E-05 | 0.000903 |
| 691       | 8.98E-05 | 0.000895 |
| 759       | 9.95E-05 | 0.000886 |
| 827       | 0.000103 | 0.000882 |
| 895       | 0.000114 | 0.000871 |
| 962       | 0.000123 | 0.000862 |
| 1030      | 0.000131 | 0.000854 |
| 1098      | 0.000142 | 0.000843 |
| 1166      | 0.00015  | 0.000835 |
| 1233      | 0.000156 | 0.000829 |
| 1301      | 0.000165 | 0.00082  |
| 1369      | 0.000174 | 0.000811 |
| 1437      | 0.000186 | 0.000799 |
| 1505      | 0.000191 | 0.000794 |
| 1573      | 0.000198 | 0.000787 |
| 1641      | 0.000206 | 0.000779 |
| 1709      | 0.000213 | 0.000772 |
| 1777      | 0.000219 | 0.000766 |
| 1845      | 0.00023  | 0.000755 |
| 1913      | 0.000237 | 0.000748 |
| 1980      | 0.000243 | 0.000742 |
| 2048      | 0.000251 | 0.000734 |
| 2116      | 0.000259 | 0.000726 |
| 2184      | 0.000264 | 0.000721 |
| 2252      | 0.000273 | 0.000712 |
| 2320      | 0.000279 | 0.000706 |
| 2388      | 0.000287 | 0.000698 |
| 2455      | 0.000294 | 0.000691 |

|      |          |          |
|------|----------|----------|
| 2523 | 0.000302 | 0.000683 |
| 2591 | 0.000306 | 0.000679 |
| 2659 | 0.000316 | 0.000669 |
| 2727 | 0.000323 | 0.000662 |
| 2795 | 0.000328 | 0.000657 |
| 2863 | 0.000337 | 0.000648 |
| 2931 | 0.000341 | 0.000644 |
| 2999 | 0.000349 | 0.000636 |
| 3067 | 0.000355 | 0.00063  |
| 3135 | 0.000362 | 0.000623 |
| 3202 | 0.000366 | 0.000619 |
| 3270 | 0.000374 | 0.000611 |
| 3338 | 0.00038  | 0.000605 |
| 3406 | 0.000385 | 0.0006   |
| 3474 | 0.000392 | 0.000593 |
| 3542 | 0.000398 | 0.000587 |
| 3610 | 0.000402 | 0.000583 |
| 3678 | 0.000411 | 0.000574 |
| 3746 | 0.000415 | 0.00057  |
| 3814 | 0.00042  | 0.000565 |
| 3881 | 0.000425 | 0.00056  |
| 3949 | 0.000432 | 0.000553 |
| 4017 | 0.000439 | 0.000546 |
| 4085 | 0.000443 | 0.000542 |
| 4153 | 0.000447 | 0.000538 |
| 4221 | 0.000454 | 0.000531 |
| 4288 | 0.000459 | 0.000526 |
| 4356 | 0.000464 | 0.000521 |
| 4424 | 0.000469 | 0.000516 |
| 4492 | 0.000477 | 0.000508 |
| 4559 | 0.00048  | 0.000505 |
| 4627 | 0.000485 | 0.0005   |

|      |          |          |
|------|----------|----------|
| 4695 | 0.000491 | 0.000494 |
| 4763 | 0.000495 | 0.00049  |
| 4831 | 0.0005   | 0.000485 |
| 4899 | 0.000505 | 0.00048  |
| 4967 | 0.00051  | 0.000475 |
| 5035 | 0.000517 | 0.000468 |
| 5103 | 0.00052  | 0.000465 |
| 5170 | 0.000525 | 0.00046  |
| 5238 | 0.000528 | 0.000457 |
| 5306 | 0.000533 | 0.000452 |
| 5374 | 0.000539 | 0.000446 |
| 5442 | 0.000543 | 0.000442 |
| 5509 | 0.000546 | 0.000439 |
| 5577 | 0.000552 | 0.000433 |
| 5645 | 0.000556 | 0.000429 |
| 5713 | 0.000561 | 0.000424 |
| 5780 | 0.000566 | 0.000419 |
| 5848 | 0.00057  | 0.000415 |
| 5916 | 0.000575 | 0.00041  |
| 5984 | 0.000577 | 0.000408 |
| 6052 | 0.000584 | 0.000401 |
| 6120 | 0.000586 | 0.000399 |
| 6188 | 0.000589 | 0.000396 |
| 6256 | 0.000593 | 0.000392 |
| 6323 | 0.000598 | 0.000387 |
| 6391 | 0.000602 | 0.000383 |
| 6459 | 0.000604 | 0.000381 |
| 6527 | 0.00061  | 0.000375 |
| 6595 | 0.000613 | 0.000372 |
| 6663 | 0.000616 | 0.000369 |
| 6731 | 0.000621 | 0.000364 |
| 6799 | 0.000624 | 0.000361 |

|      |          |          |
|------|----------|----------|
| 6866 | 0.000629 | 0.000356 |
| 6934 | 0.000631 | 0.000354 |
| 7002 | 0.000636 | 0.000349 |
| 7070 | 0.000638 | 0.000347 |
| 7137 | 0.000643 | 0.000342 |
| 7205 | 0.000645 | 0.00034  |
| 7273 | 0.000649 | 0.000336 |
| 7341 | 0.000652 | 0.000333 |
| 7409 | 0.000656 | 0.000329 |
| 7476 | 0.000659 | 0.000326 |
| 7544 | 0.000662 | 0.000323 |
| 7612 | 0.000664 | 0.000321 |
| 7680 | 0.000667 | 0.000318 |
| 7748 | 0.000672 | 0.000313 |
| 7816 | 0.000676 | 0.000309 |
| 7884 | 0.000677 | 0.000308 |
| 7952 | 0.000681 | 0.000304 |
| 8020 | 0.000684 | 0.000301 |
| 8088 | 0.000687 | 0.000298 |
| 8156 | 0.00069  | 0.000295 |
| 8223 | 0.000692 | 0.000293 |
| 8292 | 0.000695 | 0.00029  |
| 8360 | 0.000699 | 0.000286 |
| 8428 | 0.000702 | 0.000283 |
| 8496 | 0.000704 | 0.000281 |
| 8563 | 0.000708 | 0.000277 |
| 8631 | 0.000711 | 0.000274 |
| 8699 | 0.000712 | 0.000273 |
| 8767 | 0.000715 | 0.00027  |
| 8835 | 0.000717 | 0.000268 |
| 8902 | 0.000721 | 0.000264 |
| 8970 | 0.000724 | 0.000261 |

|       |          |          |
|-------|----------|----------|
| 9038  | 0.000725 | 0.00026  |
| 9106  | 0.000728 | 0.000257 |
| 9174  | 0.000732 | 0.000253 |
| 9242  | 0.000732 | 0.000253 |
| 9310  | 0.000735 | 0.00025  |
| 9377  | 0.000739 | 0.000246 |
| 9445  | 0.00074  | 0.000245 |
| 9513  | 0.000744 | 0.000241 |
| 9581  | 0.000746 | 0.000239 |
| 9648  | 0.000749 | 0.000236 |
| 9716  | 0.000749 | 0.000236 |
| 9784  | 0.000753 | 0.000232 |
| 9852  | 0.000755 | 0.00023  |
| 9920  | 0.000756 | 0.000229 |
| 9988  | 0.000759 | 0.000226 |
| 10055 | 0.000761 | 0.000224 |
| 10123 | 0.000765 | 0.00022  |
| 10191 | 0.000765 | 0.00022  |
| 10259 | 0.000768 | 0.000217 |
| 10327 | 0.00077  | 0.000215 |
| 10395 | 0.000773 | 0.000212 |
| 10463 | 0.000774 | 0.000211 |
| 10531 | 0.000776 | 0.000209 |
| 10599 | 0.000778 | 0.000207 |
| 10666 | 0.000781 | 0.000204 |
| 10734 | 0.000782 | 0.000203 |
| 10802 | 0.000784 | 0.000201 |
| 10870 | 0.000787 | 0.000198 |
| 10937 | 0.000788 | 0.000197 |
| 11005 | 0.000791 | 0.000194 |
| 11073 | 0.000791 | 0.000194 |
| 11141 | 0.000795 | 0.00019  |
| 11209 | 0.000795 | 0.00019  |
| 11277 | 0.000797 | 0.000188 |
| 11345 | 0.0008   | 0.000185 |

|       |          |          |
|-------|----------|----------|
| 11412 | 0.000801 | 0.000184 |
| 11480 | 0.000803 | 0.000182 |
| 11548 | 0.000805 | 0.00018  |
| 11616 | 0.000807 | 0.000178 |
| 11684 | 0.000811 | 0.000174 |
| 11752 | 0.000811 | 0.000174 |
| 11819 | 0.000811 | 0.000174 |
| 11887 | 0.000814 | 0.000171 |
| 11955 | 0.000815 | 0.00017  |
| 12023 | 0.000816 | 0.000169 |
| 12090 | 0.000818 | 0.000167 |
| 12158 | 0.00082  | 0.000165 |
| 12226 | 0.000823 | 0.000162 |
| 12294 | 0.000823 | 0.000162 |
| 12362 | 0.000824 | 0.000161 |
| 12430 | 0.000827 | 0.000158 |
| 12498 | 0.000826 | 0.000159 |
| 12565 | 0.000831 | 0.000154 |
| 12633 | 0.00083  | 0.000155 |
| 12701 | 0.000832 | 0.000153 |
| 12769 | 0.000835 | 0.00015  |
| 12837 | 0.000834 | 0.000151 |
| 12905 | 0.000837 | 0.000148 |
| 12973 | 0.000839 | 0.000146 |
| 13040 | 0.000839 | 0.000146 |
| 13108 | 0.000841 | 0.000144 |
| 13176 | 0.000842 | 0.000143 |
| 13244 | 0.000844 | 0.000141 |
| 13312 | 0.000845 | 0.00014  |
| 13380 | 0.000846 | 0.000139 |
| 13448 | 0.000847 | 0.000138 |
| 13516 | 0.000847 | 0.000138 |
| 13584 | 0.000851 | 0.000134 |
| 13652 | 0.000852 | 0.000133 |
| 13720 | 0.000853 | 0.000132 |

|       |          |          |
|-------|----------|----------|
| 13788 | 0.000855 | 0.00013  |
| 13856 | 0.000856 | 0.000129 |
| 13923 | 0.000856 | 0.000129 |
| 13991 | 0.000857 | 0.000128 |
| 14059 | 0.000859 | 0.000126 |
| 14127 | 0.00086  | 0.000125 |
| 14195 | 0.00086  | 0.000125 |
| 14263 | 0.000862 | 0.000123 |
| 14331 | 0.000864 | 0.000121 |
| 14399 | 0.000864 | 0.000121 |
| 14467 | 0.000866 | 0.000119 |
| 14534 | 0.000867 | 0.000118 |
| 14602 | 0.000869 | 0.000116 |
| 14670 | 0.000871 | 0.000114 |
| 14738 | 0.000871 | 0.000114 |
| 14806 | 0.000872 | 0.000113 |
| 14874 | 0.000873 | 0.000112 |
| 14942 | 0.000873 | 0.000112 |
| 15010 | 0.000875 | 0.00011  |
| 15078 | 0.000875 | 0.00011  |
| 15146 | 0.000877 | 0.000108 |
| 15213 | 0.000876 | 0.000109 |
| 15281 | 0.000877 | 0.000108 |
| 15349 | 0.00088  | 0.000105 |
| 15417 | 0.00088  | 0.000105 |
| 15485 | 0.000882 | 0.000103 |
| 15552 | 0.000881 | 0.000104 |
| 15620 | 0.000881 | 0.000104 |
| 15688 | 0.000885 | 9.96E-05 |
| 15756 | 0.000886 | 9.95E-05 |
| 15824 | 0.000886 | 9.88E-05 |
| 15892 | 0.000888 | 9.69E-05 |
| 15960 | 0.000889 | 9.65E-05 |
| 16028 | 0.000888 | 9.66E-05 |
| 16096 | 0.00089  | 9.52E-05 |

|       |          |          |
|-------|----------|----------|
| 16164 | 0.000892 | 9.26E-05 |
| 16232 | 0.000891 | 9.44E-05 |

**Table S10.** Concentration of **1** and **2** as a function of time (real time <sup>1</sup>H NMR measurement, Figure S28) in the experiment where [4]<sub>0</sub>=1.92 mM, [TFA]<sub>0</sub>=6.54 M.

| time [s]: | [1], M   | [2], M   |
|-----------|----------|----------|
| 480       | 7.21E-05 | 0.001851 |
| 548       | 8.02E-05 | 0.001843 |
| 616       | 9.3E-05  | 0.001831 |
| 684       | 0.000109 | 0.001816 |
| 752       | 0.00012  | 0.001805 |
| 820       | 0.000132 | 0.001793 |
| 887       | 0.000146 | 0.00178  |
| 955       | 0.000159 | 0.001768 |
| 1023      | 0.000171 | 0.001756 |
| 1091      | 0.000181 | 0.001747 |
| 1159      | 0.000198 | 0.00173  |
| 1227      | 0.000208 | 0.00172  |
| 1295      | 0.000222 | 0.001707 |
| 1363      | 0.000236 | 0.001694 |
| 1430      | 0.000245 | 0.001685 |
| 1498      | 0.00026  | 0.00167  |
| 1566      | 0.000273 | 0.001658 |
| 1634      | 0.000285 | 0.001647 |
| 1702      | 0.000296 | 0.001636 |
| 1770      | 0.000312 | 0.001621 |
| 1838      | 0.000322 | 0.001611 |
| 1906      | 0.000333 | 0.0016   |
| 1973      | 0.000347 | 0.001587 |
| 2041      | 0.000356 | 0.001579 |
| 2109      | 0.000371 | 0.001563 |
| 2177      | 0.000383 | 0.001552 |
| 2245      | 0.000394 | 0.001542 |
| 2313      | 0.000405 | 0.001531 |
| 2381      | 0.000416 | 0.00152  |
| 2448      | 0.00043  | 0.001507 |
| 2517      | 0.000441 | 0.001496 |

|      |          |          |
|------|----------|----------|
| 2584 | 0.000455 | 0.001483 |
| 2652 | 0.000464 | 0.001474 |
| 2720 | 0.000476 | 0.001463 |
| 2788 | 0.000487 | 0.001453 |
| 2856 | 0.000501 | 0.001439 |
| 2924 | 0.000511 | 0.001429 |
| 2992 | 0.000521 | 0.001419 |
| 3060 | 0.000531 | 0.00141  |
| 3127 | 0.000542 | 0.0014   |
| 3195 | 0.000555 | 0.001387 |
| 3263 | 0.000565 | 0.001377 |
| 3331 | 0.000574 | 0.001369 |
| 3399 | 0.000587 | 0.001357 |
| 3467 | 0.000597 | 0.001347 |
| 3535 | 0.000606 | 0.001338 |
| 3602 | 0.000618 | 0.001327 |
| 3671 | 0.000629 | 0.001316 |
| 3738 | 0.000637 | 0.001308 |
| 3806 | 0.00065  | 0.001296 |
| 3874 | 0.000661 | 0.001285 |
| 3942 | 0.000669 | 0.001278 |
| 4010 | 0.00068  | 0.001267 |
| 4077 | 0.000691 | 0.001256 |
| 4145 | 0.000698 | 0.00125  |
| 4213 | 0.00071  | 0.001238 |
| 4281 | 0.00072  | 0.001229 |
| 4349 | 0.00073  | 0.001219 |
| 4417 | 0.00074  | 0.00121  |
| 4485 | 0.000748 | 0.001202 |
| 4553 | 0.000759 | 0.001192 |
| 4621 | 0.000767 | 0.001184 |
| 4689 | 0.000778 | 0.001173 |

|      |          |          |
|------|----------|----------|
| 4756 | 0.000788 | 0.001164 |
| 4824 | 0.000797 | 0.001154 |
| 4892 | 0.000805 | 0.001147 |
| 5028 | 0.000824 | 0.001129 |
| 5096 | 0.000834 | 0.001119 |
| 5164 | 0.00084  | 0.001113 |
| 5232 | 0.000849 | 0.001105 |
| 5300 | 0.00086  | 0.001095 |
| 5368 | 0.000869 | 0.001086 |
| 5436 | 0.000878 | 0.001077 |
| 5503 | 0.000886 | 0.001069 |
| 5571 | 0.000894 | 0.001062 |
| 5639 | 0.0009   | 0.001056 |
| 5707 | 0.000912 | 0.001045 |
| 5775 | 0.00092  | 0.001036 |
| 5843 | 0.000935 | 0.001022 |
| 5911 | 0.000934 | 0.001023 |
| 5979 | 0.000944 | 0.001014 |
| 6047 | 0.000951 | 0.001007 |
| 6114 | 0.000962 | 0.000997 |
| 6182 | 0.000965 | 0.000993 |
| 6250 | 0.000975 | 0.000984 |
| 6318 | 0.000984 | 0.000975 |
| 6386 | 0.000992 | 0.000967 |
| 6454 | 0.000999 | 0.000961 |
| 6522 | 0.001004 | 0.000956 |
| 6590 | 0.001013 | 0.000948 |
| 6658 | 0.001022 | 0.000939 |
| 6726 | 0.001029 | 0.000933 |
| 6794 | 0.001037 | 0.000924 |
| 6861 | 0.001044 | 0.000918 |
| 6929 | 0.001052 | 0.00091  |

|      |          |          |
|------|----------|----------|
| 6997 | 0.001059 | 0.000903 |
| 7065 | 0.001065 | 0.000897 |
| 7133 | 0.001072 | 0.000891 |
| 7201 | 0.00108  | 0.000884 |
| 7269 | 0.001088 | 0.000876 |
| 7337 | 0.001094 | 0.00087  |
| 7405 | 0.001101 | 0.000863 |
| 7472 | 0.001107 | 0.000857 |
| 7540 | 0.001114 | 0.00085  |
| 7609 | 0.001121 | 0.000844 |
| 7676 | 0.001128 | 0.000837 |
| 7744 | 0.001134 | 0.000831 |
| 7812 | 0.00114  | 0.000825 |
| 7880 | 0.00115  | 0.000816 |
| 7948 | 0.001155 | 0.000812 |
| 8016 | 0.001161 | 0.000806 |
| 8084 | 0.001167 | 0.000799 |
| 8152 | 0.001174 | 0.000793 |
| 8220 | 0.001182 | 0.000786 |
| 8288 | 0.001189 | 0.000779 |
| 8356 | 0.001193 | 0.000774 |
| 8424 | 0.001198 | 0.00077  |
| 8492 | 0.001207 | 0.000761 |
| 8560 | 0.00121  | 0.000759 |
| 8627 | 0.001216 | 0.000753 |
| 8695 | 0.001224 | 0.000745 |
| 8763 | 0.001228 | 0.000741 |
| 8831 | 0.001235 | 0.000734 |
| 8899 | 0.001243 | 0.000727 |
| 8967 | 0.001246 | 0.000724 |
| 9035 | 0.001253 | 0.000718 |
| 9103 | 0.001259 | 0.000711 |

|       |          |          |
|-------|----------|----------|
| 9171  | 0.001264 | 0.000707 |
| 9238  | 0.001268 | 0.000703 |
| 9306  | 0.001274 | 0.000697 |
| 9374  | 0.001278 | 0.000693 |
| 9442  | 0.001285 | 0.000687 |
| 9510  | 0.00129  | 0.000682 |
| 9578  | 0.001299 | 0.000673 |
| 9646  | 0.001301 | 0.000671 |
| 9714  | 0.001305 | 0.000667 |
| 9781  | 0.00131  | 0.000662 |
| 9849  | 0.001317 | 0.000656 |
| 9917  | 0.001319 | 0.000653 |
| 9985  | 0.001328 | 0.000645 |
| 10053 | 0.001334 | 0.000639 |
| 10121 | 0.001337 | 0.000636 |
| 10189 | 0.001341 | 0.000633 |
| 10257 | 0.001348 | 0.000626 |
| 10325 | 0.001352 | 0.000622 |
| 10392 | 0.001357 | 0.000618 |
| 10460 | 0.001362 | 0.000613 |
| 10528 | 0.001366 | 0.000609 |
| 10596 | 0.001372 | 0.000603 |
| 10664 | 0.001374 | 0.000601 |
| 10732 | 0.001381 | 0.000594 |
| 10800 | 0.001384 | 0.000591 |
| 10868 | 0.001391 | 0.000585 |
| 10936 | 0.001394 | 0.000582 |
| 11004 | 0.001399 | 0.000577 |
| 11072 | 0.001403 | 0.000573 |
| 11139 | 0.001409 | 0.000568 |
| 11207 | 0.001411 | 0.000565 |
| 11275 | 0.001416 | 0.000561 |
| 11343 | 0.001421 | 0.000556 |
| 11411 | 0.001425 | 0.000552 |
| 11479 | 0.001431 | 0.000546 |

|       |          |          |
|-------|----------|----------|
| 11547 | 0.001433 | 0.000545 |
| 11615 | 0.001439 | 0.000538 |
| 11683 | 0.001443 | 0.000535 |
| 11751 | 0.001448 | 0.00053  |
| 11819 | 0.001448 | 0.00053  |
| 11887 | 0.001455 | 0.000523 |
| 11954 | 0.001459 | 0.00052  |
| 12022 | 0.001466 | 0.000512 |
| 12090 | 0.001468 | 0.000511 |
| 12158 | 0.001473 | 0.000506 |
| 12226 | 0.001476 | 0.000503 |
| 12294 | 0.00148  | 0.0005   |
| 12362 | 0.001483 | 0.000497 |
| 12430 | 0.001487 | 0.000493 |
| 12498 | 0.001493 | 0.000487 |
| 12565 | 0.001493 | 0.000487 |
| 12633 | 0.001496 | 0.000483 |
| 12701 | 0.0015   | 0.00048  |
| 12769 | 0.001504 | 0.000476 |
| 12837 | 0.001508 | 0.000473 |
| 12905 | 0.001513 | 0.000467 |
| 12973 | 0.001514 | 0.000466 |
| 13041 | 0.001518 | 0.000463 |
| 13109 | 0.001523 | 0.000458 |
| 13177 | 0.001526 | 0.000455 |
| 13245 | 0.001532 | 0.00045  |
| 13312 | 0.001533 | 0.000448 |
| 13380 | 0.001538 | 0.000443 |
| 13448 | 0.001538 | 0.000444 |
| 13516 | 0.001543 | 0.000439 |
| 13584 | 0.001546 | 0.000436 |
| 13652 | 0.001549 | 0.000433 |
| 13720 | 0.001554 | 0.000428 |
| 13788 | 0.001557 | 0.000425 |
| 13856 | 0.001562 | 0.00042  |

|       |          |          |
|-------|----------|----------|
| 13924 | 0.001564 | 0.000418 |
| 13992 | 0.001566 | 0.000416 |
| 14059 | 0.001569 | 0.000414 |
| 14127 | 0.001572 | 0.000411 |
| 14195 | 0.001576 | 0.000407 |
| 14263 | 0.00158  | 0.000403 |
| 14331 | 0.001583 | 0.0004   |
| 14399 | 0.001588 | 0.000395 |
| 14466 | 0.001584 | 0.0004   |
| 14534 | 0.001593 | 0.000391 |
| 14602 | 0.001595 | 0.000389 |
| 14670 | 0.001597 | 0.000387 |
| 14738 | 0.001599 | 0.000385 |
| 14806 | 0.001602 | 0.000382 |
| 14874 | 0.001607 | 0.000377 |
| 14942 | 0.00161  | 0.000374 |
| 15010 | 0.001613 | 0.000372 |
| 15078 | 0.001614 | 0.000371 |
| 15146 | 0.001616 | 0.000369 |
| 15213 | 0.001621 | 0.000364 |
| 15281 | 0.001622 | 0.000363 |
| 15349 | 0.001629 | 0.000357 |
| 15417 | 0.001627 | 0.000358 |
| 15485 | 0.00163  | 0.000355 |
| 15553 | 0.001632 | 0.000354 |
| 15621 | 0.001638 | 0.000347 |
| 15689 | 0.001639 | 0.000347 |
| 15756 | 0.00164  | 0.000345 |
| 15824 | 0.001646 | 0.00034  |
| 15892 | 0.001648 | 0.000338 |
| 15960 | 0.001648 | 0.000338 |
| 16028 | 0.001652 | 0.000334 |
| 16096 | 0.001655 | 0.000331 |
| 16164 | 0.001655 | 0.000331 |
| 16232 | 0.00166  | 0.000326 |

|       |          |          |
|-------|----------|----------|
| 16300 | 0.00166  | 0.000326 |
| 16368 | 0.001664 | 0.000323 |
| 16436 | 0.001664 | 0.000322 |

**Table S11.** Concentration of **1** and **2** as a function of time (real time <sup>1</sup>H NMR measurement, Figure S28) in the experiment where [4]<sub>0</sub>=3.83 mM, [TFA]<sub>0</sub>=6.54 M.

| time [s]: | [1], M   | [2], M   |
|-----------|----------|----------|
| 600       | 0.000131 | 0.003699 |
| 666       | 0.000139 | 0.003691 |
| 732       | 0.000157 | 0.003673 |
| 798       | 0.000178 | 0.003652 |
| 863       | 0.000192 | 0.003638 |
| 929       | 0.000214 | 0.003616 |
| 995       | 0.000232 | 0.003598 |
| 1061      | 0.000242 | 0.003588 |
| 1127      | 0.000266 | 0.003564 |
| 1193      | 0.000271 | 0.003559 |
| 1259      | 0.000305 | 0.003525 |
| 1325      | 0.000303 | 0.003527 |
| 1391      | 0.000333 | 0.003497 |
| 1457      | 0.000341 | 0.003489 |
| 1523      | 0.000358 | 0.003472 |
| 1588      | 0.000381 | 0.003449 |
| 1654      | 0.000409 | 0.003421 |
| 1720      | 0.00042  | 0.00341  |
| 1786      | 0.000433 | 0.003397 |
| 1852      | 0.000457 | 0.003373 |
| 1918      | 0.000472 | 0.003358 |
| 1984      | 0.000489 | 0.003341 |
| 2050      | 0.000511 | 0.003319 |
| 2116      | 0.000525 | 0.003305 |
| 2181      | 0.000538 | 0.003292 |
| 2247      | 0.00056  | 0.00327  |
| 2313      | 0.000579 | 0.003251 |
| 2379      | 0.000599 | 0.003231 |
| 2445      | 0.000615 | 0.003215 |
| 2511      | 0.000632 | 0.003198 |
| 2577      | 0.000651 | 0.003179 |

|      |          |          |
|------|----------|----------|
| 2643 | 0.000671 | 0.003159 |
| 2709 | 0.000683 | 0.003147 |
| 2774 | 0.000703 | 0.003127 |
| 2840 | 0.00072  | 0.00311  |
| 2906 | 0.00074  | 0.00309  |
| 2972 | 0.000755 | 0.003075 |
| 3038 | 0.000772 | 0.003058 |
| 3104 | 0.000788 | 0.003042 |
| 3170 | 0.000808 | 0.003022 |
| 3236 | 0.000825 | 0.003005 |
| 3302 | 0.000845 | 0.002985 |
| 3368 | 0.00086  | 0.00297  |
| 3434 | 0.000876 | 0.002954 |
| 3500 | 0.00089  | 0.00294  |
| 3565 | 0.000906 | 0.002924 |
| 3631 | 0.000927 | 0.002903 |
| 3697 | 0.000946 | 0.002884 |
| 3763 | 0.00096  | 0.00287  |
| 3829 | 0.000978 | 0.002852 |
| 3895 | 0.000992 | 0.002838 |
| 3961 | 0.001012 | 0.002818 |
| 4027 | 0.001028 | 0.002802 |
| 4092 | 0.001043 | 0.002787 |
| 4158 | 0.00106  | 0.00277  |
| 4224 | 0.001079 | 0.002751 |
| 4290 | 0.001088 | 0.002742 |
| 4356 | 0.001109 | 0.002721 |
| 4422 | 0.001122 | 0.002708 |
| 4488 | 0.00114  | 0.00269  |
| 4553 | 0.001154 | 0.002676 |
| 4619 | 0.001172 | 0.002658 |
| 4685 | 0.001183 | 0.002647 |

|      |          |          |
|------|----------|----------|
| 4751 | 0.001198 | 0.002632 |
| 4817 | 0.001215 | 0.002615 |
| 4882 | 0.001232 | 0.002598 |
| 4948 | 0.001248 | 0.002582 |
| 5014 | 0.001262 | 0.002568 |
| 5080 | 0.001273 | 0.002557 |
| 5146 | 0.001291 | 0.002539 |
| 5212 | 0.001307 | 0.002523 |
| 5278 | 0.001319 | 0.002511 |
| 5344 | 0.001333 | 0.002497 |
| 5410 | 0.001351 | 0.002479 |
| 5476 | 0.001366 | 0.002464 |
| 5542 | 0.001379 | 0.002451 |
| 5607 | 0.001395 | 0.002435 |
| 5673 | 0.001409 | 0.002421 |
| 5739 | 0.001422 | 0.002408 |
| 5805 | 0.001436 | 0.002394 |
| 5871 | 0.001454 | 0.002376 |
| 5937 | 0.001465 | 0.002365 |
| 6003 | 0.001476 | 0.002354 |
| 6069 | 0.001493 | 0.002337 |
| 6135 | 0.001507 | 0.002323 |
| 6201 | 0.00152  | 0.00231  |
| 6267 | 0.001532 | 0.002298 |
| 6332 | 0.001544 | 0.002286 |
| 6398 | 0.001561 | 0.002269 |
| 6464 | 0.001571 | 0.002259 |
| 6530 | 0.001586 | 0.002244 |
| 6596 | 0.001601 | 0.002229 |
| 6662 | 0.001612 | 0.002218 |
| 6728 | 0.001627 | 0.002203 |
| 6794 | 0.001639 | 0.002191 |

|      |          |          |
|------|----------|----------|
| 6860 | 0.001651 | 0.002179 |
| 6926 | 0.001662 | 0.002168 |
| 6992 | 0.001676 | 0.002154 |
| 7058 | 0.001691 | 0.002139 |
| 7124 | 0.001702 | 0.002128 |
| 7189 | 0.001716 | 0.002114 |
| 7255 | 0.001727 | 0.002103 |
| 7321 | 0.001739 | 0.002091 |
| 7387 | 0.00175  | 0.00208  |
| 7453 | 0.001766 | 0.002064 |
| 7519 | 0.001772 | 0.002058 |
| 7585 | 0.001788 | 0.002042 |
| 7651 | 0.001798 | 0.002032 |
| 7717 | 0.001812 | 0.002018 |
| 7783 | 0.001824 | 0.002006 |
| 7849 | 0.001834 | 0.001996 |
| 7915 | 0.001846 | 0.001984 |
| 7981 | 0.001859 | 0.001971 |
| 8046 | 0.001869 | 0.001961 |
| 8112 | 0.001883 | 0.001947 |
| 8178 | 0.001892 | 0.001938 |
| 8244 | 0.001905 | 0.001925 |
| 8310 | 0.001917 | 0.001913 |
| 8376 | 0.001925 | 0.001905 |
| 8442 | 0.001938 | 0.001892 |
| 8507 | 0.001948 | 0.001882 |
| 8573 | 0.001961 | 0.001869 |
| 8639 | 0.001972 | 0.001858 |
| 8705 | 0.001982 | 0.001848 |
| 8771 | 0.001994 | 0.001836 |
| 8837 | 0.002004 | 0.001826 |
| 8902 | 0.002013 | 0.001817 |

|              |          |          |
|--------------|----------|----------|
| <b>8968</b>  | 0.002026 | 0.001804 |
| <b>9034</b>  | 0.002035 | 0.001795 |
| <b>9100</b>  | 0.002043 | 0.001787 |
| <b>9166</b>  | 0.002055 | 0.001775 |
| <b>9232</b>  | 0.002068 | 0.001762 |
| <b>9298</b>  | 0.002076 | 0.001754 |
| <b>9364</b>  | 0.002087 | 0.001743 |
| <b>9430</b>  | 0.002095 | 0.001735 |
| <b>9496</b>  | 0.002107 | 0.001723 |
| <b>9562</b>  | 0.002117 | 0.001713 |
| <b>9628</b>  | 0.002126 | 0.001704 |
| <b>9694</b>  | 0.002137 | 0.001693 |
| <b>9760</b>  | 0.002146 | 0.001684 |
| <b>9826</b>  | 0.002158 | 0.001672 |
| <b>9892</b>  | 0.002167 | 0.001663 |
| <b>9958</b>  | 0.002176 | 0.001654 |
| <b>10024</b> | 0.002186 | 0.001644 |
| <b>10089</b> | 0.002191 | 0.001639 |
| <b>10155</b> | 0.002206 | 0.001624 |
| <b>10221</b> | 0.002212 | 0.001618 |
| <b>10287</b> | 0.002223 | 0.001607 |
| <b>10353</b> | 0.002237 | 0.001593 |
| <b>10419</b> | 0.002241 | 0.001589 |
| <b>10485</b> | 0.002249 | 0.001581 |
| <b>10551</b> | 0.00226  | 0.00157  |
| <b>10617</b> | 0.002266 | 0.001564 |
| <b>10683</b> | 0.002278 | 0.001552 |
| <b>10749</b> | 0.002285 | 0.001545 |
| <b>10815</b> | 0.002297 | 0.001533 |
| <b>10880</b> | 0.002303 | 0.001527 |
| <b>10946</b> | 0.002313 | 0.001517 |
| <b>11012</b> | 0.002321 | 0.001509 |
| <b>11078</b> | 0.002329 | 0.001501 |
| <b>11144</b> | 0.002335 | 0.001495 |
| <b>11210</b> | 0.002347 | 0.001483 |

|              |          |          |
|--------------|----------|----------|
| <b>11276</b> | 0.002353 | 0.001477 |
| <b>11342</b> | 0.002364 | 0.001466 |
| <b>11407</b> | 0.002373 | 0.001457 |
| <b>11473</b> | 0.002379 | 0.001451 |
| <b>11539</b> | 0.002387 | 0.001443 |
| <b>11605</b> | 0.002394 | 0.001436 |
| <b>11671</b> | 0.002406 | 0.001424 |
| <b>11737</b> | 0.002412 | 0.001418 |
| <b>11803</b> | 0.002422 | 0.001408 |
| <b>11869</b> | 0.00243  | 0.0014   |
| <b>11935</b> | 0.002435 | 0.001395 |
| <b>12001</b> | 0.002441 | 0.001389 |
| <b>12066</b> | 0.002453 | 0.001377 |
| <b>12133</b> | 0.002462 | 0.001368 |
| <b>12198</b> | 0.002468 | 0.001362 |
| <b>12264</b> | 0.002475 | 0.001355 |
| <b>12330</b> | 0.002483 | 0.001347 |
| <b>12396</b> | 0.00249  | 0.00134  |

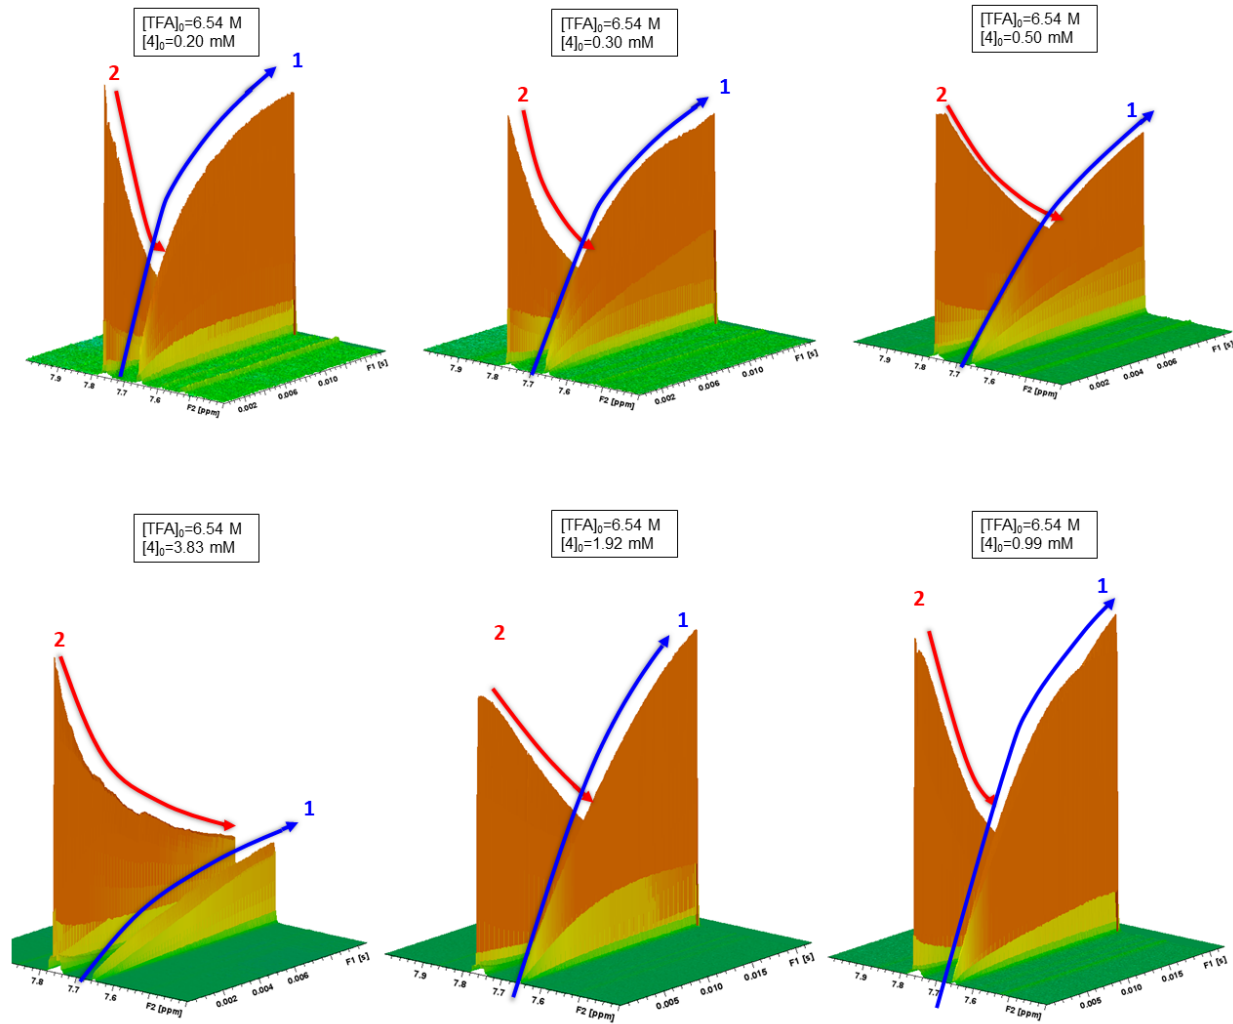

**Figure S28.** Using the intensity of aromatic  $H_C$  resonances in **2** and **1**, we monitored a change in the concentration of these two compounds (right) over time for six different reaction conditions (real time  $^1H$  NMR spectroscopy).





**Product inhibition:** Using the concentration/time data obtained in experiments with different starting concentrations of *tris*-aldehyde  $[2]_0 = 1, 0.5 \text{ mM}, 0.3 \text{ mM}, 0.25 \text{ mM}$  and the same concentration of TFA catalyst (6.54 M), the “time normalized plot” was constructed to evaluate if the product inhibition was taking place (Figure S29). That is to say, for each experiment we identified a point in time at which the aldehyde concentration dropped to 0.25 mM ( $[2] = 0.25 \text{ mM}$ ) followed by setting the time scale to, at this point, be 0. In this way, the concentration of starting *tris*-aldehyde **2** was in these four experiments set to be identical at the beginning of the conversion (Figure S29) while the amount of capsularene **1** different (Table S12). If there was no product inhibition, one would expect that four curves overlay. However, if the product inhibition was taking place, one would expect an increase in the rate reduction for reactions with larger quantity of **1**.

**Table S12.** Concentrations of capsularene **1** and *tris*-aldehyde **2** at normalized time 0 s in the four experiments used to evaluate the product inhibition.

| Concentration at actual time 0 s | Original data with actual times | Concentrations at normalized time 0 s |                                   |
|----------------------------------|---------------------------------|---------------------------------------|-----------------------------------|
| $[2]_{\text{tot}}, \text{mM}$    |                                 | $[2]_{\text{initial}}, \text{mM}$     | $[1]_{\text{initial}}, \text{mM}$ |
| 1.00                             | Table S9                        | 0.25                                  | 0.75                              |
| 0.50                             | Table S8                        | 0.25                                  | 0.25                              |
| 0.30                             | Table S7                        | 0.25                                  | 0.05                              |
| 0.25                             | Table S13                       | 0.25                                  | 0.00                              |

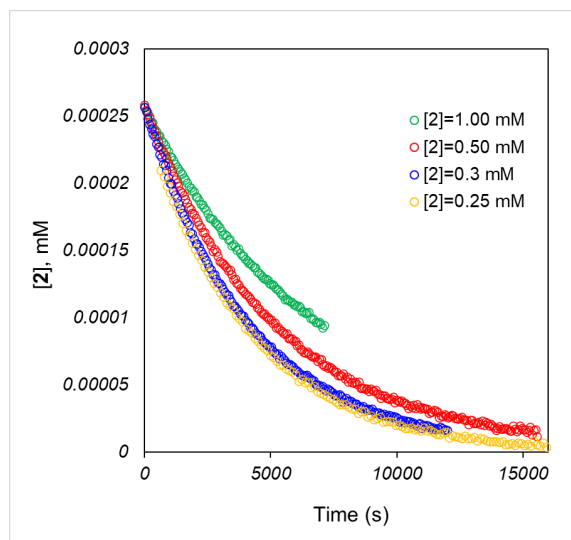

**Figure S29.** Four curves depicting the reaction progress for the conversion of 0.25 mM of **2** when increasingly greater amounts of capsularene **1** were present at the beginning. It is apparent that the reaction with the lowest starting concentration of capsularene **1** (yellow) proceeded at a higher rate than the one with the highest concentration of **1** (green).

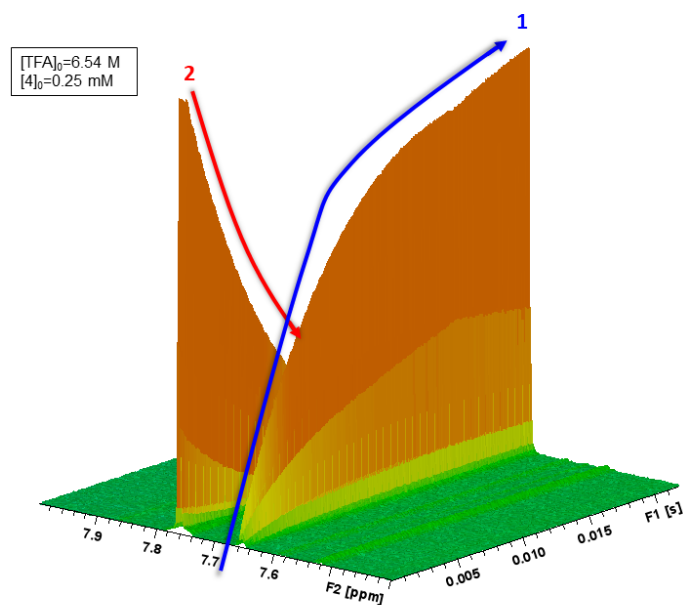

**Figure S30.** Real time  $^1\text{H}$  NMR experiments were used for evaluating the product inhibition with  $[\mathbf{2}]_0 = 0.25$  mM at the beginning of the reaction (no capsularene  $\mathbf{1}$  present); all other experiments used for this analysis are shown in Figure S28.

**Table S13.** Concentration of *tris*-aldehyde  $\mathbf{2}$  as a function of time in the experiment where  $[\mathbf{4}]_0 = 0.25$  mM and  $[\text{TFA}]_0 = 6.54$  M.

|             |                |             |          |             |          |             |          |
|-------------|----------------|-------------|----------|-------------|----------|-------------|----------|
| <b>t(s)</b> | <b>[2] (M)</b> | <b>2522</b> | 0.000134 | <b>4508</b> | 8.26E-05 | <b>6494</b> | 5.23E-05 |
| <b>660</b>  | 0.00021        | <b>2646</b> | 0.00013  | <b>4632</b> | 8E-05    | <b>6618</b> | 4.8E-05  |
| <b>784</b>  | 0.000205       | <b>2770</b> | 0.000126 | <b>4756</b> | 7.77E-05 | <b>6742</b> | 4.89E-05 |
| <b>908</b>  | 0.000198       | <b>2894</b> | 0.000123 | <b>4880</b> | 7.55E-05 | <b>6866</b> | 4.53E-05 |
| <b>1032</b> | 0.000193       | <b>3019</b> | 0.000119 | <b>5004</b> | 7.21E-05 | <b>6990</b> | 4.4E-05  |
| <b>1157</b> | 0.000187       | <b>3143</b> | 0.000115 | <b>5128</b> | 7.05E-05 | <b>7114</b> | 4.32E-05 |
| <b>1281</b> | 0.000183       | <b>3267</b> | 0.000111 | <b>5252</b> | 6.77E-05 | <b>7238</b> | 4.16E-05 |
| <b>1405</b> | 0.000177       | <b>3391</b> | 0.000109 | <b>5376</b> | 6.51E-05 | <b>7362</b> | 4.04E-05 |
| <b>1529</b> | 0.000171       | <b>3515</b> | 0.000107 | <b>5501</b> | 6.48E-05 | <b>7486</b> | 3.91E-05 |
| <b>1653</b> | 0.000165       | <b>3639</b> | 0.000102 | <b>5625</b> | 6.2E-05  | <b>7610</b> | 3.75E-05 |
| <b>1777</b> | 0.000161       | <b>3763</b> | 9.95E-05 | <b>5749</b> | 6.06E-05 | <b>7734</b> | 3.57E-05 |
| <b>1901</b> | 0.000156       | <b>3887</b> | 9.7E-05  | <b>5873</b> | 5.98E-05 | <b>7859</b> | 3.54E-05 |
| <b>2025</b> | 0.000151       | <b>4011</b> | 9.22E-05 | <b>5997</b> | 5.77E-05 | <b>7983</b> | 3.56E-05 |
| <b>2150</b> | 0.000147       | <b>4136</b> | 9.07E-05 | <b>6121</b> | 5.3E-05  | <b>8107</b> | 3.38E-05 |
| <b>2274</b> | 0.000143       | <b>4260</b> | 8.86E-05 | <b>6245</b> | 5.42E-05 | <b>8231</b> | 3.21E-05 |
| <b>2398</b> | 0.000138       | <b>4384</b> | 8.51E-05 | <b>6369</b> | 5.2E-05  | <b>8355</b> | 3.25E-05 |

|              |          |              |          |              |          |              |          |
|--------------|----------|--------------|----------|--------------|----------|--------------|----------|
| <b>8479</b>  | 2.89E-05 | <b>12699</b> | 1.23E-05 | <b>16920</b> | 4.43E-06 | <b>21140</b> | 1.78E-06 |
| <b>8603</b>  | 3.03E-05 | <b>12824</b> | 1.03E-05 | <b>17044</b> | 5.27E-06 | <b>21265</b> | 3.88E-07 |
| <b>8727</b>  | 3.02E-05 | <b>12948</b> | 1.04E-05 | <b>17169</b> | 5.25E-06 | <b>21389</b> | -8.3E-07 |
| <b>8852</b>  | 2.63E-05 | <b>13072</b> | 1.1E-05  | <b>17293</b> | 4.23E-06 | <b>21513</b> | -6.6E-07 |
| <b>8976</b>  | 2.73E-05 | <b>13196</b> | 8.44E-06 | <b>17417</b> | 2.9E-06  | <b>21637</b> | 1.59E-06 |
| <b>9100</b>  | 2.43E-05 | <b>13320</b> | 1.04E-05 | <b>17541</b> | 4.24E-06 | <b>21761</b> | 1.7E-06  |
| <b>9224</b>  | 2.52E-05 | <b>13444</b> | 9.67E-06 | <b>17665</b> | 1.99E-06 | <b>21885</b> | 8.94E-07 |
| <b>9348</b>  | 2.6E-05  | <b>13568</b> | 8.65E-06 | <b>17789</b> | 2.51E-06 | <b>22009</b> | -9.6E-07 |
| <b>9472</b>  | 2.27E-05 | <b>13693</b> | 7.82E-06 | <b>17913</b> | 2.07E-06 | <b>22133</b> | 2.66E-06 |
| <b>9596</b>  | 2.29E-05 | <b>13817</b> | 7.98E-06 | <b>18037</b> | 2.9E-06  | <b>22257</b> | 2.03E-06 |
| <b>9721</b>  | 2.3E-05  | <b>13941</b> | 8.09E-06 | <b>18161</b> | 4.02E-06 | <b>22381</b> | -7.7E-07 |
| <b>9845</b>  | 2.23E-05 | <b>14065</b> | 7.64E-06 | <b>18286</b> | 1.38E-06 | <b>22506</b> | 1.38E-06 |
| <b>9969</b>  | 2.01E-05 | <b>14189</b> | 8.13E-06 | <b>18410</b> | 1.74E-06 | <b>22630</b> | 5.6E-07  |
| <b>10093</b> | 2.03E-05 | <b>14313</b> | 5.65E-06 | <b>18534</b> | 3.78E-06 | <b>22754</b> | 1.23E-06 |
| <b>10217</b> | 1.94E-05 | <b>14438</b> | 5.92E-06 | <b>18658</b> | 2.31E-06 | <b>22878</b> | 1.03E-06 |
| <b>10341</b> | 1.79E-05 | <b>14562</b> | 6.51E-06 | <b>18782</b> | 2.88E-06 | <b>23002</b> | -1E-06   |
| <b>10465</b> | 1.77E-05 | <b>14686</b> | 4.99E-06 | <b>18906</b> | 3.51E-06 | <b>23126</b> | 8.79E-07 |
| <b>10590</b> | 1.8E-05  | <b>14810</b> | 6.82E-06 | <b>19030</b> | 2.48E-06 | <b>23250</b> | 3.91E-07 |
| <b>10714</b> | 1.69E-05 | <b>14934</b> | 6.64E-06 | <b>19154</b> | 1.34E-06 | <b>23374</b> | 1.06E-06 |
| <b>10838</b> | 1.72E-05 | <b>15058</b> | 5.16E-06 | <b>19278</b> | 1.88E-06 | <b>23498</b> | -2.2E-06 |
| <b>10962</b> | 1.58E-05 | <b>15182</b> | 6.06E-06 | <b>19402</b> | 3.08E-06 | <b>23622</b> | 8.57E-07 |
| <b>11086</b> | 1.81E-05 | <b>15307</b> | 4.64E-06 | <b>19527</b> | 1.69E-06 | <b>23747</b> | 1.69E-06 |
| <b>11210</b> | 1.59E-05 | <b>15431</b> | 8.52E-06 | <b>19651</b> | 9.56E-07 | <b>23871</b> | 1.83E-06 |
| <b>11334</b> | 1.62E-05 | <b>15555</b> | 5.56E-06 | <b>19775</b> | 5.56E-07 | <b>23995</b> | -5.6E-07 |
| <b>11458</b> | 1.49E-05 | <b>15679</b> | 4.56E-06 | <b>19899</b> | -5.5E-07 | <b>24119</b> | -2.2E-07 |
| <b>11582</b> | 1.37E-05 | <b>15803</b> | 7.08E-06 | <b>20023</b> | 2.61E-06 | <b>24243</b> | 1.21E-06 |
| <b>11707</b> | 1.29E-05 | <b>15928</b> | 3.88E-06 | <b>20147</b> | 2.2E-06  | <b>24367</b> | -9.1E-07 |
| <b>11831</b> | 1.44E-05 | <b>16052</b> | 3.94E-06 | <b>20272</b> | -4.9E-07 | <b>24491</b> | -1.9E-06 |
| <b>11955</b> | 1.49E-05 | <b>16176</b> | 3.63E-06 | <b>20396</b> | 2.25E-06 | <b>24615</b> | 6.17E-07 |
| <b>12079</b> | 1.06E-05 | <b>16300</b> | 4.07E-06 | <b>20520</b> | 1.5E-06  | <b>24739</b> | -8E-07   |
| <b>12203</b> | 1.24E-05 | <b>16424</b> | 4.52E-06 | <b>20644</b> | -5.1E-07 | <b>24864</b> | -7.9E-07 |
| <b>12327</b> | 1.18E-05 | <b>16548</b> | 5.37E-06 | <b>20768</b> | 1.66E-06 | <b>24988</b> | -1.3E-06 |
| <b>12451</b> | 1.12E-05 | <b>16672</b> | 3.18E-06 | <b>20892</b> | 2.4E-06  | <b>25112</b> | 2.24E-06 |
| <b>12575</b> | 1.04E-05 | <b>16796</b> | 3.9E-06  | <b>21016</b> | 8.2E-07  | <b>25236</b> | -1.3E-07 |

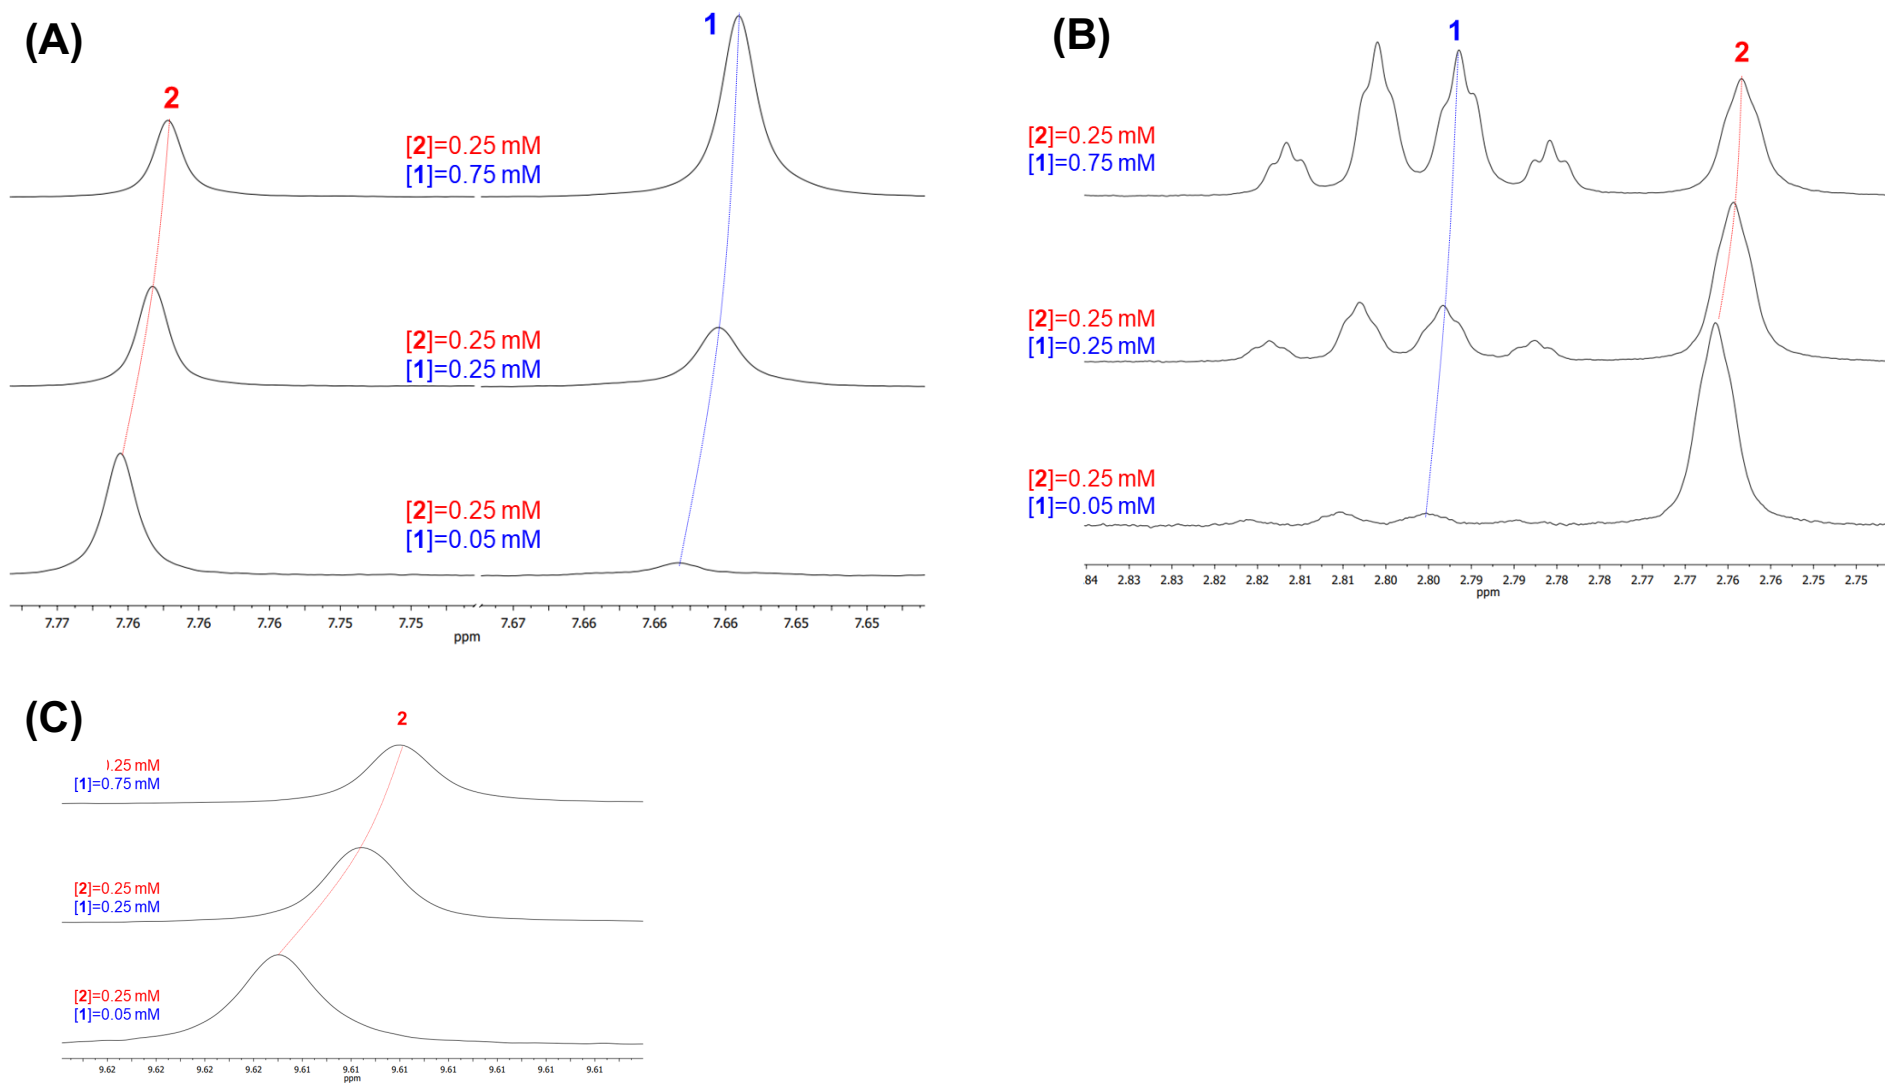

**Figure S31.** Partial  $^1\text{H}$  NMR spectra measured at  $[\mathbf{2}] = 0.25$  mM,  $[\text{TFA}] = 6.54$  M and  $[\mathbf{1}] = 0.05$  to 0.75 mM. Observed upfield shifts of (A)  $\text{H}_\text{C}$ , (B)  $\text{H}_\text{E}$  and (C) CHO resonances from **2** and **1** were, we posit, caused by noncovalent interaction of capsularene **1** and *tris*-aldehyde **2** ( $\mathbf{1} + \mathbf{2} \leftrightarrow \mathbf{1}\subset\mathbf{2}$ ).

**Fitting procedure (Figure 4C in the main text):** Concentrations of tris-aldehyde basket **2** (substrate, S) were determined as a function of time by NMR integration for reactions with initial total concentrations of 0.25, 0.3, 0.5 and 1.0 mM of *tris*-acetal basket **4**. For each series, results with the concentration of **2** (S) starting at 0.25 mM were extracted in order to obtain comparable time series with distinct concentrations of capsularene **1** (product, P) These data were then fitted directly in Julia 1.7 (<https://epubs.siam.org/doi/10.1137/141000671>) using DifferentialEquations.jl (Rackauckas, Christopher and Nie, Qing, A Performant and Feature-Rich Ecosystem for Solving Differential Equations in Julia, The Journal of Open Research Software, doi = 10.5334/jors.151) to a kinetic model with first order reaction rate  $k$ , and product inhibition, i.e. rapidly reversible formation of the complex [**1**⊂**2**] with dissociation constant  $K_d$ .

$$\frac{d[S]}{dt} = -k[S]_{\text{free}}$$

$$[S]_{\text{free}} = \frac{[S]_0 - [P]_0 - K_d + \sqrt{([S]_0 + [P]_0 + K_d)^2 - 4[S]_0[P]_0}}{2}$$

## Solvent Effect

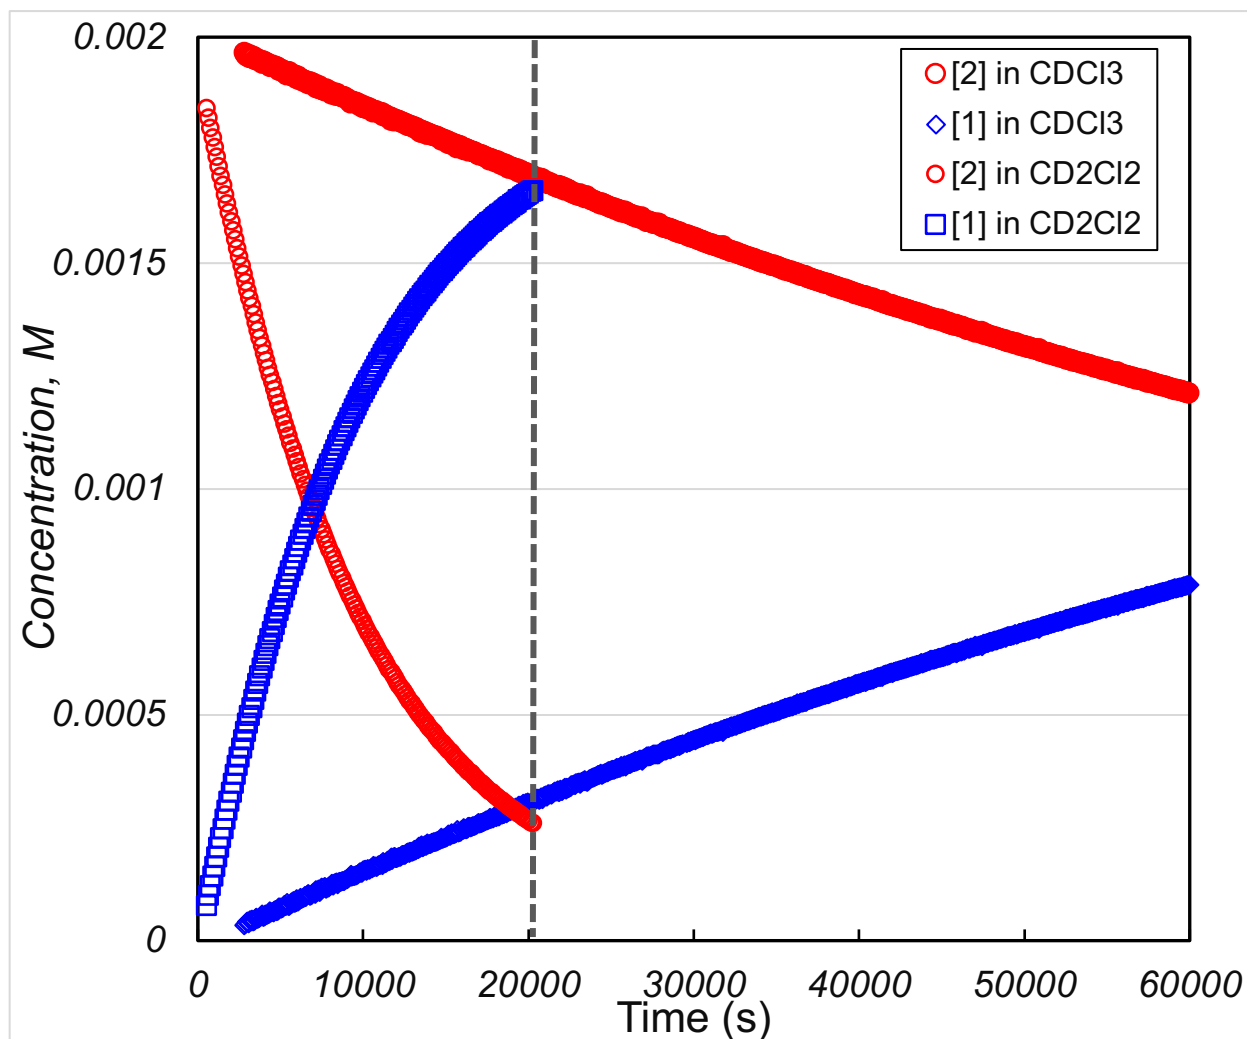

**Figure S32.** A plot showing the reaction progress for the formation of capsularene **1** and disappearance of *tris*-aldehyde **2** in CD<sub>2</sub>Cl<sub>2</sub> and CDCl<sub>3</sub>; note that for both reactions, [2]<sub>0</sub> = 2.00 mM and [TFA]<sub>0</sub> = 3.27 M. For convenience, we compared the ratio  $R=[2]/[1]$  at  $t=20.000$  s and find that  $R(\text{CD}_2\text{Cl}_2)=0.18$  while  $R(\text{CDCl}_3)=5.66$ . Apparently, the reaction was much slower in CDCl<sub>3</sub> than CD<sub>2</sub>Cl<sub>2</sub>.

## Electrochemical Measurements

**Bulk Electrolysis:** Bulk electrolysis experiments were carried out with a BioLogic VSP galvanostat in a custom glass H-cell and reticulated vitreous carbon electrodes (100  $\mu\text{m}$ ). A porous glass frit (P5, Adams and Chittenden) was used as the separator. A quasi-reference electrode (BASi) with 0.01 M  $\text{AgBF}_4$  (Millipore Sigma) in 0.02 M recrystallized  $\text{TBAPF}_6$  in MeCN was used on the working side of the H-cell. The electrolyte solution in the working chamber of the H-cell contained the corresponding sample and 0.02 M recrystallized  $\text{TBAPF}_6$  in MeCN. The counter electrolyte contained the same solution. The working chamber of the H-cell was loaded with 5.5 mL of the electrolyte solution and stirred continuously during cycling at a rate of 0.5 mA with a voltaic cutoff. The counter chamber of the H-cell was also loaded with 5.5 mL of the electrolyte solution.

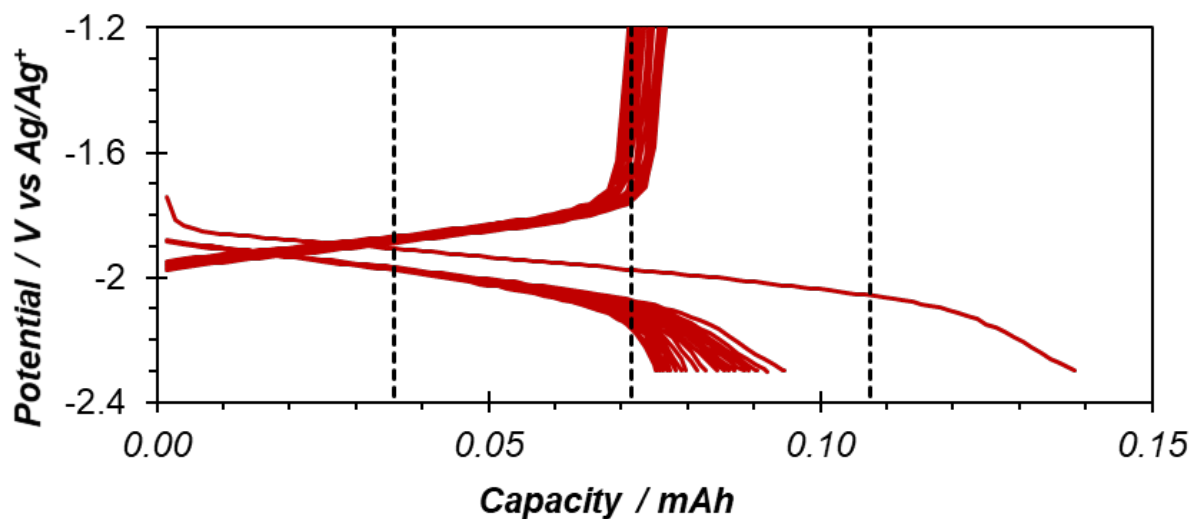

**Figure S33.** A plot showing bulk electrolysis data for *tris*-acetal basket **4** (0.243 mM). The cell was cycled at 0.5 mA in 0.02 M  $\text{TBAPF}_6$  acetonitrile solution. Dashed lines show theoretical capacities for one-electron processes. The experimental data are in line with a 3-electron process, although a complete 3-electron reduction was limited by low solubility of **4**.

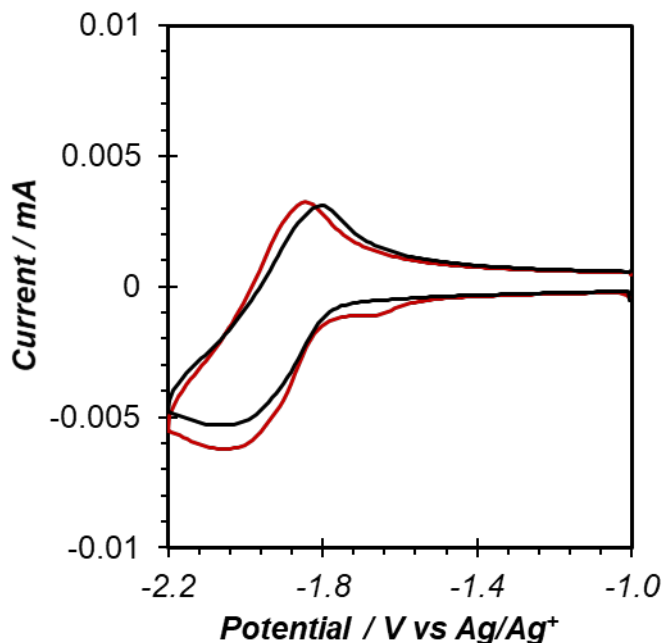

**Figure 34.** Cyclic voltammograms recorded before (red trace) and after (black trace) bulk electrolysis of *tris*-acetal basket **4** (0.243 mM). The cell was cycled at 0.5 mA in 0.02 M TBAPF<sub>6</sub> acetonitrile solution. No significant attenuation of the signal was observed after bulk electrolysis, which suggests that **4** is stable to bulk electrolysis.

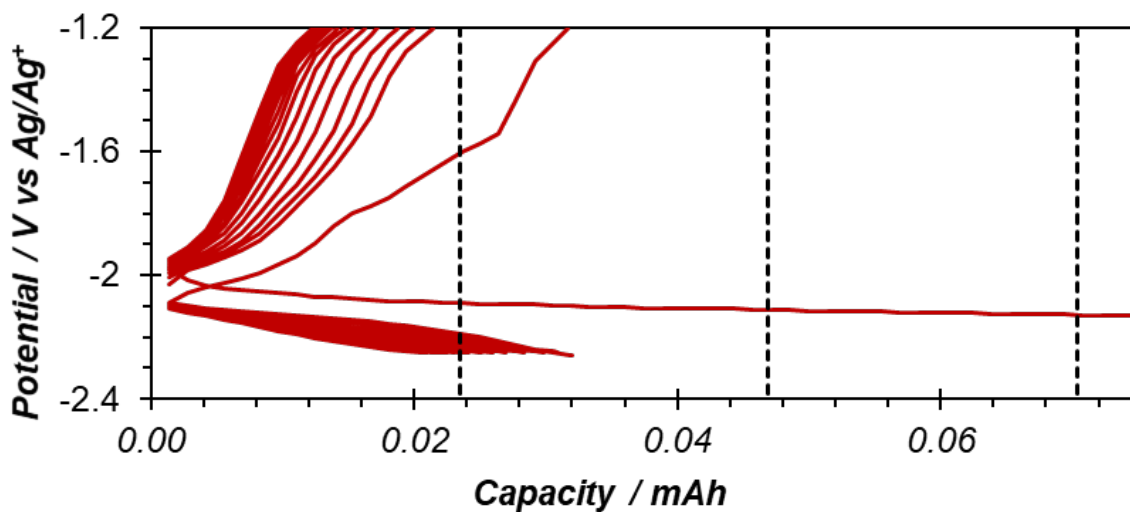

**Figure 35.** A plot showing bulk electrolysis data for capsularene **1** (0.175 mM). The cell was cycled at 0.5 mA in 0.02 M TBAPF<sub>6</sub> acetonitrile solution. Dashed lines show theoretical capacities for 1-electron processes. Capacity decay was observed with each cycle which suggests degradation of **1** during bulk electrolysis.



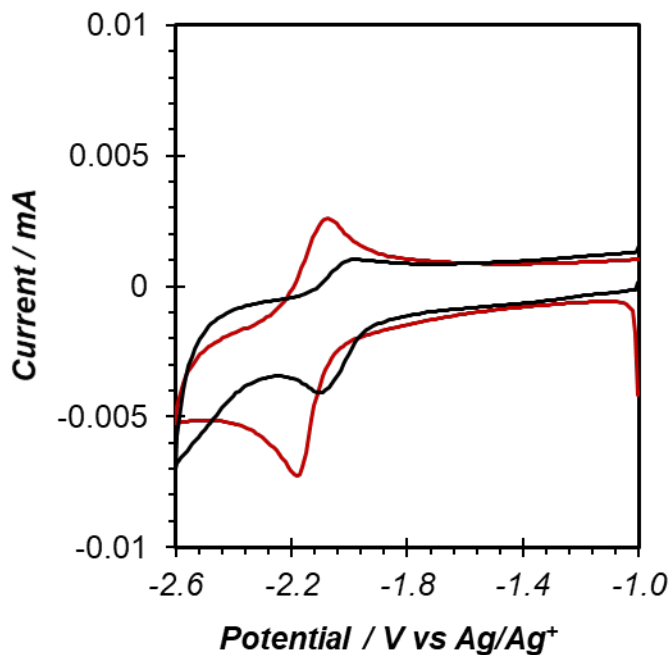

**Figure 36.** Cyclic voltammograms of 0.175 mM solution of capsularene **1** in acetonitrile, recorded before (red trace) and after bulk electrolysis (black trace). The cell was cycled at 0.5 mA in 0.02 M TBAPF<sub>6</sub> acetonitrile. Attenuation of the black trace suggests decay of **1** during bulk electrolysis.

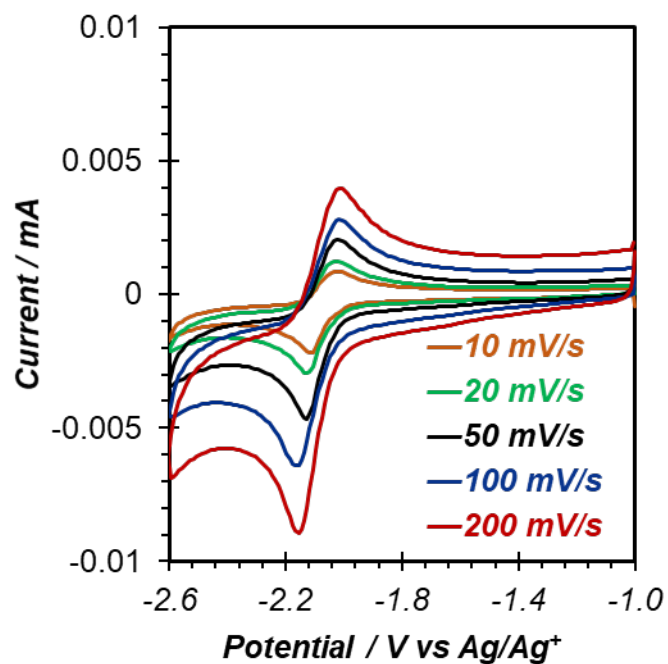

**Figure 37.** Cyclic voltammograms of *tris*-acetal basket **4** (0.175 mM) in 0.02 M TBAPF<sub>6</sub> acetonitrile solution obtained by varying the scan rate.

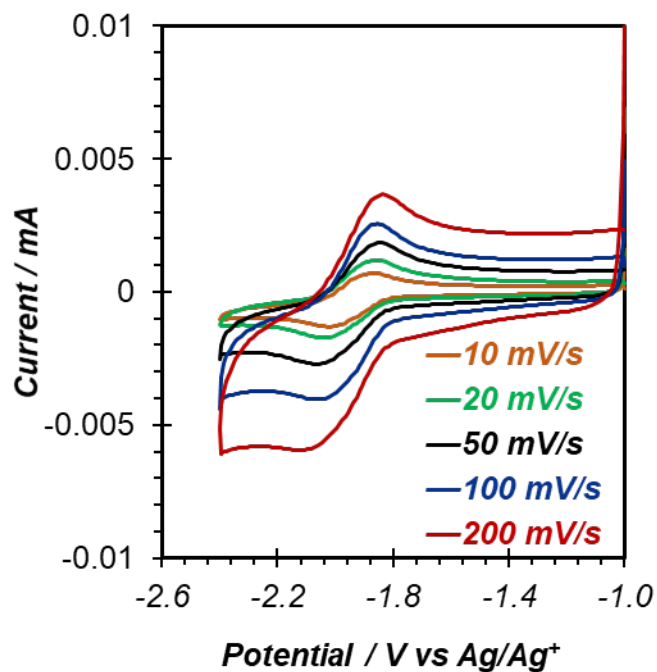

**Figure 38.** Cyclic voltammograms of capsularene **1** (0.175 mM) in 0.02 M TBAPF<sub>6</sub> in acetonitrile obtained by varying scan rates.

# Thermal Gravimetric Analysis (TGA)

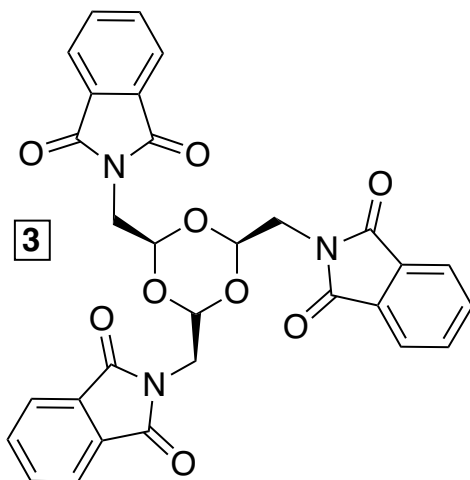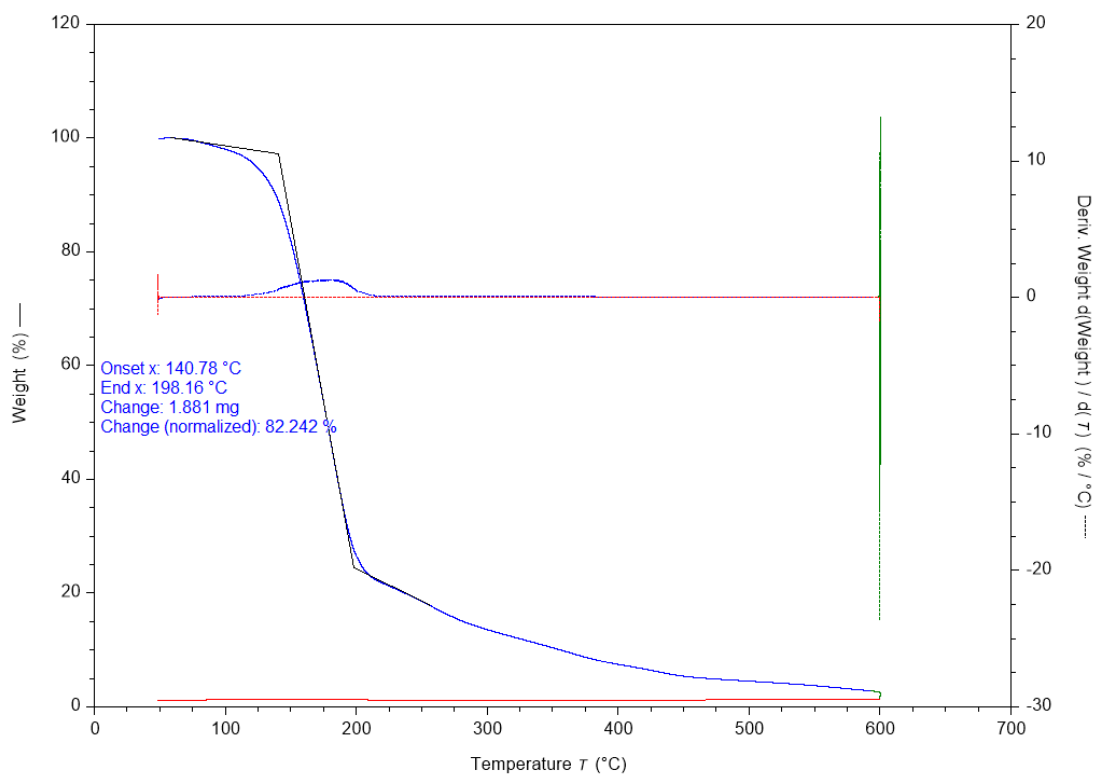

**Figure S39.** TGA plot obtained from 2.30 mg of compound **3**.

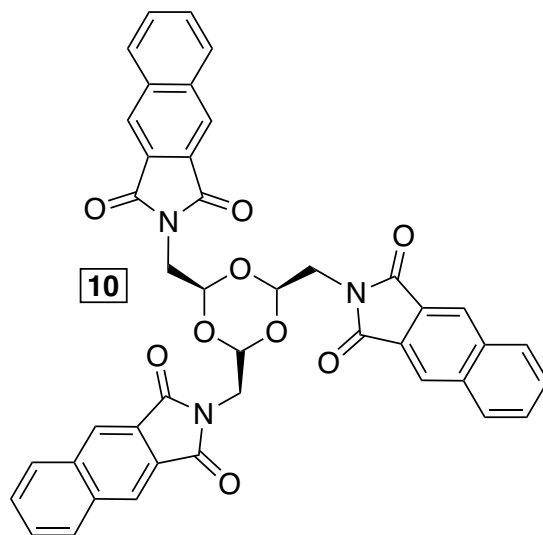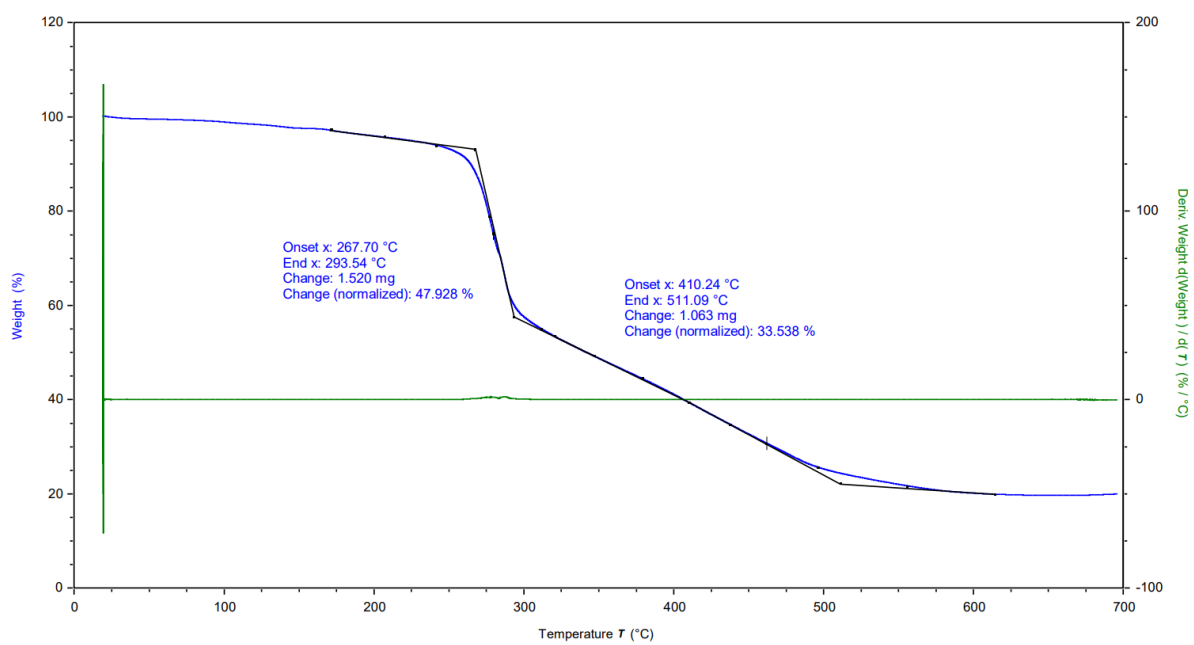

**Figure S40.** TGA plot obtained from 1.85 mg of compound **10**.

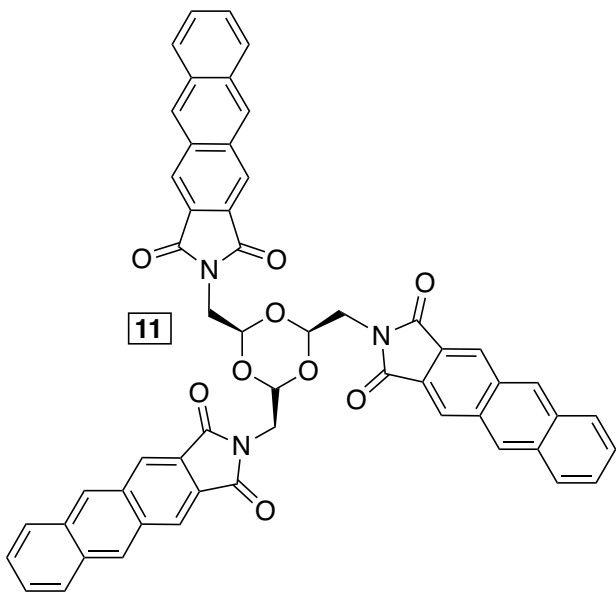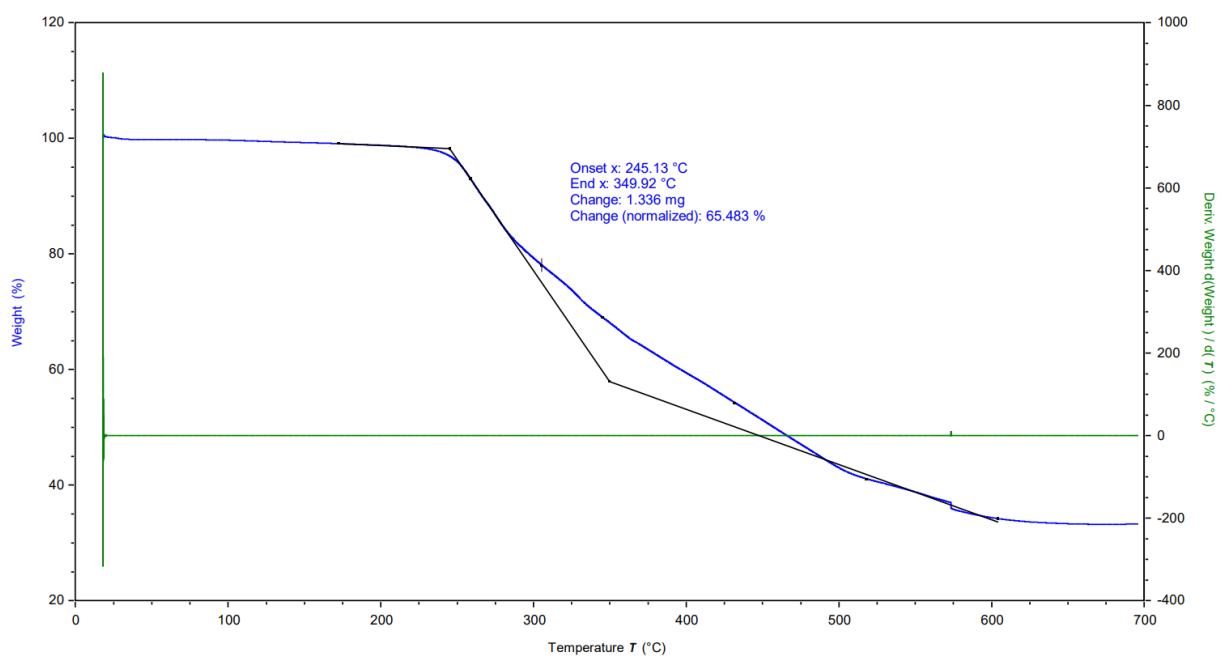

**Figure S41.** TGA plot obtained from 2.04 mg of compound **11**.

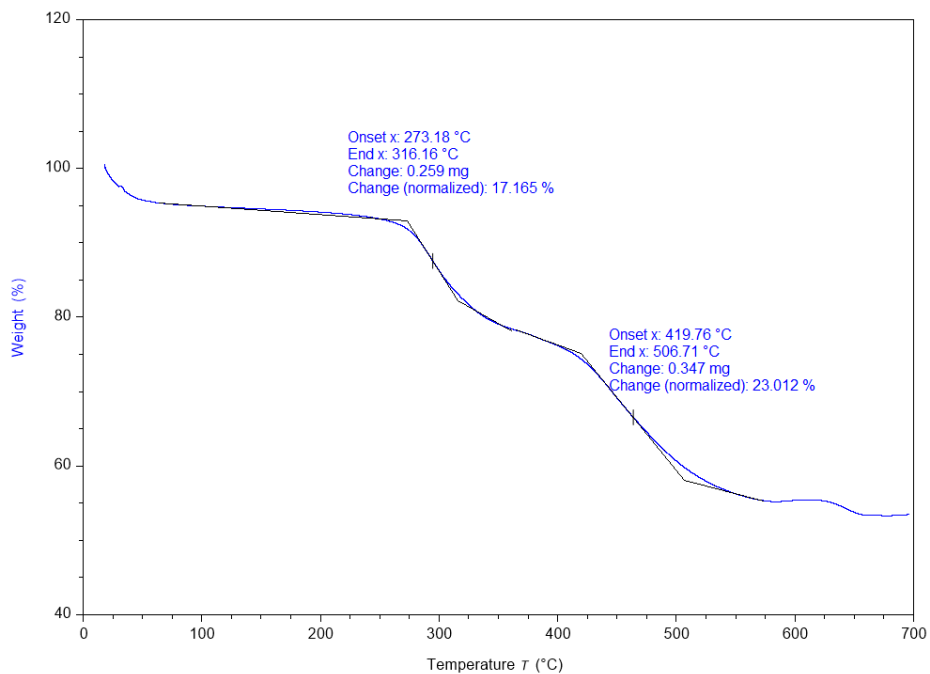

**Figure S42.** TGA plot obtained from 1.51 mg of capsularene **1**.

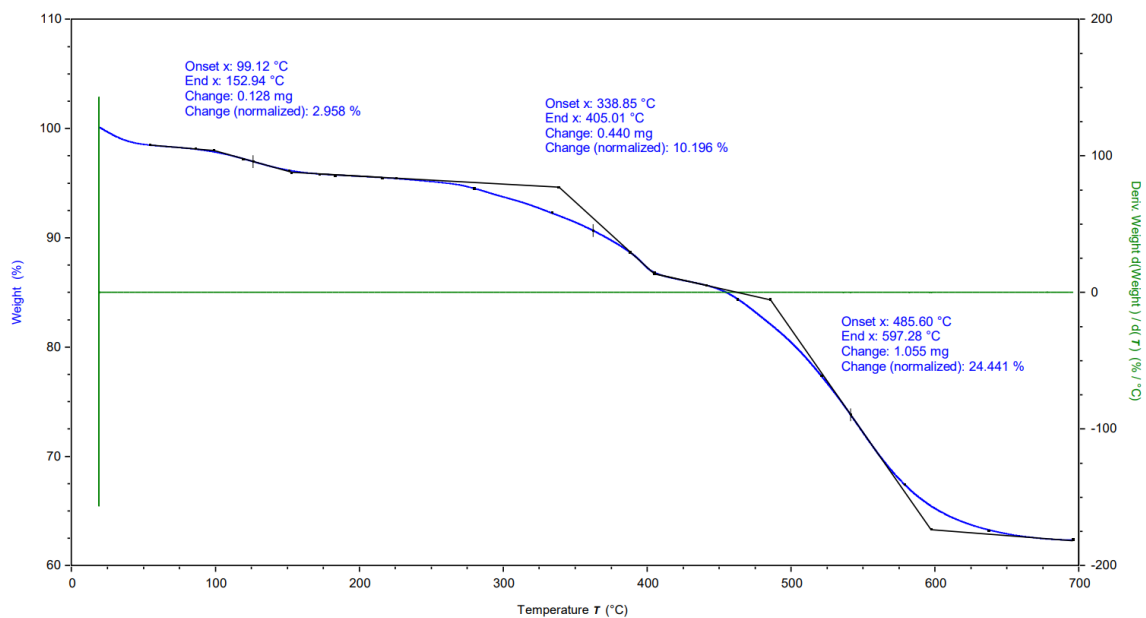

**Figure S43.** TGA plot obtained from 4.32 mg of capsularene **8**.

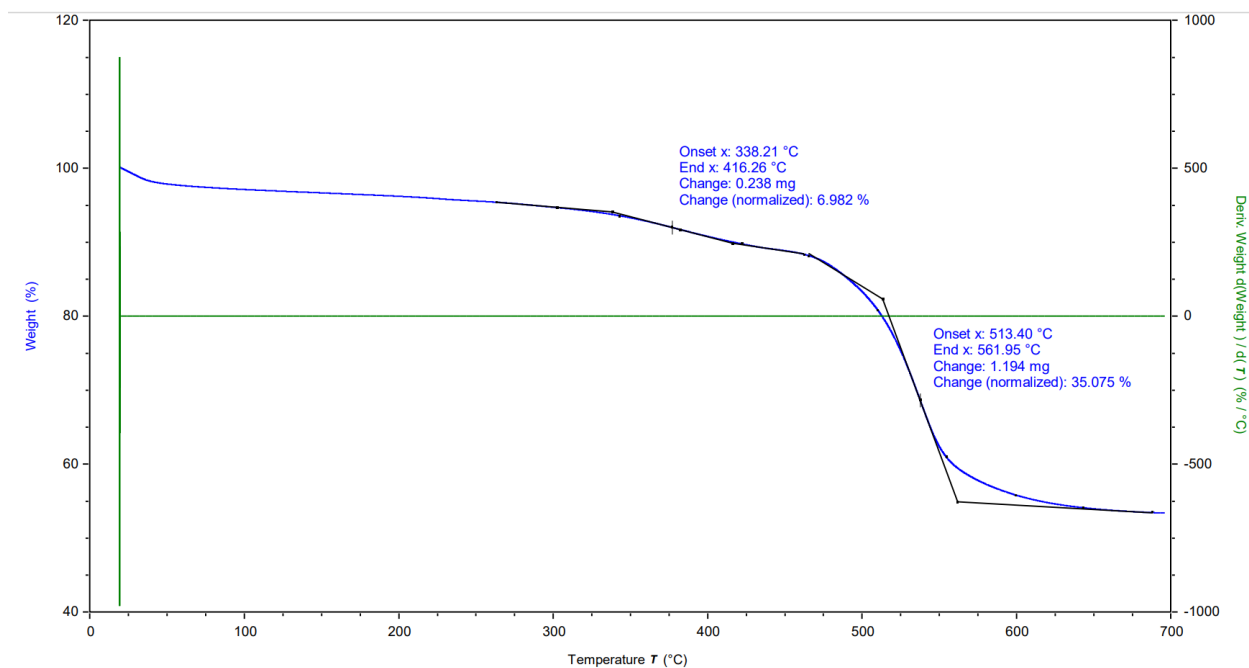

**Figure S44.** TGA plot obtained from 3.40 mg of capsularene **9**.

# Computational Studies

**Thermochemical Calculations with Capsularenes and Model Compounds:** To inspect the thermodynamics of trioxane ring formation, density functional theory (DFT) calculations were carried out using Gaussian 16.<sup>1</sup> The specific reactions inspected are shown below (Figure S45).

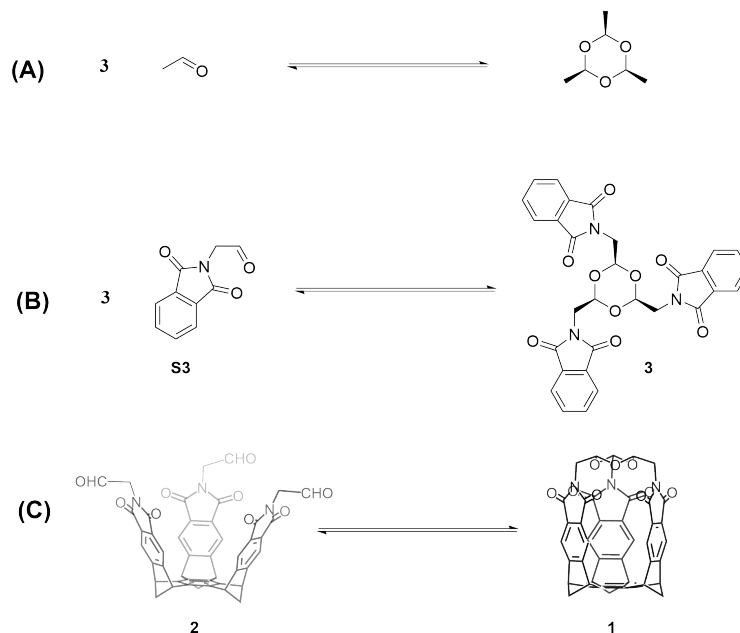

**Figure S45.** Thermodynamics of three chemical transformations (A), (B) and (C) were studied using DFT.

To complete thermochemistry calculations, the following steps were taken. First, for 2-(2,2-dimethoxyethyl)isoindoline-1,3-dione, compound **3**, and *tris*-aldehyde **2**, a conformational search was completed in MacroModel.<sup>2</sup> Next, the optimization of the 10 lowest energy conformers (or fewer, if fewer were found in the search) was carried out at the B3LYP/6-31+G\* level of theory<sup>3</sup> with the SMD<sup>4</sup> dichloromethane solvation model. A frequency calculation was carried out to compare thermodynamic stabilities and ensure that geometries were stable minima on the potential energy surface (PES). The thermodynamic quantities were then retrieved at 298 K, and the reaction free energies, enthalpies and entropies were compared. A table summarizing the values found for the free energy ( $G$ ) and the enthalpy ( $H$ ) for all conformers inspected is given below (Table S14). Then, a table summarizing the reactions' enthalpies and free energies is given (Table S15). Last, the coordinates of the lowest energy conformer of each molecule are given at the end of the computational section of the SI.



**Table S14.** Computed thermodynamic parameters (298 K) for conformers of reactants and products in Figure S45.

| Reaction         | Molecule     | Conformer | Enthalpy (Hartree) | Free Energy (Hartree) |
|------------------|--------------|-----------|--------------------|-----------------------|
| Figure S45 – (A) | Acetaldehyde | 1         | -153.778533        | -153.807094           |
|                  | Trioxane     | 1         | -461.363856        | -461.407542           |
| Figure S45 – (B) | Aldehyde     | 1         | -665.603172        | -665.654776           |
|                  | Aldehyde     | 2         | -665.60314         | -665.654379           |
|                  | Aldehyde     | 3         | -665.604515        | -665.655101           |
|                  | Aldehyde     | 4         | -665.603105        | -665.654436           |
|                  | Trioxane 3   | 1         | N/A                | N/A                   |
|                  | Trioxane 3   | 2         | -1996.822719       | -1996.924989          |
|                  | Trioxane 3   | 3         | -1996.826213       | -1996.93273           |
|                  | Trioxane 3   | 4         | N/A                | N/A                   |
|                  | Trioxane 3   | 5         | -1996.826256       | -1996.930192          |
|                  | Trioxane 3   | 6         | -1996.825226       | -1996.927997          |
|                  | Trioxane 3   | 7         | -1996.825219       | -1996.927735          |
|                  | Trioxane 3   | 8         | -1996.822047       | -1996.924127          |
|                  | Trioxane 3   | 9         | -1996.827647       | -1996.933128          |
|                  | Trioxane 3   | 10        | -1996.818571       | -1996.91936           |
| Figure S45 – (C) | Aldehyde 2   | 1         | -2571.846089       | -2571.973259          |
|                  | Aldehyde 2   | 2         | -2571.845989       | -2571.972815          |
|                  | Aldehyde 2   | 3         | -2571.84504        | -2571.972025          |
|                  | Aldehyde 2   | 4         | -2571.843284       | -2571.970203          |
|                  | Aldehyde 2   | 5         | -2571.844618       | -2571.971966          |
|                  | Aldehyde 2   | 6         | -2571.844464       | -2571.971379          |
|                  | Aldehyde 2   | 7         | -2571.844447       | -2571.971753          |
|                  | Aldehyde 2   | 8         | N/A                | N/A                   |
|                  | Aldehyde 2   | 9         | -2571.844531       | -2571.97139           |
|                  | Aldehyde 2   | 10        | -2571.841403       | -2571.968588          |
|                  | Trioxane 1   | 1         | -2571.838525       | -2571.941255          |

\*For entries marked N/A the calculation did not finish in the allocated wall time.

**Table S15.** The Boltzmann weighted thermodynamic parameters (298 K) for three reactions shown in Figure S45.

| Reaction         | Reaction Enthalpy $\Delta H^\circ$ (kcal/mol) | Reaction Free Energy $\Delta G^\circ$ (kcal/mol) |
|------------------|-----------------------------------------------|--------------------------------------------------|
| Figure S45 – (A) | -17.7312675                                   | 8.62185                                          |
| Figure S45 – (B) | -8.849005                                     | 20.1898125                                       |
| Figure S45 – (C) | 4.74641                                       | 20.08251                                         |

**Calculation of Strain Energy for 1:** The strain energy of **1** was computed by considering two transformations below (A and B, Figure S46) comprising an isodesmic (B-minus-A) reaction. The enthalpy of the bonds forming in the absence of the bicyclic base (**S3** to **3**,  $\Delta H_A$ ) was subtracted from the energy of the bond forming reaction in the presence of the bicyclic base (**2** to **1**,  $\Delta H_B$ ). This  $\Delta H_B - \Delta H_A$  was then taken as the strain energy (Table S16).

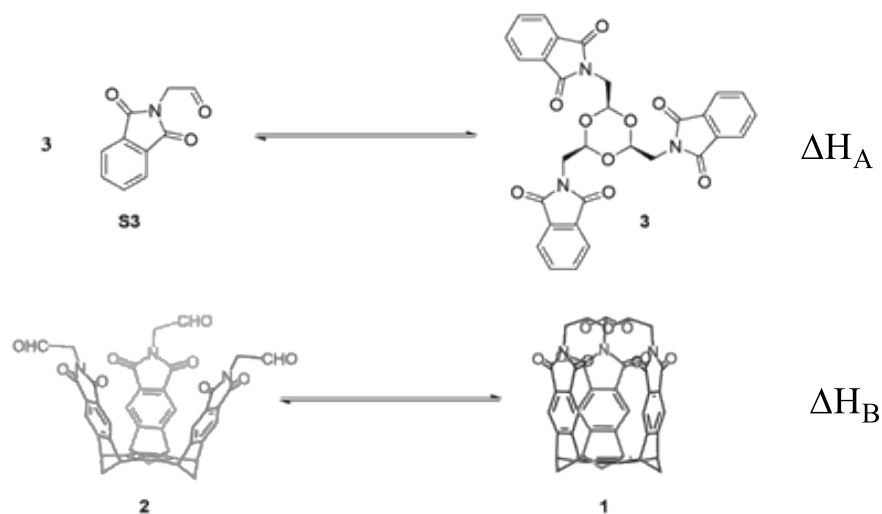

**Figure S46.** Chemical transformations (A) and (B) were used to compute the strain of capsularene **1**.

**Table S16.** The Boltzmann weighted thermodynamic parameters (298 K) for strain calculation represented in figure S46.

| Reaction                      | Reaction Enthalpy $\Delta H^\circ$ (kcal/mol) |
|-------------------------------|-----------------------------------------------|
| Figure S46 – ( $\Delta H_A$ ) | -8.849                                        |
| Figure S46 – ( $\Delta H_B$ ) | 4.746                                         |
| Strain Energy                 | 13.595                                        |

**Calculation of UV-vis spectra with time dependent DFT (TD-DFT):** In addition to reaction thermodynamics, the optical characteristics of capsularenes **1**, **8**, and **9** were studied using the TD-DFT method described in previous publications.<sup>5,6</sup> In brief, capsularenes were first optimized at the B3LYP/6-31+G\* level of theory with SMD dichloromethane solvation and frequency calculations were run to ensure the structures were minima on the PES. These optimized structures were then put through a TD-DFT calculation at the CAM-B3LYP<sup>7</sup>/def2svp level of theory. Since the def2svp basis set is not implemented in Gaussian 16, the basis set was obtained from the basis set exchange website.<sup>8</sup> For **1** and **8**, the calculation of 20 states was sufficient to reproduce the observed UV transitions. For **9**, 30 states were calculated to reproduce the experimentally observed UV-Vis transitions. The calculated UV-Vis spectra were in Figures S46-S48 plotted against the experimental data.

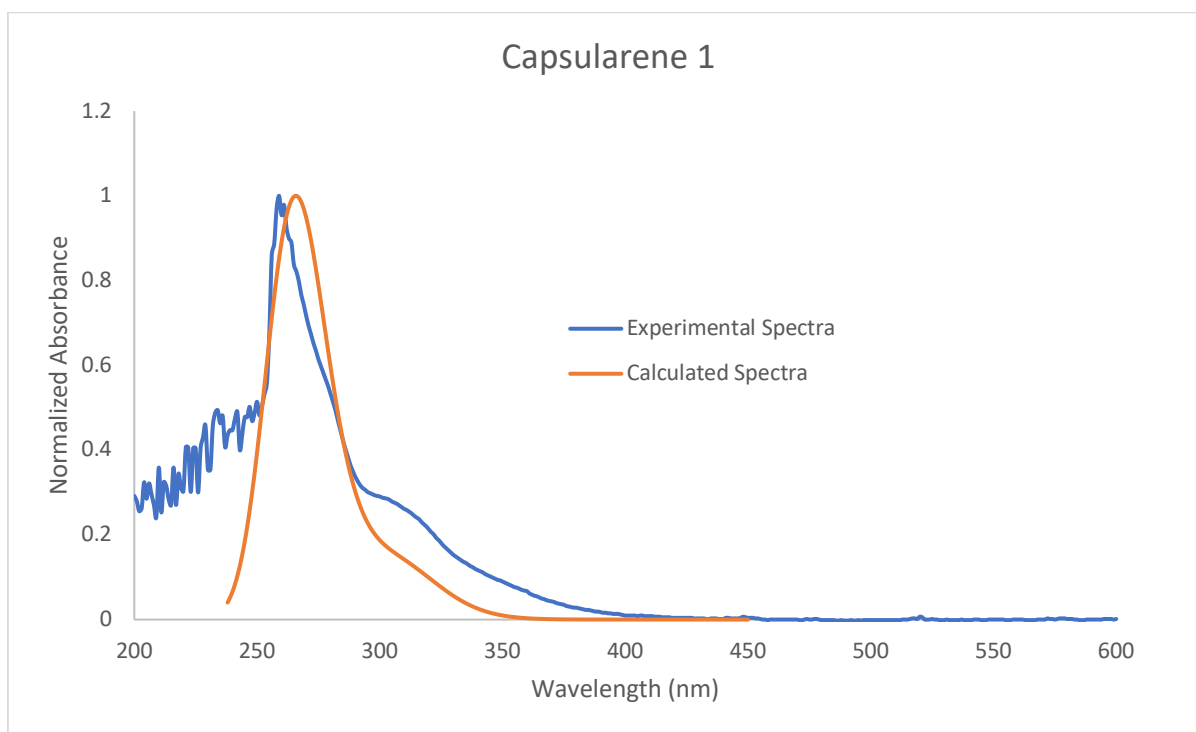

**Figure S47.** Computed (red) and experimental (blue) UV-vis spectra of capsularene **1**. GaussView 6.0 was used to apply gaussian line broadening of the computed transitions, with no shift applied to the spectrum.

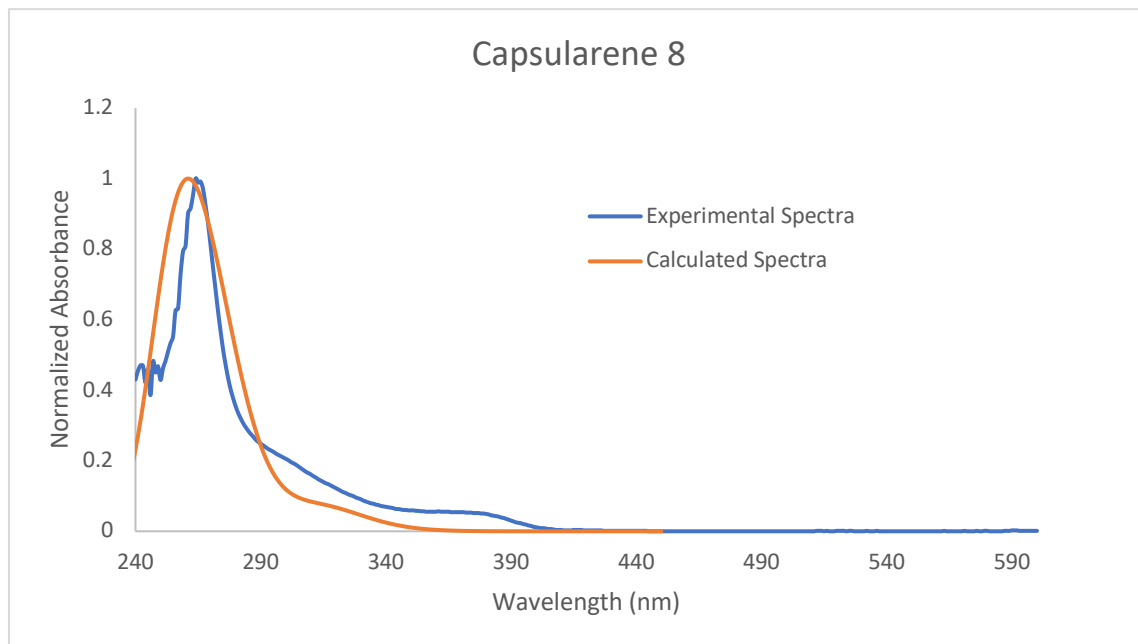

**Figure S48.** Computed (red) and experimental (blue) UV-vis spectra for capsularene **8**. GaussView 6.0 was used to apply gaussian line broadening of the computed transitions, with no shift applied to the spectrum.

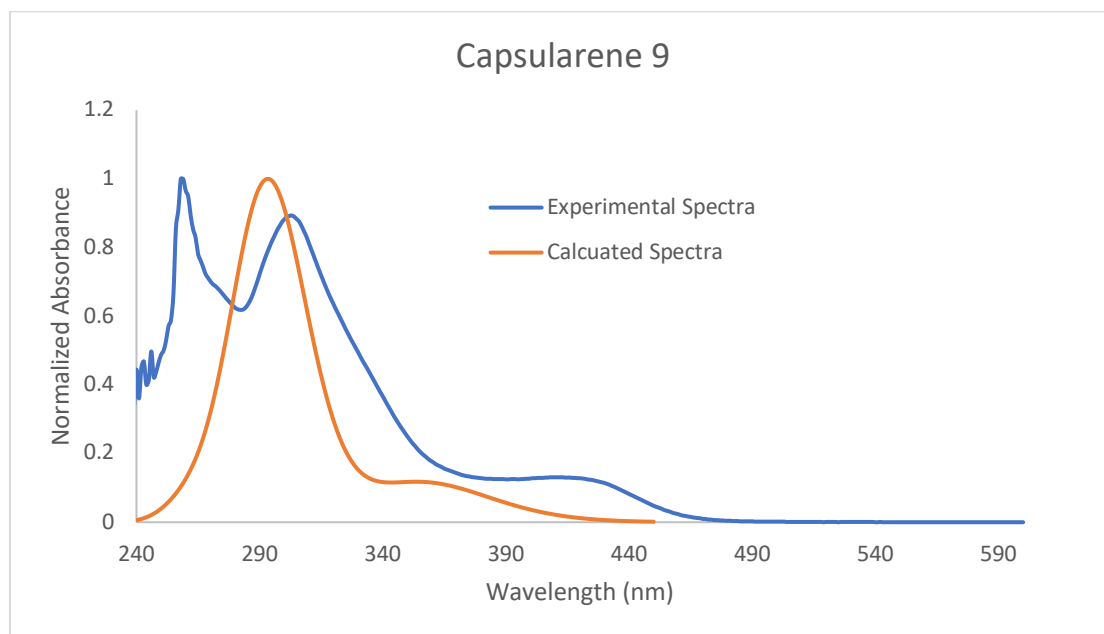

**Figure S49.** Computed (red) and experimental (blue) UV-vis spectra for capsularene **8**. GaussView 6.0 was used to apply gaussian line broadening of the computed transitions, with no shift applied to the spectrum.

**Orbital analysis of electronic transitions:** Following the calculation of UV-vis spectra via a TD-DFT methodology, a natural transition orbital (NTO) calculation was carried out at the same level of theory to inspect the type of orbital transition giving rise to the lowest energy UV-vis band. Visualizations of these lowest energy NTOs are given below (Figures S49-S51). Note that only one NTO is shown to identify the type of transition and that other NTOs, which are comprised of linear combinations of very similar orbitals localized on the independent arms, are not shown here.

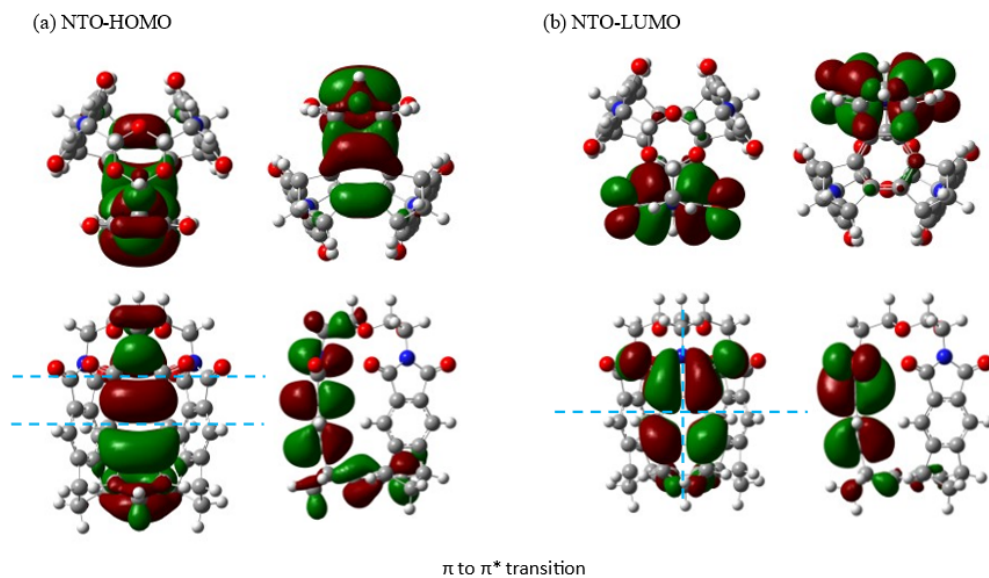

**Figure S50.** NTOs for the lowest energy electronic transition of **1**. (a) HOMO orbital for the first transition. (b) LUMO orbital for the first transition. To visualize the orbitals, we used GaussView 6.0.

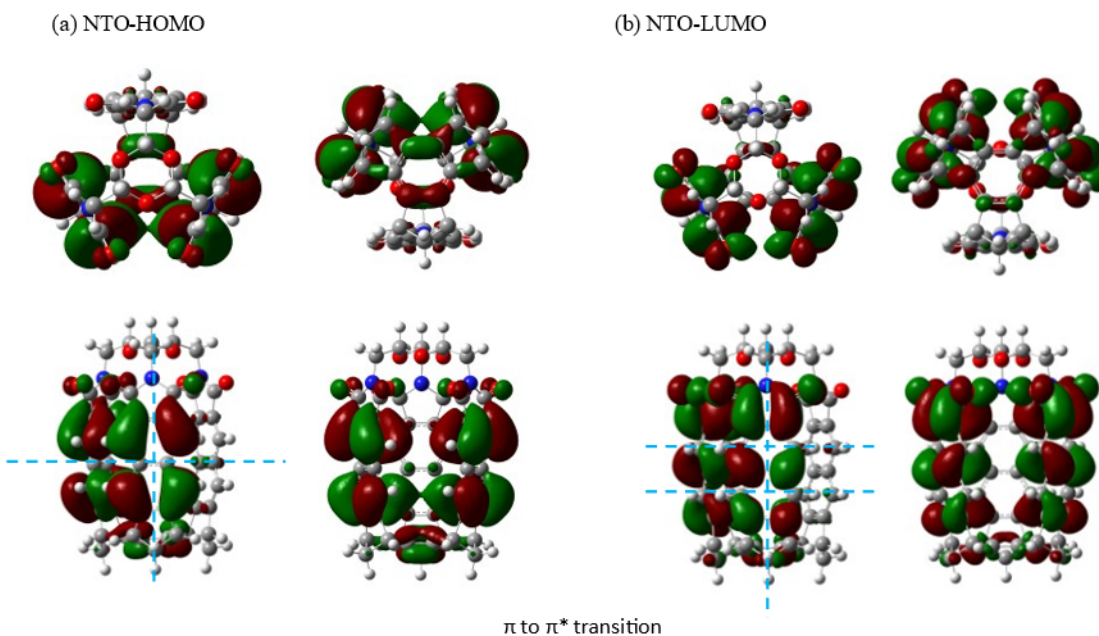

**Figure S51.** NTOs for the lowest energy UV transition of **8**. (a) HOMO orbital for the first transition. (b) LUMO orbital for the first transition. To visualize the orbitals, we used GaussView 6.0.

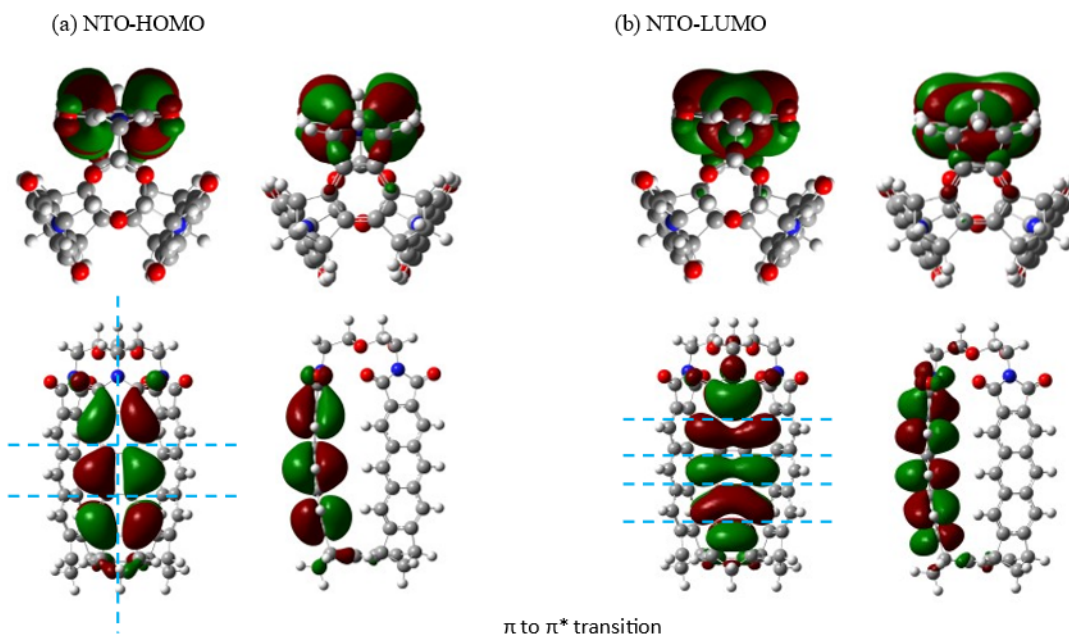

**Figure S52.** NTOs for the lowest energy UV transition of **8**. (a) HOMO orbital for the first transition. (b) LUMO orbital for the first transition. To visualize the orbitals, we used GaussView 6.0.

## Molecular coordinates for computed structures (B3LYP/6-31+G\*)

Acetaldehyde

E(RB3LYP) = 153.838116

Number of imaginary frequencies: 0

Cartesian Coordinates:

|   |             |             |             |
|---|-------------|-------------|-------------|
| C | 0.07645200  | -0.93507300 | 0.00002400  |
| H | 0.60788100  | -1.91174900 | 0.00252300  |
| C | -1.43530300 | -0.98471300 | 0.00001300  |
| H | -1.81056900 | -2.01246400 | 0.00154300  |
| H | -1.81784500 | -0.45641400 | 0.88180400  |
| H | -1.81778600 | -0.45897400 | -0.88332500 |
| O | 0.71416900  | 0.09738800  | -0.00258200 |

Methyl Trioxane

E(RB3LYP) = -461.556155

Number of imaginary frequencies: 0

Cartesian Coordinates:

|   |             |             |             |
|---|-------------|-------------|-------------|
| C | 0.46883600  | -1.67076600 | 0.06212700  |
| C | 0.47014500  | 0.40777700  | 1.15054100  |
| C | -1.46825100 | -0.91397500 | 1.14807500  |
| H | 0.80737600  | -2.16925700 | 0.98994900  |
| H | 0.80872600  | -0.07122000 | 2.08856800  |
| H | -1.14737300 | -1.40534500 | 2.08590900  |
| O | 0.97551800  | -0.34469300 | 0.05800600  |
| O | -0.95064200 | -1.65771900 | 0.05535000  |
| O | -0.94936600 | 0.40728800  | 1.13676000  |
| C | -2.97334500 | -0.85264200 | 1.03278300  |
| H | -3.38901100 | -1.86489500 | 1.04358100  |
| H | -3.38798700 | -0.28468500 | 1.87126400  |
| H | -3.25150100 | -0.36154900 | 0.09554100  |
| C | 0.96299400  | 1.83139300  | 1.03750800  |
| H | 0.58423100  | 2.42405400  | 1.87587100  |
| H | 2.05711200  | 1.84855700  | 1.05032800  |
| H | 0.60915400  | 2.27059700  | 0.10003500  |
| C | 0.96024400  | -2.38924400 | -1.17264900 |
| H | 2.05433400  | -2.41079200 | -1.18004800 |
| H | 0.58030200  | -3.41545700 | -1.18209900 |
| H | 0.60650400  | -1.86842600 | -2.06740100 |

Phthalimide Aldehyde S3

E(RB3LYP) = -665.770102

Number of imaginary frequencies: 0

Cartesian Coordinates:

|   |            |             |             |
|---|------------|-------------|-------------|
| C | 5.76429500 | -3.83366700 | 0.16423200  |
| C | 4.36805100 | -3.86169700 | 0.07566600  |
| C | 3.62612300 | -2.69710400 | -0.06800700 |
| C | 4.33212100 | -1.48523100 | -0.12227400 |
| C | 5.73063700 | -1.45723200 | -0.03319100 |
| C | 6.47164800 | -2.64020600 | 0.11280400  |
| C | 6.24759300 | -5.23502300 | 0.30978600  |
| C | 3.92688400 | -5.28179400 | 0.16334000  |
| H | 2.54257600 | -2.72204800 | -0.13804900 |
| H | 3.78589500 | -0.55292600 | -0.23651500 |
| H | 6.24957900 | -0.50374900 | -0.07922700 |
| H | 7.55548400 | -2.62188600 | 0.18096000  |
| N | 5.09783600 | -6.03981600 | 0.31920700  |

|   |            |             |             |
|---|------------|-------------|-------------|
| O | 2.79964500 | -5.74614600 | 0.12630000  |
| O | 7.38841900 | -5.65368200 | 0.41436800  |
| C | 5.12328700 | -7.48162200 | 0.38007100  |
| H | 5.98054000 | -7.80751300 | 0.98188000  |
| H | 4.21711300 | -7.84368000 | 0.88101700  |
| C | 5.21528000 | -8.14851200 | -0.97911500 |
| O | 5.26543500 | -7.55492000 | -2.03648400 |
| H | 5.23406000 | -9.25554900 | -0.93996900 |

Phthalimide Trioxane (3)

E(RB3LYP) = -1997.334723

Number of imaginary frequencies: 0

Cartesian Coordinates:

|   |              |             |              |
|---|--------------|-------------|--------------|
| C | -13.17061900 | -5.81893100 | -13.82195800 |
| C | -13.64561500 | -4.67650000 | -13.16987400 |
| C | -14.68129400 | -4.74433800 | -12.24768700 |
| C | -15.23882600 | -6.00753700 | -11.99614200 |
| C | -14.76345000 | -7.15251000 | -12.65057400 |
| C | -13.71380800 | -7.07350500 | -13.57882100 |
| C | -12.06353900 | -5.40530900 | -14.72894600 |
| C | -12.85171100 | -3.50690700 | -13.64287600 |
| H | -15.04617100 | -3.85538600 | -11.74136800 |
| H | -16.05195000 | -6.10042900 | -11.28126400 |
| H | -15.21481700 | -8.11700400 | -12.43421900 |
| H | -13.34120000 | -7.95888200 | -14.08588000 |
| N | -11.94301900 | -4.01618500 | -14.58981300 |
| O | -12.92351800 | -2.34176700 | -13.29643700 |
| O | -11.36838200 | -6.09376300 | -15.45983600 |
| C | -10.94600300 | -3.21346200 | -15.27758000 |
| H | -10.91595900 | -2.23455900 | -14.79420200 |
| H | -9.96679600  | -3.69197400 | -15.18424100 |
| C | -11.25614100 | -3.03549600 | -16.75964200 |
| H | -11.31657300 | -3.99957300 | -17.28637900 |
| C | -12.74192900 | -2.06960900 | -18.27351700 |
| C | -10.44434600 | -1.98211600 | -18.68028800 |
| H | -12.82683400 | -3.01906500 | -18.82351200 |
| H | -10.48380200 | -2.92564400 | -19.24541000 |
| O | -12.48579500 | -2.34584200 | -16.90589700 |
| O | -11.68172600 | -1.30373000 | -18.82348200 |
| O | -10.19581000 | -2.26923800 | -17.31320900 |
| C | -9.31559300  | -1.07569600 | -19.15877200 |
| N | -9.43660200  | -0.73022800 | -20.56484600 |
| H | -8.36445500  | -1.58961500 | -18.99376500 |
| H | -9.32880400  | -0.14772200 | -18.58309200 |
| C | -9.11531300  | -1.60171600 | -21.61519800 |
| C | -9.82761900  | 0.53519600  | -21.03976100 |
| C | -9.35176300  | -0.84022800 | -22.87311000 |
| O | -8.71885700  | -2.74745400 | -21.47070500 |
| C | -9.78252700  | 0.44462100  | -22.52702600 |
| O | -10.11621500 | 1.48887000  | -20.33870400 |
| C | -9.20304500  | -1.22471100 | -24.19898800 |
| C | -10.08015100 | 1.39558700  | -23.49390600 |
| C | -9.50394800  | -0.27154600 | -25.18413000 |
| H | -8.86747100  | -2.22322100 | -24.46384900 |
| C | -9.93509500  | 1.01646600  | -24.83743900 |
| H | -10.41256600 | 2.39329300  | -23.22225800 |
| H | -9.40088100  | -0.53548000 | -26.23314300 |
| H | -10.16007700 | 1.73302500  | -25.62261700 |
| C | -14.00466800 | -1.22364700 | -18.39220100 |
| N | -15.18085800 | -1.89334000 | -17.86355900 |



|   |              |             |              |
|---|--------------|-------------|--------------|
| H | -14.16438000 | -0.98631600 | -19.44801900 |
| H | -13.87056000 | -0.29584700 | -17.83189800 |
| C | -15.83217900 | -2.95710500 | -18.50140400 |
| C | -15.84997000 | -1.50251300 | -16.68821500 |
| C | -17.00154200 | -3.30193000 | -17.64487700 |
| O | -15.47294900 | -3.46183700 | -19.55403300 |
| C | -17.01058400 | -2.42814500 | -16.55287000 |
| O | -15.52168400 | -0.57559100 | -15.97018200 |
| C | -17.97523300 | -4.27952400 | -17.80133300 |
| C | -17.99431700 | -2.49670200 | -15.57557300 |
| C | -18.97292100 | -4.35893100 | -16.81747600 |
| H | -17.96664700 | -4.95537200 | -18.65167800 |
| C | -18.98228100 | -3.48250600 | -15.72340300 |
| H | -17.99915000 | -1.81477700 | -14.73014800 |
| H | -19.75218700 | -5.11115600 | -16.90550800 |
| H | -19.76887400 | -3.56754100 | -14.97846100 |

Basket Aldehyde (2)

E(RB3LYP) = -2572.517622

Number of imaginary frequencies: 0

Cartesian Coordinates:

|   |             |             |             |
|---|-------------|-------------|-------------|
| O | 15.18208900 | 48.70030000 | 24.05947100 |
| O | 6.13397200  | 50.54701600 | 22.71631500 |
| O | 12.63278700 | 55.41251700 | 18.07581900 |
| O | 16.66582500 | 51.90442500 | 21.11560900 |
| O | 9.15223600  | 47.91674700 | 24.97619100 |
| O | 8.12358200  | 54.83673100 | 18.76357900 |
| N | 16.03713700 | 50.49430700 | 22.85356400 |
| N | 7.57017300  | 49.40163400 | 24.14053500 |
| N | 10.36608900 | 55.42564200 | 18.59324800 |
| C | 12.55095700 | 48.22406200 | 17.50952700 |
| C | 10.74006900 | 47.05637000 | 18.63037000 |
| C | 10.24505600 | 48.82975700 | 17.04618100 |
| C | 12.08933300 | 47.22885100 | 18.42484600 |
| C | 9.80059000  | 47.87200900 | 17.92790400 |
| C | 11.64635300 | 49.00916400 | 16.83301300 |
| C | 13.34299700 | 46.55143300 | 18.99145700 |
| C | 8.40969000  | 47.41971700 | 18.38813000 |
| C | 11.78366900 | 50.13967900 | 15.80621500 |
| H | 13.19730000 | 45.58530700 | 19.47592000 |
| H | 7.56917700  | 47.71490300 | 17.75905400 |
| H | 12.74658800 | 50.22446200 | 15.30137800 |
| C | 14.05257200 | 47.61747500 | 19.82874600 |
| C | 8.30838600  | 47.81094400 | 19.86385700 |
| C | 11.28390000 | 51.40510400 | 16.50599500 |
| C | 14.51017500 | 48.60472200 | 18.92139300 |
| C | 9.23984400  | 47.00194200 | 20.56050700 |
| C | 9.89434200  | 51.22731100 | 16.71793900 |
| C | 14.08233100 | 48.14605800 | 17.52582500 |
| C | 9.91434900  | 46.11326800 | 19.51363700 |
| C | 9.53900200  | 49.85244600 | 16.14809500 |
| H | 14.60212400 | 48.61663400 | 16.69053400 |
| H | 10.42874500 | 45.23192400 | 19.89829600 |
| H | 8.48056600  | 49.67828200 | 15.95128500 |
| C | 14.24818600 | 46.60365900 | 17.71805100 |
| C | 8.69286400  | 45.89234000 | 18.56340000 |
| C | 10.52312400 | 49.83417700 | 14.93356800 |
| H | 15.28341200 | 46.30586100 | 17.91642600 |
| H | 7.86769000  | 45.35655800 | 19.04474300 |
| H | 10.31105100 | 50.61850500 | 14.19904100 |

|   |             |             |             |
|---|-------------|-------------|-------------|
| H | 13.84338400 | 46.02338900 | 16.88248500 |
| H | 8.96565700  | 45.39815500 | 17.62522400 |
| H | 10.57254600 | 48.85869700 | 14.43882600 |
| C | 14.26387700 | 47.72589800 | 21.20022800 |
| C | 7.51916700  | 48.75222900 | 20.51851900 |
| C | 11.94787800 | 52.55784300 | 16.91534100 |
| H | 13.91926200 | 46.97421300 | 21.90526300 |
| H | 6.79896500  | 49.37598000 | 19.99576700 |
| H | 13.01239500 | 52.70659200 | 16.75525600 |
| C | 14.96200500 | 48.85920500 | 21.62373200 |
| C | 7.69437700  | 48.84166900 | 21.90142400 |
| C | 11.15982500 | 53.52958600 | 17.53640200 |
| C | 15.41357100 | 49.83347600 | 20.72837600 |
| C | 8.61306700  | 48.04283600 | 22.58883600 |
| C | 9.78862500  | 53.35424000 | 17.74559000 |
| C | 15.19607000 | 49.73676700 | 19.35199500 |
| C | 9.41606400  | 47.10385300 | 21.93734700 |
| C | 9.11752600  | 52.19577900 | 17.34727300 |
| H | 15.55415200 | 50.49888400 | 18.66505100 |
| H | 10.12487500 | 46.48633700 | 22.48248200 |
| H | 8.05067300  | 52.07176400 | 17.51269100 |
| C | 15.36979200 | 49.26755800 | 22.99539500 |
| C | 7.00622700  | 49.71206800 | 22.89306900 |
| C | 11.54109700 | 54.86712200 | 18.06585700 |
| C | 16.11971700 | 50.88613200 | 21.50816000 |
| C | 8.53132900  | 48.38388700 | 24.03511200 |
| C | 9.26309700  | 54.57597300 | 18.41313800 |
| C | 7.12740200  | 49.97130500 | 25.38988300 |
| H | 6.82932000  | 51.01520300 | 25.23316100 |
| H | 7.95883200  | 49.97419300 | 26.10549400 |
| C | 10.27776400 | 56.75796200 | 19.13988700 |
| H | 9.49688300  | 56.78807300 | 19.90987500 |
| H | 11.22521500 | 57.01780800 | 19.62769100 |
| C | 16.65991300 | 51.20625500 | 23.94294200 |
| H | 16.09067900 | 51.03380200 | 24.86464800 |
| H | 16.63419100 | 52.28406500 | 23.74060300 |
| C | 18.10078700 | 50.80450100 | 24.19343700 |
| H | 18.58487600 | 51.35153100 | 25.02662300 |
| C | 9.96666200  | 57.82364300 | 18.10660300 |
| H | 9.89722800  | 58.84939100 | 18.51997600 |
| C | 5.96159200  | 49.23360800 | 26.02006900 |
| H | 5.61187600  | 49.67186800 | 26.97580600 |
| O | 9.80111500  | 57.60984200 | 16.92327800 |
| O | 18.70332300 | 49.96303800 | 23.55925800 |
| O | 5.43308700  | 48.24753300 | 25.54926300 |

Benzene Capsularene (1)

E(RB3LYP) = -2572.516041

Number of imaginary frequencies: 0

Cartesian Coordinates:

|   |             |              |              |
|---|-------------|--------------|--------------|
| O | -4.98436600 | -8.08800700  | -11.14010500 |
| O | -5.15770700 | -9.47642800  | -9.28396800  |
| O | -5.58869200 | -7.20096700  | -9.07762800  |
| O | -4.57864200 | -6.12107600  | -6.10229700  |
| O | -2.83571300 | -11.86162200 | -9.44725700  |
| O | -2.52071400 | -9.11100500  | -13.09953100 |
| O | -4.33427700 | -4.14805800  | -8.74942800  |
| O | -3.69266300 | -10.59961000 | -6.51295600  |
| N | -3.07562000 | -10.34781300 | -11.20380000 |
| N | -4.41876900 | -8.38627000  | -6.62750300  |

|   |             |              |              |
|---|-------------|--------------|--------------|
| N | -4.04587700 | -5.30293600  | -10.75326900 |
| C | -2.20481000 | -9.63109700  | -12.04461100 |
| C | -2.20010400 | -8.71488400  | -6.06326000  |
| C | 0.15473300  | -4.26831600  | -9.15267000  |
| C | -2.12492100 | -4.51339400  | -9.73432800  |
| C | -0.86751600 | -9.68247800  | -11.38759300 |
| C | -0.90906900 | -9.23327500  | -5.94042700  |
| H | -0.71288400 | -10.29634500 | -6.04858500  |
| C | 0.10304000  | -10.71402200 | -9.39448700  |
| H | 0.01082600  | -11.36029100 | -8.52610400  |
| C | -0.96482900 | -10.51903900 | -10.27352800 |
| C | 1.35911900  | -9.14092600  | -10.79823000 |
| C | 2.39061800  | -8.33402600  | -8.32214400  |
| C | -3.91757800 | -7.13761800  | -6.21640600  |
| C | 2.23435200  | -6.13330700  | -9.34111600  |
| C | 2.49288700  | -7.48066800  | -9.46319900  |
| C | -3.60812100 | -4.59881700  | -9.61691600  |
| C | 1.86031000  | -5.58977500  | -8.07412200  |
| C | -2.46853600 | -7.35001700  | -5.93858500  |
| C | -1.75812500 | -5.04206400  | -10.97371000 |
| C | -1.46219800 | -6.41508200  | -5.68449100  |
| H | -1.68279400 | -5.35466700  | -5.59965100  |
| C | -5.33683700 | -9.38740400  | -10.68960600 |
| H | -6.39990400 | -9.56820700  | -10.92477800 |
| C | -2.36531500 | -11.02312600 | -10.19482800 |
| C | -4.50793400 | -10.45190200 | -11.40782300 |
| H | -4.71179600 | -10.37394600 | -12.47898200 |
| H | -4.83722700 | -11.43256100 | -11.05444600 |
| C | 1.44601200  | -4.13433200  | -8.33768600  |
| H | 1.40288900  | -3.47228300  | -7.47207300  |
| C | 1.63110000  | -8.44637400  | -5.76099500  |
| H | 2.02438700  | -9.44231600  | -5.55426100  |
| C | 0.10551200  | -8.30259000  | -5.73449600  |
| C | -5.77256400 | -7.10675800  | -10.48310800 |
| H | -6.83576000 | -7.29121000  | -10.71532300 |
| C | -2.99876900 | -5.47524500  | -11.67704600 |
| C | 2.69807200  | -8.40467900  | -10.67292300 |
| H | 3.08059300  | -7.94251200  | -11.58365000 |
| C | 1.75977300  | -6.41269000  | -6.97425400  |
| C | -5.77050700 | -8.60565000  | -7.10511200  |
| H | -6.08763300 | -9.60629200  | -6.79981200  |
| H | -6.42661200 | -7.86761000  | -6.63629500  |
| C | 3.54962700  | -9.52594000  | -10.00478600 |
| H | 4.52273500  | -9.16927200  | -9.65169600  |
| H | 3.68156800  | -10.40225400 | -10.64831900 |
| C | 0.30502100  | -8.98809900  | -11.69511100 |
| H | 0.36462300  | -8.33347000  | -12.56009800 |
| C | 2.03179000  | -7.80945200  | -7.10007100  |
| C | 1.25928100  | -9.98794700  | -9.66715200  |
| C | 2.04610800  | -5.00368700  | -10.36502100 |
| C | -0.42205700 | -5.18181100  | -11.35630000 |
| C | 0.52676800  | -4.80624500  | -10.40929600 |
| C | 2.53591000  | -9.77051300  | -8.84677400  |
| H | 2.77197600  | -10.54014100 | -8.111105400 |
| C | -0.16592300 | -6.91783900  | -5.60968500  |
| C | 1.19389600  | -6.21146000  | -5.56027900  |
| H | 1.19316100  | -5.19204200  | -5.17280900  |
| C | -5.41988200 | -5.70654500  | -10.98436300 |
| H | -6.07892200 | -4.99206300  | -10.48405200 |
| H | -5.61364500 | -5.67431900  | -12.05971500 |
| C | -3.47042200 | -9.40541500  | -6.42454500  |
| C | 2.44158800  | -3.78121800  | -9.48328500  |

|   |             |             |              |
|---|-------------|-------------|--------------|
| H | 3.48795800  | -3.80750400 | -9.16207400  |
| C | -5.94299200 | -8.49782000 | -8.61999300  |
| H | -7.00705700 | -8.67859100 | -8.85188800  |
| C | -1.17945200 | -4.08846100 | -8.79797700  |
| H | -1.47828200 | -3.68759600 | -7.83347800  |
| C | 2.01819100  | -7.28836300 | -4.79267100  |
| H | 3.09280600  | -7.07863000 | -4.78645600  |
| H | 1.66113400  | -7.44999400 | -3.76999000  |
| H | -0.15020600 | -5.60478000 | -12.31938200 |
| H | 2.21915500  | -2.82114500 | -9.96107700  |
| O | -3.12921600 | -5.87688700 | -12.81934900 |
| H | 2.54432200  | -5.12610900 | -11.32735100 |

Naphthalene Capsularene (8)

E(RB3LYP) = -3033.489751

Number of imaginary frequencies: 0

Cartesian Coordinates:

|   |             |             |             |
|---|-------------|-------------|-------------|
| O | 1.16243400  | 0.66405300  | -5.05243300 |
| O | 0.00000000  | -1.34978300 | -5.06871000 |
| O | -1.16243400 | 0.66405300  | -5.05243300 |
| O | -4.01344900 | 0.32668400  | -3.32386000 |
| O | 1.70646800  | -3.63630800 | -3.31499600 |
| O | 4.01344700  | 0.32668600  | -3.32385900 |
| O | -2.29270800 | 3.28198100  | -3.30227100 |
| O | -1.70646800 | -3.63630800 | -3.31499600 |
| N | 2.61019900  | -1.51009900 | -3.63506900 |
| N | -2.61019900 | -1.51009900 | -3.63506900 |
| N | 0.00000000  | 2.99856800  | -3.61717500 |
| C | 3.36355300  | -0.59900300 | -2.86875800 |
| C | -0.71558000 | 3.00979600  | 3.36535300  |
| C | -2.03429200 | -2.81634900 | 2.18974700  |
| H | -1.48523100 | -3.75528000 | 2.17910000  |
| C | 2.03429300  | -2.81634900 | 2.18974700  |
| H | 1.48523100  | -3.75528000 | 2.17910100  |
| C | 2.49275600  | -2.26978000 | 0.95149700  |
| C | 2.95654400  | -0.87640300 | 3.34904100  |
| C | 0.68968300  | -1.21904900 | 4.96423000  |
| C | -3.36355300 | -0.59900400 | -2.86875800 |
| C | 0.71383400  | 1.21189100  | 4.97164300  |
| C | 1.40342300  | 0.01747200  | 4.96574400  |
| C | -1.16444500 | 3.19284200  | -2.84960400 |
| C | -0.71383400 | 1.21189100  | 4.97164300  |
| C | -3.21527900 | -1.02023200 | 0.95043700  |
| C | 0.72173300  | 3.30018300  | 0.96685500  |
| C | -3.45953100 | -0.34838500 | 2.18822000  |
| H | -3.99947500 | 0.59575100  | 2.17666300  |
| C | 1.16583400  | -0.67631300 | -5.52231800 |
| H | 1.16241300  | -0.66461100 | -6.62588400 |
| C | 2.19277200  | -2.61293500 | -2.86497800 |
| C | 2.42983400  | -1.40780300 | -5.07185400 |
| H | 3.29007300  | -0.87841700 | -5.48956400 |
| H | 2.40063500  | -2.41767900 | -5.48899500 |
| C | -1.14520900 | 2.67408300  | 4.79620300  |
| H | -2.17557500 | 2.91568300  | 5.05935500  |
| C | -1.74032300 | -2.32278600 | 4.78169900  |
| H | -1.43636100 | -3.33681500 | 5.04386500  |
| C | -2.24119400 | -2.11602000 | 3.34957500  |
| C | 0.00000000  | 1.33947300  | -5.51082500 |
| H | 0.00000000  | 1.33491900  | -6.61429000 |
| C | 1.16444600  | 3.19284100  | -2.84960400 |

|   |             |             |             |
|---|-------------|-------------|-------------|
| C | 2.88469700  | -0.33882200 | 4.78155400  |
| H | 3.60978000  | 0.43247900  | 5.04353200  |
| C | -1.40342300 | 0.01747200  | 4.96574400  |
| C | -2.42983400 | -1.40780300 | -5.07185400 |
| H | -2.40063500 | -2.41767900 | -5.48899500 |
| H | -3.29007300 | -0.87841700 | -5.48956400 |
| C | 2.92882600  | -1.68625000 | 5.56509700  |
| H | 2.71831200  | -1.56461800 | 6.63276900  |
| H | 3.87016400  | -2.22933500 | 5.42767100  |
| C | 3.45953000  | -0.34838500 | 2.18822000  |
| H | 3.99947400  | 0.59575100  | 2.17666300  |
| C | -0.68968300 | -1.21904900 | 4.96423000  |
| C | 2.24119400  | -2.11602000 | 3.34957500  |
| C | 1.14520900  | 2.67408300  | 4.79620300  |
| C | 1.42501600  | 3.17926400  | 2.20500800  |
| C | 0.71558000  | 3.00979600  | 3.36535300  |
| C | 1.74032300  | -2.32278600 | 4.78169900  |
| H | 1.43636100  | -3.33681500 | 5.04386600  |
| C | -2.95654400 | -0.87640300 | 3.34904000  |
| C | -2.88469700 | -0.33882200 | 4.78155400  |
| H | -3.60978000 | 0.43247900  | 5.04353200  |
| C | 0.00000000  | 2.79720400  | -5.05454700 |
| H | -0.88896600 | 3.27911900  | -5.46954900 |
| H | 0.88896600  | 3.27911900  | -5.46954900 |
| C | -2.19277200 | -2.61293600 | -2.86497800 |
| C | 0.00000000  | 3.38178000  | 5.58280800  |
| H | 0.00000000  | 3.13421900  | 6.64943000  |
| C | -1.16583400 | -0.67631300 | -5.52231800 |
| H | -1.16241400 | -0.66461100 | -6.62588400 |
| C | -1.42501600 | 3.17926400  | 2.20500800  |
| H | -2.51276000 | 3.17252000  | 2.19408700  |
| C | -2.92882600 | -1.68624900 | 5.56509700  |
| H | -2.71831200 | -1.56461800 | 6.63276900  |
| H | -3.87016400 | -2.22933500 | 5.42767000  |
| H | 2.51276000  | 3.17251900  | 2.19408700  |
| H | 0.00000000  | 4.46912700  | 5.45008600  |
| O | 2.29270800  | 3.28197900  | -3.30227100 |
| H | 2.17557500  | 2.91568300  | 5.05935500  |
| C | -2.49275500 | -2.26978000 | 0.95149700  |
| C | -2.16968700 | -2.89922600 | -0.28562900 |
| C | -2.50715500 | -2.26398900 | -1.45477900 |
| H | -1.62086100 | -3.83741100 | -0.28678300 |
| C | -3.60041100 | -0.42914100 | -0.28817600 |
| C | -3.21681800 | -1.04000100 | -1.45639600 |
| H | -4.14200900 | 0.51330800  | -0.29098400 |
| C | 3.21527900  | -1.02023200 | 0.95043700  |
| C | 3.60041100  | -0.42914100 | -0.28817600 |
| C | 3.21681800  | -1.04000100 | -1.45639600 |
| H | 4.14200800  | 0.51330900  | -0.29098400 |
| C | 2.16968700  | -2.89922600 | -0.28562900 |
| C | 2.50715500  | -2.26398900 | -1.45477900 |
| H | 1.62086200  | -3.83741100 | -0.28678300 |
| C | -0.72173300 | 3.30018400  | 0.96685500  |
| C | -1.42741900 | 3.33021400  | -0.27109400 |
| C | -0.70732300 | 3.29674600  | -1.43924700 |
| H | -2.51446700 | 3.32623700  | -0.27307200 |
| C | 1.42741900  | 3.33021400  | -0.27109400 |
| C | 0.70732300  | 3.29674500  | -1.43924700 |
| H | 2.51446800  | 3.32623600  | -0.27307200 |

Anthracene Capsularene (9)

E(RB3LYP) = -3494.436446

Number of imaginary frequencies: 0

Cartesian Coordinates:

|   |             |             |             |
|---|-------------|-------------|-------------|
| O | 0.99009900  | 1.37728900  | -7.99471200 |
| O | 0.13968800  | -0.78502200 | -8.07204700 |
| O | -1.30813900 | 1.03204900  | -7.99977400 |
| O | -4.06591700 | 0.21224800  | -6.30014300 |
| O | 2.18007500  | -2.88050900 | -6.45990400 |
| O | 3.88043900  | 1.37742200  | -6.25384900 |
| O | -2.80930600 | 3.38745400  | -6.16843900 |
| O | -1.23811700 | -3.39693200 | -6.46996900 |
| N | 2.75595000  | -0.62859200 | -6.65320400 |
| N | -2.42335300 | -1.39952000 | -6.67747900 |
| N | -0.50004900 | 3.46868100  | -6.48748600 |
| C | 3.39067800  | 0.33700700  | -5.84661600 |
| C | -1.14627700 | 2.93064000  | 2.91467400  |
| C | -1.67164600 | -3.01922800 | 1.51700900  |
| H | -0.99808500 | -3.87208800 | 1.46563500  |
| C | 2.46205700  | -2.43265700 | 1.53375100  |
| H | 2.05416900  | -3.43970200 | 1.47714000  |
| C | 2.87319400  | -1.78141700 | 0.31853100  |
| C | 3.07695900  | -0.41490000 | 2.77327100  |
| C | 0.85627400  | -1.13681900 | 4.33193800  |
| C | -3.30926400 | -0.64742500 | -5.88053500 |
| C | 0.53840900  | 1.27166800  | 4.43136000  |
| C | 1.38922100  | 0.18604000  | 4.38796400  |
| C | -1.67907600 | 3.46398800  | -5.71616700 |
| C | -0.87456800 | 1.07093300  | 4.42856800  |
| C | -3.13685500 | -1.37321300 | 0.35271300  |
| C | 0.21612800  | 3.60657000  | 0.54304400  |
| C | -3.43781400 | -0.77196900 | 1.62438400  |
| H | -4.10745400 | 0.08501400  | 1.65417100  |
| C | 1.19032500  | 0.06718300  | -8.50497500 |
| H | 1.17774700  | 0.11156200  | -9.60757700 |
| C | 2.52610200  | -1.82805800 | -5.94962000 |
| C | 2.55189800  | -0.48240000 | -8.08331700 |
| H | 3.31962200  | 0.19160700  | -8.47214500 |
| H | 2.67491500  | -1.46380000 | -8.54881000 |
| C | -1.50884400 | 2.46325600  | 4.32612000  |
| H | -2.56069700 | 2.54323300  | 4.60313100  |
| C | -1.39532800 | -2.56427800 | 4.11297000  |
| H | -0.94642600 | -3.53275200 | 4.33666700  |
| C | -1.94260300 | -2.38613600 | 2.69455200  |
| C | -0.26078500 | 1.88722700  | -8.43345700 |
| H | -0.26277600 | 1.91782100  | -9.53654500 |
| C | 0.62736600  | 3.82221800  | -5.72002300 |
| C | 2.90747000  | 0.04747300  | 4.22181500  |
| H | 3.51297100  | 0.90150300  | 4.52764400  |
| C | -1.38993500 | -0.20808100 | 4.37750800  |
| C | -2.25585600 | -1.20210900 | -8.10571700 |
| H | -2.08089900 | -2.17684600 | -8.56852100 |
| H | -3.18263000 | -0.78221300 | -8.50527000 |
| C | 3.12943000  | -1.31062100 | 4.95539400  |
| H | 2.89032000  | -1.26157000 | 6.02292400  |
| H | 4.13946100  | -1.71124900 | 4.81556400  |
| C | 3.52885000  | 0.21867800  | 1.65333600  |
| H | 3.93190500  | 1.22864300  | 1.68809600  |
| C | -0.50987700 | -1.33037200 | 4.32581500  |
| C | 2.53843800  | -1.75164200 | 2.71338600  |
| C | 0.75985300  | 2.78605200  | 4.32684400  |
| C | 0.94652300  | 3.48939500  | 1.77723800  |

|   |             |             |             |
|---|-------------|-------------|-------------|
| C | 0.28161200  | 3.13471300  | 2.91452000  |
| C | 2.05161300  | -2.07614300 | 4.12814700  |
| H | 1.88794100  | -3.13136100 | 4.35003600  |
| C | -2.83286700 | -1.25258200 | 2.74856100  |
| C | -2.80874000 | -0.76262400 | 4.19838000  |
| H | -3.63022300 | -0.11135500 | 4.49926900  |
| C | -0.47686800 | 3.31314600  | -7.93067500 |
| H | -1.43019400 | 3.66832400  | -8.33031100 |
| H | 0.32817600  | 3.93542500  | -8.33002900 |
| C | -1.87027900 | -2.48281700 | -5.96709500 |
| C | -0.46895900 | 3.28657200  | 5.14650500  |
| H | -0.42682800 | 2.98943600  | 6.19965800  |
| C | -1.11124200 | -0.27702900 | -8.51348200 |
| H | -1.10294500 | -0.22638400 | -9.61556600 |
| C | -1.88437900 | 3.08064300  | 1.77756200  |
| H | -2.96088800 | 2.92349700  | 1.76700100  |
| C | -2.65000200 | -2.13014200 | 4.93115200  |
| H | -2.44218300 | -2.01798000 | 6.00047800  |
| H | -3.50746600 | -2.79590300 | 4.78382600  |
| H | 2.02335700  | 3.64446800  | 1.76638400  |
| H | -0.62313100 | 4.36835900  | 5.06804700  |
| O | 1.72454800  | 4.09506300  | -6.17818500 |
| H | 1.74737500  | 3.15621200  | 4.60488400  |
| C | -2.24262000 | -2.51110600 | 0.29830200  |
| C | -1.89595100 | -3.04545600 | -0.95102500 |
| H | -1.21887100 | -3.89629900 | -0.99275300 |
| C | -3.63055700 | -0.83696700 | -0.84533600 |
| C | -3.23657100 | -1.33223900 | -2.09700800 |
| H | -4.29652700 | 0.02261000  | -0.80508300 |
| C | 3.41243800  | -0.43865100 | 0.37954700  |
| C | 3.73842700  | 0.21972000  | -0.81459100 |
| H | 4.13607100  | 1.23155500  | -0.76955500 |
| C | 2.69354000  | -2.38654900 | -0.93386900 |
| C | 2.96177200  | -1.70627000 | -2.13085700 |
| H | 2.28357600  | -3.39338900 | -0.98108300 |
| C | -1.21687100 | 3.39690700  | 0.54323200  |
| C | -1.91123700 | 3.43641100  | -0.67432100 |
| H | -2.98644700 | 3.26916900  | -0.67538000 |
| C | 0.86824900  | 3.84876200  | -0.67491900 |
| C | 0.18327900  | 3.83308300  | -1.89909000 |
| H | 1.94543100  | 4.00269600  | -0.67648000 |
| C | -2.34071700 | -2.47236800 | -2.15138200 |
| C | -1.87651300 | -2.94795900 | -3.42226300 |
| C | -2.25905100 | -2.27767600 | -4.54947800 |
| H | -1.20301900 | -3.80022200 | -3.46540700 |
| C | -3.64650500 | -0.69492800 | -3.31487800 |
| C | -3.13904300 | -1.15665700 | -4.49633300 |
| H | -4.31505000 | 0.16144500  | -3.27603900 |
| C | 3.50070600  | -0.36051100 | -2.06878200 |
| C | 3.71710100  | 0.37289600  | -3.28174200 |
| C | 3.36230100  | -0.20693400 | -4.46645600 |
| H | 4.11807400  | 1.38231500  | -3.23682600 |
| C | 2.65291100  | -2.28681700 | -3.40563300 |
| C | 2.83355500  | -1.52967100 | -4.52847700 |
| H | 2.24832900  | -3.29461400 | -3.45497100 |
| C | -1.25162700 | 3.61765700  | -1.89852500 |
| C | -1.95539300 | 3.52984800  | -3.14503900 |
| C | -1.23968700 | 3.60971700  | -4.30585400 |
| H | -3.02964200 | 3.36307500  | -3.14661500 |
| C | 0.87916800  | 3.96084800  | -3.14710500 |
| C | 0.17001500  | 3.82627900  | -4.30730800 |
| H | 1.95425900  | 4.12226500  | -3.15023300 |

## References:

1. Frisch, M.J. et al. Gaussian 16, Revision C.01, Gaussian, Inc., Wallingford CT, 2016.
2. MacroModel, Schrödinger, LLC, New York, NY, 2021.
3. A.D. Becke, *J. Chem. Phys.*, 1993, **98**, 5648-5652.
4. A. V. Marenich, C. J. Cramer, and D. G. Truhlar, *J. Phys. Chem. B*, 2009, **113**, 6378-96.
5. M.L. Mason, R.F. Lalisie, T.J. Finnegan, C.M. Hadad, D.A. Modarelli, J.R. Parquette. *Langmuir*, 2019, **35**, 12460–12468.
6. M.J. Gunther, R.Z. Pavlovic, T.J Finnegan, X. Wang, J.D. Badjic, *Angew. Chem. Int. Ed.* 2021, **60**, 25075– 25081.
7. Yanai, T.; Tew, D.P.; Handy, N.C., *Chemical Physics Letters* 2004, **393**, 51-57.
8. Benjamin P. Pritchard, Doaa Altarawy, Brett Didier, Tara D. Gibson, Theresa L. Windus. *J Chem. Inf. Model.* 2019, **59**(11), 4814-4820.



## X-ray Crystallographic Data

**Compound 4:** The single crystal X-ray diffraction studies were carried out on a Nonius Kappa diffractometer equipped with a Bruker APEX-II CCD and Mo K<sub>α</sub> radiation ( $\lambda = 0.71073 \text{ \AA}$ ). A 0.384 x 0.363 x 0.257 mm piece of a colorless block was mounted on a MiTeGen Micromount with CHRISTO-LUBE MCG 1024 oil. Data were collected in a nitrogen gas stream at 100(2) K using  $\phi$  and  $\omega$  scans. Crystal-to-detector distance was 40 mm and exposure time was 5 seconds per frame using a scan width of 1.0°. Data collection was 100% complete to 25.00° in  $\theta$ . A total of 31039 reflections were collected covering the indices,  $-20 \leq h \leq 20$ ,  $-20 \leq k \leq 20$ ,  $-39 \leq l \leq 39$ . 3361 reflections were found to be symmetry independent, with a  $R_{\text{int}}$  of 0.0349. Indexing and unit cell refinement indicated a trigonal, rhombohedral lattice. The space group was found to be  $R\bar{3}$ . The data were integrated using the Bruker SAINT software program and scaled using the SADABS software program. Solution by direct methods (SHELXT) produced a complete phasing model for refinement.

All nonhydrogen atoms were refined anisotropically by full-matrix least-squares (SHELXL-2014). All hydrogen atoms were placed using a riding model. Their positions were constrained relative to their parent atom using the appropriate HFIX command in SHELXL-2014. Crystallographic data are summarized in Table 1.

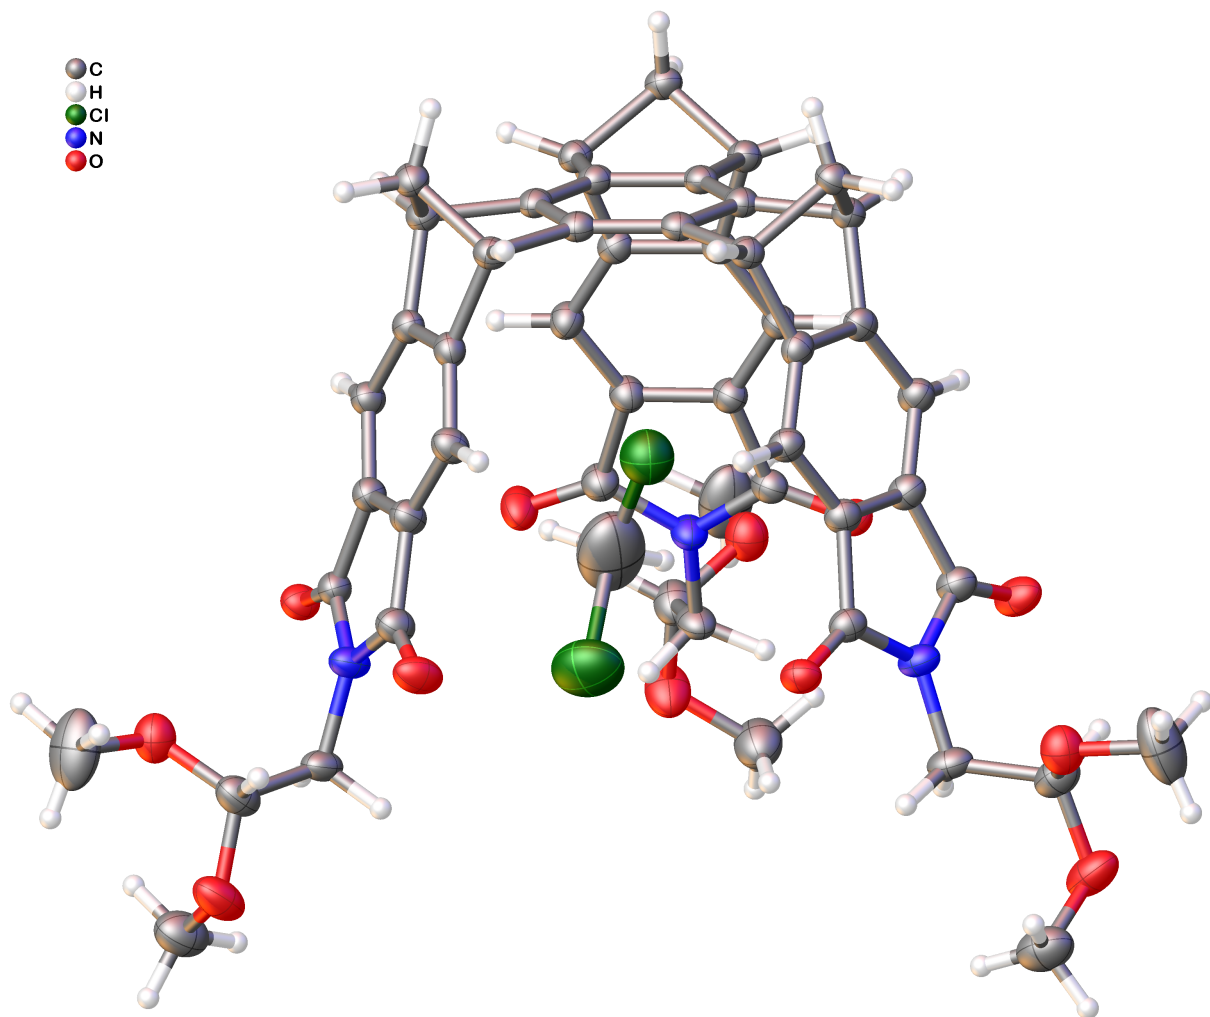

**Table 1.** Crystal data and structure refinement for Compound 4.

|                                 |                                                                                                                             |
|---------------------------------|-----------------------------------------------------------------------------------------------------------------------------|
| Report date                     | 2021-06-03                                                                                                                  |
| Identification code             | Trisacetal                                                                                                                  |
| Empirical formula               | C52.50 H48 Cl3 N3 O12                                                                                                       |
| Molecular formula               | C51 H45 N3 O12, 1.5(C1 H2 Cl2)                                                                                              |
| Formula weight                  | 1019.29                                                                                                                     |
| Temperature                     | 100.0 K                                                                                                                     |
| Wavelength                      | 0.71073 Å                                                                                                                   |
| Crystal system                  | Trigonal                                                                                                                    |
| Space group                     | R -3                                                                                                                        |
| Unit cell dimensions            | a = 16.2785(5) Å $\alpha = 90^\circ$ .<br>b = 16.2785(5) Å $\beta = 90^\circ$ .<br>c = 31.9470(10) Å $\gamma = 120^\circ$ . |
| Volume                          | 7331.4(5) Å <sup>3</sup>                                                                                                    |
| Z                               | 6                                                                                                                           |
| Density (calculated)            | 1.385 Mg/m <sup>3</sup>                                                                                                     |
| Absorption coefficient          | 0.255 mm <sup>-1</sup>                                                                                                      |
| F(000)                          | 3186                                                                                                                        |
| Crystal size                    | 0.384 x 0.363 x 0.257 mm <sup>3</sup>                                                                                       |
| Crystal color, habit            | Colorless Block                                                                                                             |
| Theta range for data collection | 1.579 to 26.434°.                                                                                                           |
| Index ranges                    | -20 ≤ h ≤ 20, -20 ≤ k ≤ 20, -39 ≤ l ≤ 39                                                                                    |
| Reflections collected           | 31039                                                                                                                       |
| Independent reflections         | 3361 [R(int) = 0.0349, R(sigma) = 0.0226]                                                                                   |
| Completeness to theta = 25.000° | 100.0 %                                                                                                                     |

|                                   |                                             |
|-----------------------------------|---------------------------------------------|
| Absorption correction             | Semi-empirical from equivalents             |
| Max. and min. transmission        | 0.0932 and 0.0665                           |
| Refinement method                 | Full-matrix least-squares on F <sup>2</sup> |
| Data / restraints / parameters    | 3361 / 15 / 241                             |
| Goodness-of-fit on F <sup>2</sup> | 1.085                                       |
| Final R indices [I>2sigma(I)]     | R1 = 0.0559, wR2 = 0.1503                   |
| R indices (all data)              | R1 = 0.0703, wR2 = 0.1612                   |
| Extinction coefficient            | n/a                                         |
| Largest diff. peak and hole       | 0.603 and -0.472 e.Å <sup>-3</sup>          |

**Table 2.** Atomic coordinates ( $\times 10^4$ ) and equivalent isotropic displacement parameters ( $\text{\AA}^2 \times 10^3$ )for compound **4**.  $U(\text{eq})$  is defined as one third of the trace of the orthogonalized  $U^{ij}$  tensor.

|       | x       | y       | z       | U(eq) |
|-------|---------|---------|---------|-------|
| O(1)  | 6790(1) | 9031(1) | 4330(1) | 37(1) |
| O(2)  | 5756(1) | 5857(1) | 4306(1) | 28(1) |
| O(3)  | 8128(1) | 7644(1) | 3974(1) | 40(1) |
| O(4)  | 8069(1) | 8324(1) | 3338(1) | 48(1) |
| N(1)  | 6374(1) | 7468(1) | 4220(1) | 28(1) |
| C(1)  | 4019(1) | 6395(1) | 6030(1) | 22(1) |
| C(2)  | 4288(1) | 7370(1) | 6031(1) | 22(1) |
| C(3)  | 5370(1) | 7933(1) | 6010(1) | 23(1) |
| C(4)  | 5585(1) | 7258(1) | 6274(1) | 25(1) |
| C(5)  | 4937(1) | 6361(1) | 6008(1) | 23(1) |
| C(6)  | 5335(1) | 6750(1) | 5576(1) | 23(1) |
| C(7)  | 5606(1) | 7716(1) | 5577(1) | 23(1) |
| C(8)  | 5981(2) | 8280(2) | 5227(1) | 27(1) |
| C(9)  | 6073(2) | 7832(2) | 4877(1) | 27(1) |
| C(10) | 5784(2) | 6871(1) | 4872(1) | 25(1) |
| C(11) | 5409(1) | 6302(1) | 5222(1) | 24(1) |
| C(12) | 6458(2) | 8227(2) | 4457(1) | 29(1) |
| C(13) | 5947(2) | 6625(2) | 4446(1) | 25(1) |
| C(14) | 6687(2) | 7552(2) | 3790(1) | 31(1) |
| C(15) | 7759(2) | 8133(2) | 3755(1) | 37(1) |

|        |          |          |         |        |
|--------|----------|----------|---------|--------|
| C(16)  | 9133(2)  | 8181(2)  | 4014(2) | 76(1)  |
| C(17)  | 7884(2)  | 7517(2)  | 3100(1) | 52(1)  |
| Cl(1B) | 4071(9)  | 7647(10) | 4479(6) | 110(4) |
| Cl(1S) | 3333     | 6667     | 4923(1) | 58(1)  |
| Cl(2S) | 2869(2)  | 5961(2)  | 4054(1) | 81(1)  |
| C(1S)  | 2803(9)  | 6680(10) | 4461(4) | 110(4) |
| Cl(3S) | 9665(6)  | 8541(6)  | 5072(2) | 94(2)  |
| Cl(4S) | 8709(5)  | 9630(8)  | 4954(2) | 94(2)  |
| C(2S)  | 8574(16) | 8509(15) | 4917(9) | 94(2)  |

---

**Table 3.** Bond lengths [Å] and angles [°] for compound 4.

|             |          |                 |           |
|-------------|----------|-----------------|-----------|
| O(1)-C(12)  | 1.210(3) | C(8)-H(8)       | 0.9500    |
| O(2)-C(13)  | 1.212(3) | C(8)-C(9)       | 1.384(3)  |
| O(3)-C(15)  | 1.401(3) | C(9)-C(10)      | 1.391(3)  |
| O(3)-C(16)  | 1.423(4) | C(9)-C(12)      | 1.484(3)  |
| O(4)-C(15)  | 1.402(3) | C(10)-C(11)     | 1.384(3)  |
| O(4)-C(17)  | 1.414(3) | C(10)-C(13)     | 1.480(3)  |
| N(1)-C(12)  | 1.397(3) | C(11)-H(11)     | 0.9500    |
| N(1)-C(13)  | 1.392(3) | C(14)-H(14A)    | 0.9900    |
| N(1)-C(14)  | 1.445(3) | C(14)-H(14B)    | 0.9900    |
| C(1)-C(2)   | 1.421(3) | C(14)-C(15)     | 1.517(3)  |
| C(1)-C(2)#1 | 1.366(3) | C(15)-H(15)     | 1.0000    |
| C(1)-C(5)   | 1.524(3) | C(16)-H(16A)    | 0.9800    |
| C(2)-C(3)   | 1.528(3) | C(16)-H(16B)    | 0.9800    |
| C(3)-H(3)   | 1.0000   | C(16)-H(16C)    | 0.9800    |
| C(3)-C(4)   | 1.557(3) | C(17)-H(17A)    | 0.9800    |
| C(3)-C(7)   | 1.523(3) | C(17)-H(17B)    | 0.9800    |
| C(4)-H(4A)  | 0.9900   | C(17)-H(17C)    | 0.9800    |
| C(4)-H(4B)  | 0.9900   | Cl(1B)-Cl(2S)#1 | 1.938(17) |
| C(4)-C(5)   | 1.556(3) | Cl(1B)-Cl(2S)#2 | 1.798(14) |
| C(5)-H(5)   | 1.0000   | Cl(1B)-C(1S)#2  | 2.15(2)   |
| C(5)-C(6)   | 1.523(3) | Cl(1B)-C(1S)#1  | 0.64(2)   |
| C(6)-C(7)   | 1.406(3) | Cl(1B)-C(1S)    | 1.869(16) |
| C(6)-C(11)  | 1.383(3) | Cl(1S)-C(1S)    | 1.716(12) |
| C(7)-C(8)   | 1.380(3) | Cl(1S)-C(1S)#1  | 1.716(12) |

|                  |            |                  |            |
|------------------|------------|------------------|------------|
| Cl(1S)-C(1S)#2   | 1.716(12)  | C(2)-C(3)-C(4)   | 98.77(15)  |
| Cl(2S)-Cl(2S)#1  | 1.752(6)   | C(4)-C(3)-H(3)   | 117.2      |
| Cl(2S)-Cl(2S)#2  | 1.752(6)   | C(7)-C(3)-C(2)   | 104.37(16) |
| Cl(2S)-C(1S)     | 1.791(12)  | C(7)-C(3)-H(3)   | 117.2      |
| Cl(2S)-C(1S)#2   | 1.453(14)  | C(7)-C(3)-C(4)   | 98.94(15)  |
| C(1S)-H(1SC)     | 0.9900     | C(3)-C(4)-H(4A)  | 112.8      |
| C(1S)-H(1SD)     | 0.9900     | C(3)-C(4)-H(4B)  | 112.8      |
| C(1S)-H(1SA)     | 0.9900     | H(4A)-C(4)-H(4B) | 110.2      |
| C(1S)-H(1SB)     | 0.9900     | C(5)-C(4)-C(3)   | 94.68(15)  |
| Cl(3S)-C(2S)     | 1.819(18)  | C(5)-C(4)-H(4A)  | 112.8      |
| Cl(4S)-C(2S)     | 1.730(18)  | C(5)-C(4)-H(4B)  | 112.8      |
| C(2S)-H(2SA)     | 0.9900     | C(1)-C(5)-C(4)   | 99.12(15)  |
| C(2S)-H(2SB)     | 0.9900     | C(1)-C(5)-H(5)   | 117.1      |
|                  |            | C(4)-C(5)-H(5)   | 117.1      |
| C(15)-O(3)-C(16) | 112.5(2)   | C(6)-C(5)-C(1)   | 104.35(15) |
| C(15)-O(4)-C(17) | 114.7(2)   | C(6)-C(5)-C(4)   | 98.98(16)  |
| C(12)-N(1)-C(14) | 123.86(18) | C(6)-C(5)-H(5)   | 117.1      |
| C(13)-N(1)-C(12) | 111.70(17) | C(7)-C(6)-C(5)   | 106.98(17) |
| C(13)-N(1)-C(14) | 124.44(18) | C(11)-C(6)-C(5)  | 130.77(19) |
| C(2)#1-C(1)-C(2) | 120.25(19) | C(11)-C(6)-C(7)  | 122.18(18) |
| C(2)-C(1)-C(5)   | 106.34(17) | C(6)-C(7)-C(3)   | 106.75(17) |
| C(2)#1-C(1)-C(5) | 133.35(18) | C(8)-C(7)-C(3)   | 131.40(18) |
| C(1)#2-C(2)-C(1) | 119.75(19) | C(8)-C(7)-C(6)   | 121.83(18) |
| C(1)-C(2)-C(3)   | 106.75(16) | C(7)-C(8)-H(8)   | 122.1      |
| C(1)#2-C(2)-C(3) | 133.43(18) | C(7)-C(8)-C(9)   | 115.79(19) |
| C(2)-C(3)-H(3)   | 117.2      | C(9)-C(8)-H(8)   | 122.1      |



|                     |            |                          |           |
|---------------------|------------|--------------------------|-----------|
| C(8)-C(9)-C(10)     | 122.37(19) | C(14)-C(15)-H(15)        | 108.0     |
| C(8)-C(9)-C(12)     | 129.61(19) | O(3)-C(16)-H(16A)        | 109.5     |
| C(10)-C(9)-C(12)    | 108.02(18) | O(3)-C(16)-H(16B)        | 109.5     |
| C(9)-C(10)-C(13)    | 107.98(17) | O(3)-C(16)-H(16C)        | 109.5     |
| C(11)-C(10)-C(9)    | 122.20(19) | H(16A)-C(16)-H(16B)      | 109.5     |
| C(11)-C(10)-C(13)   | 129.81(19) | H(16A)-C(16)-H(16C)      | 109.5     |
| C(6)-C(11)-C(10)    | 115.60(19) | H(16B)-C(16)-H(16C)      | 109.5     |
| C(6)-C(11)-H(11)    | 122.2      | O(4)-C(17)-H(17A)        | 109.5     |
| C(10)-C(11)-H(11)   | 122.2      | O(4)-C(17)-H(17B)        | 109.5     |
| O(1)-C(12)-N(1)     | 124.64(19) | O(4)-C(17)-H(17C)        | 109.5     |
| O(1)-C(12)-C(9)     | 129.4(2)   | H(17A)-C(17)-H(17B)      | 109.5     |
| N(1)-C(12)-C(9)     | 105.95(17) | H(17A)-C(17)-H(17C)      | 109.5     |
| O(2)-C(13)-N(1)     | 124.72(19) | H(17B)-C(17)-H(17C)      | 109.5     |
| O(2)-C(13)-C(10)    | 129.02(19) | Cl(2S)#2-Cl(1B)-Cl(2S)#1 | 55.8(5)   |
| N(1)-C(13)-C(10)    | 106.26(17) | Cl(2S)#2-Cl(1B)-C(1S)#2  | 53.0(4)   |
| N(1)-C(14)-H(14A)   | 109.3      | Cl(2S)#1-Cl(1B)-C(1S)#2  | 67.1(6)   |
| N(1)-C(14)-H(14B)   | 109.3      | Cl(2S)#2-Cl(1B)-C(1S)    | 76.3(6)   |
| N(1)-C(14)-C(15)    | 111.80(19) | Cl(2S)#1-Cl(1B)-H(1SC)#1 | 103.8(13) |
| H(14A)-C(14)-H(14B) | 107.9      | Cl(2S)#2-Cl(1B)-H(1SC)#1 | 123.2(14) |
| C(15)-C(14)-H(14A)  | 109.3      | Cl(2S)#2-Cl(1B)-H(1SD)#1 | 55.2(12)  |
| C(15)-C(14)-H(14B)  | 109.3      | Cl(2S)#1-Cl(1B)-H(1SD)#1 | 108.1(17) |
| O(3)-C(15)-O(4)     | 113.04(19) | C(1S)#1-Cl(1B)-Cl(2S)#2  | 48.3(18)  |
| O(3)-C(15)-C(14)    | 107.16(18) | C(1S)-Cl(1B)-Cl(2S)#1    | 44.8(5)   |
| O(3)-C(15)-H(15)    | 108.0      | C(1S)#1-Cl(1B)-Cl(2S)#1  | 67(2)     |
| O(4)-C(15)-C(14)    | 112.5(2)   | C(1S)#1-Cl(1B)-C(1S)     | 48(2)     |
| O(4)-C(15)-H(15)    | 108.0      | C(1S)#1-Cl(1B)-C(1S)#2   | 5.4(18)   |

|                          |           |                         |           |
|--------------------------|-----------|-------------------------|-----------|
| C(1S)-Cl(1B)-C(1S)#2     | 43.6(5)   | C(1S)#2-Cl(2S)-Cl(1B)#2 | 65.1(6)   |
| C(1S)-Cl(1B)-H(1SC)#1    | 60.4(10)  | C(1S)#2-Cl(2S)-Cl(1B)#1 | 19.2(8)   |
| C(1S)#1-Cl(1B)-H(1SC)#1  | 75(2)     | C(1S)#2-Cl(2S)-Cl(2S)#1 | 89.5(5)   |
| C(1S)#2-Cl(1B)-H(1SC)#1  | 70.1(13)  | C(1S)#2-Cl(2S)-Cl(2S)#2 | 67.2(6)   |
| C(1S)-Cl(1B)-H(1SD)#1    | 127.1(16) | C(1S)#2-Cl(2S)-C(1S)    | 54.5(8)   |
| C(1S)#2-Cl(1B)-H(1SD)#1  | 87.0(12)  | C(1S)-Cl(2S)-H(1SA)#2   | 53.1(10)  |
| C(1S)#1-Cl(1B)-H(1SD)#1  | 82(2)     | C(1S)#2-Cl(2S)-H(1SA)#2 | 42.9(5)   |
| H(1SC)#1-Cl(1B)-H(1SD)#1 | 129.1     | Cl(1B)-C(1S)-H(1SC)     | 111.8     |
| C(1S)-Cl(1S)-C(1S)#1     | 52.4(7)   | Cl(1B)-C(1S)-H(1SD)     | 111.8     |
| C(1S)#1-Cl(1S)-C(1S)#2   | 52.4(7)   | Cl(1S)-C(1S)-Cl(2S)     | 115.0(8)  |
| C(1S)-Cl(1S)-C(1S)#2     | 52.4(7)   | Cl(1S)-C(1S)-H(1SA)     | 108.5     |
| C(1S)-Cl(1S)-H(1SC)#1    | 64.9(8)   | Cl(1S)-C(1S)-H(1SA)#2   | 90.1(6)   |
| C(1S)#1-Cl(1S)-H(1SC)#1  | 34.4(3)   | Cl(1S)-C(1S)-H(1SB)     | 108.5     |
| C(1S)#2-Cl(1S)-H(1SC)#1  | 86.2(9)   | Cl(2S)-C(1S)-Cl(1B)     | 99.8(7)   |
| Cl(1B)#1-Cl(2S)-Cl(1B)#2 | 83.7(11)  | Cl(2S)-C(1S)-H(1SC)     | 111.8     |
| Cl(2S)#1-Cl(2S)-Cl(1B)#2 | 58.1(4)   | Cl(2S)-C(1S)-H(1SD)     | 111.8     |
| Cl(2S)#2-Cl(2S)-Cl(1B)#2 | 98.6(5)   | Cl(2S)-C(1S)-H(1SA)#2   | 35.3(3)   |
| Cl(2S)#2-Cl(2S)-Cl(1B)#1 | 66.2(6)   | Cl(2S)-C(1S)-H(1SA)     | 108.5     |
| Cl(2S)#1-Cl(2S)-Cl(1B)#1 | 104.1(4)  | Cl(2S)-C(1S)-H(1SB)     | 108.5     |
| Cl(2S)#2-Cl(2S)-Cl(2S)#1 | 60.002(1) | H(1SC)-C(1S)-H(1SD)     | 109.5     |
| Cl(2S)#2-Cl(2S)-C(1S)    | 79.6(4)   | H(1SA)-C(1S)-H(1SA)#2   | 143.2     |
| Cl(2S)#1-Cl(2S)-C(1S)    | 48.4(5)   | H(1SA)-C(1S)-H(1SB)     | 107.5     |
| Cl(2S)#2-Cl(2S)-H(1SA)#2 | 108.8(9)  | H(1SB)-C(1S)-H(1SA)#2   | 95.4      |
| Cl(2S)#1-Cl(2S)-H(1SA)#2 | 101.5(7)  | Cl(3S)-C(2S)-H(2SA)     | 109.6     |
| C(1S)-Cl(2S)-Cl(1B)#1    | 73.6(7)   | Cl(3S)-C(2S)-H(2SB)     | 109.6     |
| C(1S)-Cl(2S)-Cl(1B)#2    | 19.2(7)   | Cl(4S)-C(2S)-Cl(3S)     | 110.1(12) |

|                     |       |
|---------------------|-------|
| Cl(4S)-C(2S)-H(2SA) | 109.6 |
| Cl(4S)-C(2S)-H(2SB) | 109.6 |
| H(2SA)-C(2S)-H(2SB) | 108.1 |

---

Symmetry transformations used to generate equivalent atoms:

#1  $-x+y, -x+1, z$  #2  $-y+1, x-y+1, z$

**Table 4.** Anisotropic displacement parameters ( $\text{\AA}^2 \times 10^3$ ) for compound **4**. The anisotropic displacement factor exponent takes the form:  $-2\pi^2 [ h^2 a^{*2}U^{11} + \dots + 2 h k a^* b^* U^{12} ]$

|       | U <sup>11</sup> | U <sup>22</sup> | U <sup>33</sup> | U <sup>23</sup> | U <sup>13</sup> | U <sup>12</sup> |
|-------|-----------------|-----------------|-----------------|-----------------|-----------------|-----------------|
| O(1)  | 51(1)           | 29(1)           | 32(1)           | 7(1)            | 11(1)           | 20(1)           |
| O(2)  | 34(1)           | 28(1)           | 25(1)           | -1(1)           | 2(1)            | 18(1)           |
| O(3)  | 36(1)           | 37(1)           | 49(1)           | -1(1)           | -1(1)           | 20(1)           |
| O(4)  | 57(1)           | 44(1)           | 46(1)           | 10(1)           | 23(1)           | 28(1)           |
| N(1)  | 37(1)           | 29(1)           | 22(1)           | 3(1)            | 6(1)            | 18(1)           |
| C(1)  | 26(1)           | 25(1)           | 16(1)           | -1(1)           | -1(1)           | 14(1)           |
| C(2)  | 25(1)           | 24(1)           | 18(1)           | -1(1)           | -1(1)           | 11(1)           |
| C(3)  | 24(1)           | 23(1)           | 21(1)           | -1(1)           | 0(1)            | 11(1)           |
| C(4)  | 25(1)           | 28(1)           | 22(1)           | -2(1)           | -2(1)           | 14(1)           |
| C(5)  | 24(1)           | 24(1)           | 21(1)           | -1(1)           | -1(1)           | 12(1)           |
| C(6)  | 20(1)           | 25(1)           | 24(1)           | 2(1)            | 1(1)            | 11(1)           |
| C(7)  | 22(1)           | 26(1)           | 24(1)           | -2(1)           | -1(1)           | 13(1)           |
| C(8)  | 29(1)           | 24(1)           | 27(1)           | 0(1)            | 3(1)            | 14(1)           |
| C(9)  | 29(1)           | 26(1)           | 26(1)           | 2(1)            | 4(1)            | 15(1)           |
| C(10) | 26(1)           | 27(1)           | 24(1)           | 0(1)            | 1(1)            | 15(1)           |
| C(11) | 26(1)           | 24(1)           | 24(1)           | 1(1)            | 1(1)            | 14(1)           |
| C(12) | 34(1)           | 30(1)           | 27(1)           | 1(1)            | 4(1)            | 17(1)           |
| C(13) | 26(1)           | 29(1)           | 23(1)           | 2(1)            | 1(1)            | 16(1)           |
| C(14) | 42(1)           | 35(1)           | 21(1)           | 4(1)            | 6(1)            | 23(1)           |
| C(15) | 44(1)           | 35(1)           | 36(1)           | 4(1)            | 12(1)           | 22(1)           |

|        |        |        |        |        |        |       |
|--------|--------|--------|--------|--------|--------|-------|
| C(16)  | 46(2)  | 55(2)  | 123(3) | -21(2) | -27(2) | 22(2) |
| C(17)  | 68(2)  | 51(2)  | 44(2)  | 2(1)   | 12(1)  | 34(2) |
| Cl(1B) | 84(8)  | 101(9) | 150(9) | -24(7) | 24(6)  | 49(7) |
| Cl(1S) | 57(1)  | 57(1)  | 60(1)  | 0      | 0      | 28(1) |
| Cl(2S) | 107(2) | 75(2)  | 74(2)  | -8(1)  | 10(2)  | 56(2) |
| C(1S)  | 84(8)  | 101(9) | 150(9) | -24(7) | 24(6)  | 49(7) |
| Cl(3S) | 70(3)  | 130(5) | 63(2)  | 37(3)  | -6(2)  | 36(2) |
| Cl(4S) | 70(3)  | 130(5) | 63(2)  | 37(3)  | -6(2)  | 36(2) |
| C(2S)  | 70(3)  | 130(5) | 63(2)  | 37(3)  | -6(2)  | 36(2) |

---

**Table 5.** Hydrogen coordinates ( $\times 10^4$ ) and isotropic displacement parameters ( $\text{\AA}^2 \times 10^{-3}$ ) for compound **4**.

|        | x    | y    | z    | U(eq) |
|--------|------|------|------|-------|
| H(3)   | 5689 | 8614 | 6097 | 27    |
| H(4A)  | 6262 | 7434 | 6263 | 30    |
| H(4B)  | 5372 | 7201 | 6568 | 30    |
| H(5)   | 4905 | 5754 | 6093 | 27    |
| H(8)   | 6165 | 8933 | 5227 | 32    |
| H(11)  | 5215 | 5646 | 5220 | 29    |
| H(14A) | 6402 | 7856 | 3622 | 37    |
| H(14B) | 6465 | 6911 | 3674 | 37    |
| H(15)  | 7975 | 8752 | 3899 | 45    |
| H(16A) | 9425 | 8286 | 3737 | 114   |
| H(16B) | 9351 | 7834 | 4190 | 114   |
| H(16C) | 9314 | 8794 | 4144 | 114   |
| H(17A) | 8304 | 7714 | 2856 | 78    |
| H(17B) | 7222 | 7190 | 3007 | 78    |
| H(17C) | 7997 | 7086 | 3273 | 78    |
| H(1SC) | 2596 | 6333 | 4730 | 132   |
| H(1SD) | 2375 | 6925 | 4386 | 132   |
| H(1SA) | 3102 | 7343 | 4360 | 132   |
| H(1SB) | 2126 | 6463 | 4517 | 132   |

|        |      |      |      |     |
|--------|------|------|------|-----|
| H(2SA) | 8413 | 8278 | 4625 | 113 |
| H(2SB) | 8048 | 8066 | 5100 | 113 |

---



**Compound 5:** The single crystal X-ray diffraction studies were carried out on a Bruker Kappa Photon II CPAD diffractometer equipped with Mo  $K_{\alpha}$  radiation ( $\lambda = 0.71073 \text{ \AA}$ ). A 0.243 x 0.226 x 0.118 mm piece of a colorless block was mounted on a MiTeGen Micromount with CHRISTO-LUBE MCG 1024 oil. Data were collected in a nitrogen gas stream at 100(2) K using  $\phi$  and  $\omega$  scans. Crystal-to-detector distance was 60 mm using variable exposure time (2s-10s) depending on  $\theta$  with a scan width of  $1.0^{\circ}$ . Data collection was 99.8% complete to  $25.00^{\circ}$  in  $\theta$ . A total of 21428 reflections were collected covering the indices,  $-12 \leq h \leq 12$ ,  $-18 \leq k \leq 18$ ,  $-15 \leq l \leq 15$ . 3728 reflections were found to be symmetry independent, with a  $R_{\text{int}}$  of 0.0305. Indexing and unit cell refinement indicated a primitive, monoclinic lattice. The space group was found to be  $P2_1/m$ . The data were integrated using the Bruker SAINT software program and scaled using the SADABS software program. Solution by direct methods (SHELXT) produced a complete phasing model for refinement.

All nonhydrogen atoms were refined anisotropically by full-matrix least-squares (SHELXL-2014). All carbon bonded hydrogen atoms were placed using a riding model. Their positions were constrained relative to their parent atom using the appropriate HFIX command in SHELXL-2014. All other nitrogen bonded hydrogen atoms were located in the difference map. Their relative positions were restrained using DFIX commands and their thermals freely refined. Crystallographic data are summarized in Table 1.

● C  
● H  
● Cl  
● N  
● O

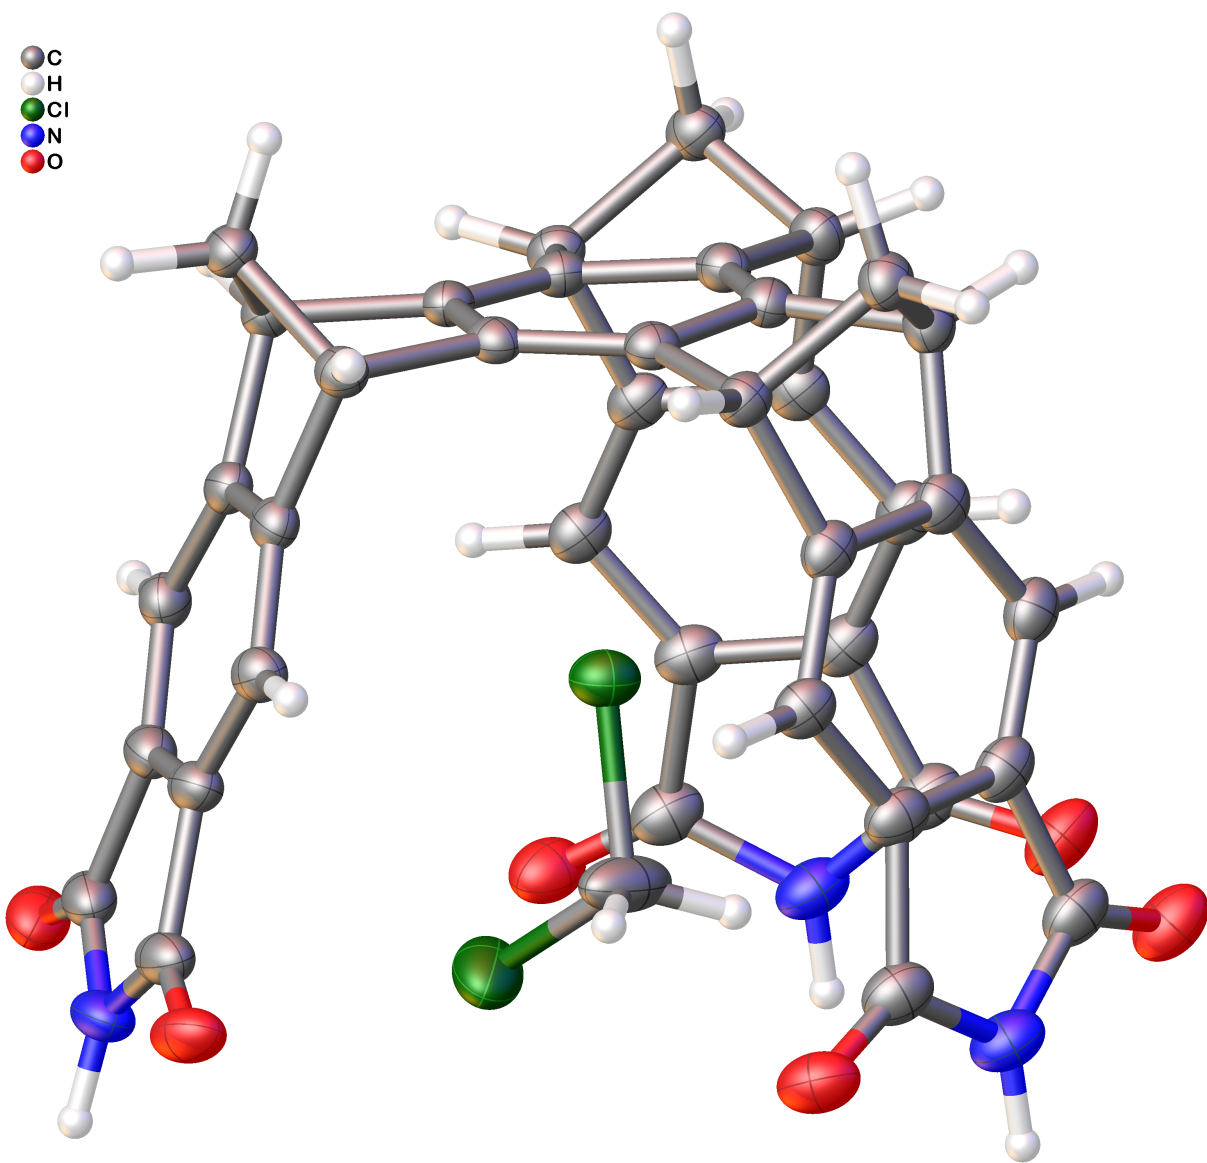

**Table 1.** Crystal data and structure refinement for compound **5**.

|                                 |                                                                                                                                   |
|---------------------------------|-----------------------------------------------------------------------------------------------------------------------------------|
| Report date                     | 2021-06-03                                                                                                                        |
| Identification code             | TrisNH                                                                                                                            |
| Empirical formula               | C41 H25 Cl4 N3 O6                                                                                                                 |
| Molecular formula               | C39 H21 N3 O6, 2(C H2 Cl2)                                                                                                        |
| Formula weight                  | 797.44                                                                                                                            |
| Temperature                     | 100.0 K                                                                                                                           |
| Wavelength                      | 0.71073 Å                                                                                                                         |
| Crystal system                  | Monoclinic                                                                                                                        |
| Space group                     | P 1 21/m 1                                                                                                                        |
| Unit cell dimensions            | a = 9.8486(7) Å $\alpha = 90^\circ$ .<br>b = 14.6173(10) Å $\beta = 102.991(3)^\circ$ .<br>c = 12.4874(9) Å $\gamma = 90^\circ$ . |
| Volume                          | 1751.7(2) Å <sup>3</sup>                                                                                                          |
| Z                               | 2                                                                                                                                 |
| Density (calculated)            | 1.512 Mg/m <sup>3</sup>                                                                                                           |
| Absorption coefficient          | 0.394 mm <sup>-1</sup>                                                                                                            |
| F(000)                          | 816                                                                                                                               |
| Crystal size                    | 0.243 x 0.226 x 0.118 mm <sup>3</sup>                                                                                             |
| Crystal color, habit            | Colorless Block                                                                                                                   |
| Theta range for data collection | 2.984 to 26.374°.                                                                                                                 |
| Index ranges                    | -12 ≤ h ≤ 12, -18 ≤ k ≤ 18, -15 ≤ l ≤ 15                                                                                          |
| Reflections collected           | 21428                                                                                                                             |
| Independent reflections         | 3728 [R(int) = 0.0305, R(sigma) = 0.0209]                                                                                         |
| Completeness to theta = 25.000° | 99.8 %                                                                                                                            |

|                                   |                                             |
|-----------------------------------|---------------------------------------------|
| Absorption correction             | Semi-empirical from equivalents             |
| Max. and min. transmission        | 0.0452 and 0.0251                           |
| Refinement method                 | Full-matrix least-squares on F <sup>2</sup> |
| Data / restraints / parameters    | 3728 / 2 / 285                              |
| Goodness-of-fit on F <sup>2</sup> | 1.027                                       |
| Final R indices [I>2sigma(I)]     | R1 = 0.0421, wR2 = 0.1094                   |
| R indices (all data)              | R1 = 0.0525, wR2 = 0.1172                   |
| Extinction coefficient            | n/a                                         |
| Largest diff. peak and hole       | 0.534 and -0.574 e.Å <sup>-3</sup>          |

**Table 2.** Atomic coordinates ( $\times 10^4$ ) and equivalent isotropic displacement parameters ( $\text{\AA}^2 \times 10^3$ )for compound **5**.  $U(\text{eq})$  is defined as one third of the trace of the orthogonalized  $U^{ij}$  tensor.

|       | x        | y       | z        | $U(\text{eq})$ |
|-------|----------|---------|----------|----------------|
| O(1)  | 5488(2)  | 4664(1) | 8628(1)  | 40(1)          |
| O(2)  | 8357(2)  | 6358(1) | 11286(1) | 40(1)          |
| O(3)  | 2631(2)  | 5932(1) | 4766(1)  | 38(1)          |
| N(1)  | 6712(2)  | 5464(1) | 10133(1) | 35(1)          |
| N(2)  | 2294(2)  | 7500    | 4808(2)  | 34(1)          |
| C(1)  | 10800(2) | 7034(1) | 7062(1)  | 23(1)          |
| C(2)  | 9923(2)  | 6541(1) | 6189(1)  | 22(1)          |
| C(3)  | 10029(2) | 5533(1) | 6535(1)  | 24(1)          |
| C(4)  | 11592(2) | 5510(1) | 7145(2)  | 26(1)          |
| C(5)  | 11472(2) | 6327(1) | 7913(2)  | 26(1)          |
| C(6)  | 10256(2) | 6001(1) | 8378(2)  | 26(1)          |
| C(7)  | 9360(2)  | 5505(1) | 7532(2)  | 25(1)          |
| C(8)  | 8108(2)  | 5152(1) | 7669(2)  | 27(1)          |
| C(9)  | 7781(2)  | 5332(1) | 8683(2)  | 29(1)          |
| C(10) | 8649(2)  | 5841(1) | 9492(2)  | 29(1)          |
| C(11) | 9917(2)  | 6187(1) | 9372(2)  | 28(1)          |
| C(12) | 6514(2)  | 5089(1) | 9092(2)  | 33(1)          |
| C(13) | 7962(2)  | 5947(1) | 10435(2) | 33(1)          |
| C(14) | 9159(2)  | 7012(1) | 5310(1)  | 22(1)          |
| C(15) | 8171(2)  | 6719(1) | 4237(1)  | 22(1)          |
| C(16) | 8467(3)  | 7500    | 3472(2)  | 24(1)          |

|        |         |         |         |       |
|--------|---------|---------|---------|-------|
| C(17)  | 6729(2) | 7016(1) | 4349(1) | 22(1) |
| C(18)  | 5577(2) | 6515(1) | 4463(1) | 25(1) |
| C(19)  | 4431(2) | 7026(1) | 4574(1) | 27(1) |
| C(20)  | 3046(2) | 6707(2) | 4722(2) | 31(1) |
| CI(3S) | 7250(1) | 7500    | 7241(1) | 33(1) |
| CI(4S) | 4520(3) | 6969(2) | 7523(2) | 54(1) |
| C(2S)  | 5874(8) | 7776(6) | 7850(8) | 54(3) |
| CI(1S) | 7439(1) | 2500    | 8226(1) | 65(1) |
| CI(2S) | 5587(1) | 2500    | 9764(1) | 61(1) |
| C(1S)  | 5685(4) | 2500    | 8366(3) | 54(1) |
| CI(3B) | 5013(2) | 6511(1) | 7300(2) | 44(1) |
| C(2SB) | 6035(9) | 7500    | 7297(8) | 40(2) |

---

**Table 3.** Bond lengths [Å] and angles [°] for compound **5**.

---

|              |           |                |          |
|--------------|-----------|----------------|----------|
| O(1)-C(12)   | 1.217(3)  | C(6)-C(11)     | 1.383(3) |
| O(2)-C(13)   | 1.206(3)  | C(7)-C(8)      | 1.383(3) |
| O(3)-C(20)   | 1.211(3)  | C(8)-H(8)      | 0.9500   |
| N(1)-H(1)    | 0.915(17) | C(8)-C(9)      | 1.400(3) |
| N(1)-C(12)   | 1.384(3)  | C(9)-C(10)     | 1.384(3) |
| N(1)-C(13)   | 1.395(3)  | C(9)-C(12)     | 1.494(3) |
| N(2)-H(2)    | 0.927(19) | C(10)-C(11)    | 1.386(3) |
| N(2)-C(20)   | 1.392(3)  | C(10)-C(13)    | 1.492(3) |
| N(2)-C(20)#1 | 1.392(3)  | C(11)-H(11)    | 0.9500   |
| C(1)-C(1)#1  | 1.361(4)  | C(14)-C(14)#1  | 1.428(4) |
| C(1)-C(2)    | 1.425(2)  | C(14)-C(15)    | 1.529(2) |
| C(1)-C(5)    | 1.523(2)  | C(15)-H(15)    | 1.0000   |
| C(2)-C(3)    | 1.533(2)  | C(15)-C(16)    | 1.558(2) |
| C(2)-C(14)   | 1.369(2)  | C(15)-C(17)    | 1.521(2) |
| C(3)-H(3)    | 1.0000    | C(16)-H(16A)   | 0.9900   |
| C(3)-C(4)    | 1.558(3)  | C(16)-H(16B)   | 0.9900   |
| C(3)-C(7)    | 1.534(2)  | C(17)-C(17)#1  | 1.416(4) |
| C(4)-H(4A)   | 0.9900    | C(17)-C(18)    | 1.384(3) |
| C(4)-H(4B)   | 0.9900    | C(18)-H(18)    | 0.9500   |
| C(4)-C(5)    | 1.553(3)  | C(18)-C(19)    | 1.386(3) |
| C(5)-H(5)    | 1.0000    | C(19)-C(19)#1  | 1.385(4) |
| C(5)-C(6)    | 1.520(3)  | C(19)-C(20)    | 1.491(3) |
| C(6)-C(7)    | 1.414(3)  | Cl(3S)-C(2S)#1 | 1.744(8) |

|                    |            |                  |            |
|--------------------|------------|------------------|------------|
| Cl(3S)-C(2S)       | 1.744(8)   | C(14)-C(2)-C(1)  | 119.24(17) |
| Cl(4S)-Cl(4S)#1    | 1.551(7)   | C(14)-C(2)-C(3)  | 134.38(17) |
| Cl(4S)-C(2S)#1     | 1.356(9)   | C(2)-C(3)-H(3)   | 117.3      |
| Cl(4S)-C(2S)       | 1.758(8)   | C(2)-C(3)-C(4)   | 98.95(15)  |
| Cl(4S)-H(2SA)#1    | 1.092(8)   | C(2)-C(3)-C(7)   | 103.82(14) |
| C(2S)-H(2SA)       | 0.9900     | C(4)-C(3)-H(3)   | 117.3      |
| C(2S)-H(2SB)       | 0.9900     | C(7)-C(3)-H(3)   | 117.3      |
| Cl(1S)-C(1S)       | 1.775(5)   | C(7)-C(3)-C(4)   | 99.16(14)  |
| Cl(2S)-C(1S)       | 1.769(4)   | C(3)-C(4)-H(4A)  | 112.8      |
| C(1S)-H(1SA)       | 0.9900     | C(3)-C(4)-H(4B)  | 112.8      |
| C(1S)-H(1SB)       | 0.9900     | H(4A)-C(4)-H(4B) | 110.2      |
| Cl(3B)-C(2SB)      | 1.763(6)   | C(5)-C(4)-C(3)   | 94.68(14)  |
| C(2SB)-H(2SC)      | 0.9900     | C(5)-C(4)-H(4A)  | 112.8      |
| C(2SB)-H(2SD)      | 0.9900     | C(5)-C(4)-H(4B)  | 112.8      |
|                    |            | C(1)-C(5)-C(4)   | 99.94(14)  |
| C(12)-N(1)-H(1)    | 122.5(19)  | C(1)-C(5)-H(5)   | 117.1      |
| C(12)-N(1)-C(13)   | 112.60(17) | C(4)-C(5)-H(5)   | 117.1      |
| C(13)-N(1)-H(1)    | 124.5(19)  | C(6)-C(5)-C(1)   | 102.90(14) |
| C(20)#1-N(2)-H(2)  | 123.67(12) | C(6)-C(5)-C(4)   | 99.79(15)  |
| C(20)-N(2)-H(2)    | 123.67(12) | C(6)-C(5)-H(5)   | 117.1      |
| C(20)-N(2)-C(20)#1 | 112.6(2)   | C(7)-C(6)-C(5)   | 106.76(16) |
| C(1)#1-C(1)-C(2)   | 120.41(10) | C(11)-C(6)-C(5)  | 130.56(18) |
| C(1)#1-C(1)-C(5)   | 132.73(10) | C(11)-C(6)-C(7)  | 122.40(18) |
| C(2)-C(1)-C(5)     | 106.49(15) | C(6)-C(7)-C(3)   | 106.49(16) |
| C(1)-C(2)-C(3)     | 106.29(15) | C(8)-C(7)-C(3)   | 131.85(17) |



|                     |            |                          |            |
|---------------------|------------|--------------------------|------------|
| C(8)-C(7)-C(6)      | 121.52(17) | C(17)-C(15)-C(14)        | 105.28(14) |
| C(7)-C(8)-H(8)      | 122.1      | C(17)-C(15)-H(15)        | 116.8      |
| C(7)-C(8)-C(9)      | 115.75(18) | C(17)-C(15)-C(16)        | 98.89(15)  |
| C(9)-C(8)-H(8)      | 122.1      | C(15)#1-C(16)-C(15)      | 94.24(19)  |
| C(8)-C(9)-C(12)     | 130.09(19) | C(15)#1-C(16)-H(16A)     | 112.9      |
| C(10)-C(9)-C(8)     | 122.09(18) | C(15)-C(16)-H(16A)       | 112.9      |
| C(10)-C(9)-C(12)    | 107.77(17) | C(15)#1-C(16)-H(16B)     | 112.9      |
| C(9)-C(10)-C(11)    | 122.76(18) | C(15)-C(16)-H(16B)       | 112.9      |
| C(9)-C(10)-C(13)    | 108.45(18) | H(16A)-C(16)-H(16B)      | 110.3      |
| C(11)-C(10)-C(13)   | 128.78(18) | C(17)#1-C(17)-C(15)      | 106.58(10) |
| C(6)-C(11)-C(10)    | 115.45(18) | C(18)-C(17)-C(15)        | 131.49(17) |
| C(6)-C(11)-H(11)    | 122.3      | C(18)-C(17)-C(17)#1      | 121.91(11) |
| C(10)-C(11)-H(11)   | 122.3      | C(17)-C(18)-H(18)        | 122.3      |
| O(1)-C(12)-N(1)     | 125.25(19) | C(17)-C(18)-C(19)        | 115.48(18) |
| O(1)-C(12)-C(9)     | 128.84(19) | C(19)-C(18)-H(18)        | 122.3      |
| N(1)-C(12)-C(9)     | 105.90(18) | C(18)-C(19)-C(20)        | 129.17(19) |
| O(2)-C(13)-N(1)     | 125.44(19) | C(19)#1-C(19)-C(18)      | 122.61(11) |
| O(2)-C(13)-C(10)    | 129.3(2)   | C(19)#1-C(19)-C(20)      | 108.22(12) |
| N(1)-C(13)-C(10)    | 105.25(17) | O(3)-C(20)-N(2)          | 125.79(18) |
| C(2)-C(14)-C(14)#1  | 120.17(11) | O(3)-C(20)-C(19)         | 128.8(2)   |
| C(2)-C(14)-C(15)    | 133.53(17) | N(2)-C(20)-C(19)         | 105.46(18) |
| C(14)#1-C(14)-C(15) | 106.26(10) | C(2S)#1-Cl(3S)-C(2S)     | 26.7(5)    |
| C(14)-C(15)-H(15)   | 116.8      | Cl(4S)#1-Cl(4S)-C(2S)    | 47.9(3)    |
| C(14)-C(15)-C(16)   | 99.33(15)  | Cl(4S)#1-Cl(4S)-H(2SA)#1 | 118.6(5)   |
| C(16)-C(15)-H(15)   | 116.8      | C(2S)#1-Cl(4S)-Cl(4S)#1  | 74.0(4)    |

|                         |            |
|-------------------------|------------|
| C(2S)#1-Cl(4S)-C(2S)    | 26.2(6)    |
| C(2S)-Cl(4S)-H(2SA)#1   | 71.6(8)    |
| C(2S)#1-Cl(4S)-H(2SA)#1 | 46.2(3)    |
| Cl(3S)-C(2S)-Cl(4S)     | 111.5(5)   |
| Cl(3S)-C(2S)-H(2SA)     | 109.3      |
| Cl(3S)-C(2S)-H(2SB)     | 109.3      |
| Cl(4S)-C(2S)-H(2SA)     | 109.3      |
| Cl(4S)-C(2S)-H(2SB)     | 109.3      |
| H(2SA)-C(2S)-H(2SB)     | 108.0      |
| Cl(1S)-C(1S)-H(1SA)     | 109.3      |
| Cl(1S)-C(1S)-H(1SB)     | 109.3      |
| Cl(2S)-C(1S)-Cl(1S)     | 111.56(19) |
| Cl(2S)-C(1S)-H(1SA)     | 109.3      |
| Cl(2S)-C(1S)-H(1SB)     | 109.3      |
| H(1SA)-C(1S)-H(1SB)     | 108.0      |
| Cl(3B)#1-C(2SB)-Cl(3B)  | 110.2(5)   |
| Cl(3B)#1-C(2SB)-H(2SC)  | 109.6      |
| Cl(3B)-C(2SB)-H(2SC)    | 109.6      |
| Cl(3B)#1-C(2SB)-H(2SD)  | 109.6      |
| Cl(3B)-C(2SB)-H(2SD)    | 109.6      |
| H(2SC)-C(2SB)-H(2SD)    | 108.1      |

---

Symmetry transformations used to generate equivalent atoms:

#1  $x, -y+3/2, z$

**Table 4.** Anisotropic displacement parameters ( $\text{\AA}^2 \times 10^3$ ) for compound **5**. The anisotropic displacement factor exponent takes the form:  $-2\pi^2 [ h^2 a^{*2} U^{11} + \dots + 2 h k a^* b^* U^{12} ]$

|       | U <sup>11</sup> | U <sup>22</sup> | U <sup>33</sup> | U <sup>23</sup> | U <sup>13</sup> | U <sup>12</sup> |
|-------|-----------------|-----------------|-----------------|-----------------|-----------------|-----------------|
| O(1)  | 43(1)           | 38(1)           | 43(1)           | -5(1)           | 20(1)           | -8(1)           |
| O(2)  | 60(1)           | 33(1)           | 31(1)           | -3(1)           | 18(1)           | -1(1)           |
| O(3)  | 31(1)           | 49(1)           | 35(1)           | -7(1)           | 12(1)           | -14(1)          |
| N(1)  | 43(1)           | 35(1)           | 33(1)           | -1(1)           | 19(1)           | -1(1)           |
| N(2)  | 20(1)           | 52(2)           | 32(1)           | 0               | 8(1)            | 0               |
| C(1)  | 20(1)           | 27(1)           | 22(1)           | 1(1)            | 6(1)            | 2(1)            |
| C(2)  | 20(1)           | 23(1)           | 23(1)           | -1(1)           | 8(1)            | 1(1)            |
| C(3)  | 26(1)           | 23(1)           | 23(1)           | 1(1)            | 7(1)            | 3(1)            |
| C(4)  | 27(1)           | 28(1)           | 24(1)           | 2(1)            | 6(1)            | 5(1)            |
| C(5)  | 26(1)           | 27(1)           | 24(1)           | 1(1)            | 3(1)            | 4(1)            |
| C(6)  | 29(1)           | 21(1)           | 26(1)           | 4(1)            | 6(1)            | 5(1)            |
| C(7)  | 31(1)           | 21(1)           | 24(1)           | 3(1)            | 8(1)            | 5(1)            |
| C(8)  | 33(1)           | 21(1)           | 28(1)           | 1(1)            | 9(1)            | 0(1)            |
| C(9)  | 35(1)           | 24(1)           | 31(1)           | 4(1)            | 13(1)           | 3(1)            |
| C(10) | 40(1)           | 22(1)           | 26(1)           | 3(1)            | 10(1)           | 5(1)            |
| C(11) | 35(1)           | 24(1)           | 24(1)           | 2(1)            | 6(1)            | 5(1)            |
| C(12) | 41(1)           | 27(1)           | 35(1)           | 2(1)            | 16(1)           | 1(1)            |
| C(13) | 45(1)           | 26(1)           | 30(1)           | 5(1)            | 14(1)           | 4(1)            |
| C(14) | 19(1)           | 26(1)           | 22(1)           | -2(1)           | 7(1)            | 0(1)            |
| C(15) | 21(1)           | 24(1)           | 21(1)           | -2(1)           | 5(1)            | 0(1)            |
| C(16) | 24(1)           | 30(1)           | 21(1)           | 0               | 6(1)            | 0               |

|        |       |       |       |        |        |        |
|--------|-------|-------|-------|--------|--------|--------|
| C(17)  | 22(1) | 27(1) | 18(1) | -1(1)  | 4(1)   | 1(1)   |
| C(18)  | 24(1) | 28(1) | 23(1) | -2(1)  | 5(1)   | -4(1)  |
| C(19)  | 22(1) | 37(1) | 22(1) | -1(1)  | 5(1)   | -3(1)  |
| C(20)  | 24(1) | 47(1) | 23(1) | -2(1)  | 6(1)   | -5(1)  |
| Cl(3S) | 30(1) | 34(1) | 38(1) | 0      | 13(1)  | 0      |
| Cl(4S) | 38(1) | 83(2) | 43(1) | -10(1) | 15(1)  | -24(1) |
| C(2S)  | 41(4) | 53(6) | 79(6) | -30(4) | 36(4)  | -16(3) |
| Cl(1S) | 72(1) | 66(1) | 45(1) | 0      | -12(1) | 0      |
| Cl(2S) | 77(1) | 53(1) | 42(1) | 0      | -10(1) | 0      |
| C(1S)  | 71(3) | 36(2) | 42(2) | 0      | -16(2) | 0      |
| Cl(3B) | 40(1) | 48(1) | 41(1) | 11(1)  | 6(1)   | -2(1)  |
| C(2SB) | 32(5) | 50(6) | 35(5) | 0      | 2(4)   | 0      |

---

**Table 5.** Hydrogen coordinates ( $\times 10^4$ ) and isotropic displacement parameters ( $\text{\AA}^2 \times 10^{-3}$ )for compound **5**.

|        | x        | y        | z         | U(eq)  |
|--------|----------|----------|-----------|--------|
| H(1)   | 6040(20) | 5450(20) | 10530(20) | 64(9)  |
| H(2)   | 1400(20) | 7500     | 4920(30)  | 55(11) |
| H(3)   | 9709     | 5067     | 5946      | 29     |
| H(4A)  | 11858    | 4932     | 7552      | 32     |
| H(4B)  | 12230    | 5636     | 6653      | 32     |
| H(5)   | 12339    | 6515     | 8453      | 31     |
| H(8)   | 7507     | 4810     | 7110      | 32     |
| H(11)  | 10512    | 6530     | 9935      | 34     |
| H(15)  | 8266     | 6077     | 3986      | 26     |
| H(16A) | 9441     | 7500     | 3382      | 29     |
| H(16B) | 7810     | 7500     | 2745      | 29     |
| H(18)  | 5572     | 5865     | 4465      | 30     |
| H(2SA) | 5510     | 8388     | 7596      | 65     |
| H(2SB) | 6219     | 7801     | 8658      | 65     |
| H(1SA) | 5202     | 3048     | 7998      | 65     |
| H(1SB) | 5202     | 1952     | 7998      | 65     |
| H(2SC) | 6815     | 7500     | 7954      | 48     |
| H(2SD) | 6435     | 7500     | 6637      | 48     |

Table 6. Hydrogen bonds for Badjic\_TrishNH [ $\text{\AA}$  and  $^\circ$ ].

| D-H...A            | d(D-H)    | d(H...A)  | d(D...A) | $\angle(\text{DHA})$ |
|--------------------|-----------|-----------|----------|----------------------|
| N(1)-H(1)...O(1)#2 | 0.915(17) | 2.025(18) | 2.938(2) | 176(3)               |

Symmetry transformations used to generate equivalent atoms:

#1  $x, -y+3/2, z$  #2  $-x+1, -y+1, -z+2$

**Capsularene 1:** The single crystal X-ray diffraction studies were carried out on a Bruker Kappa Photon II CPAD diffractometer equipped with Mo K $\alpha$  radiation ( $\lambda = 0.71073 \text{ \AA}$ ). A 0.273 x 0.256 x 0.189 mm piece of a colorless plate was mounted on a MiTeGen Micromount with CHRISTO-LUBE MCG 1024 oil. Data were collected in a nitrogen gas stream at 100(2) K using  $\phi$  and  $\omega$  scans. Crystal-to-detector distance was 60 mm using variable exposure time (2s-10s) depending on  $\theta$  with a scan width of 0.75°. Data collection was 99.7% complete to 25.00° in  $\theta$ . A total of 104884 reflections were collected covering the indices,  $-16 \leq h \leq 16$ ,  $-18 \leq k \leq 18$ ,  $-34 \leq l \leq 34$ . 10576 reflections were found to be symmetry independent, with a  $R_{\text{int}}$  of 0.0304. Indexing and unit cell refinement indicated a primitive, monoclinic lattice. The space group was found to be  $P2_1/c$ . The data were integrated using the Bruker SAINT software program and scaled using the SADABS software program. Solution by direct methods (SHELXT) produced a complete phasing model consistent with the proposed structure.

All nonhydrogen atoms were refined anisotropically by full-matrix least-squares (SHELXL-2014). All hydrogen atoms were placed using a riding model. Their positions were constrained relative to their parent atom using the appropriate HFIX command in SHELXL-2014. Crystallographic data are summarized in Table 1.



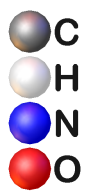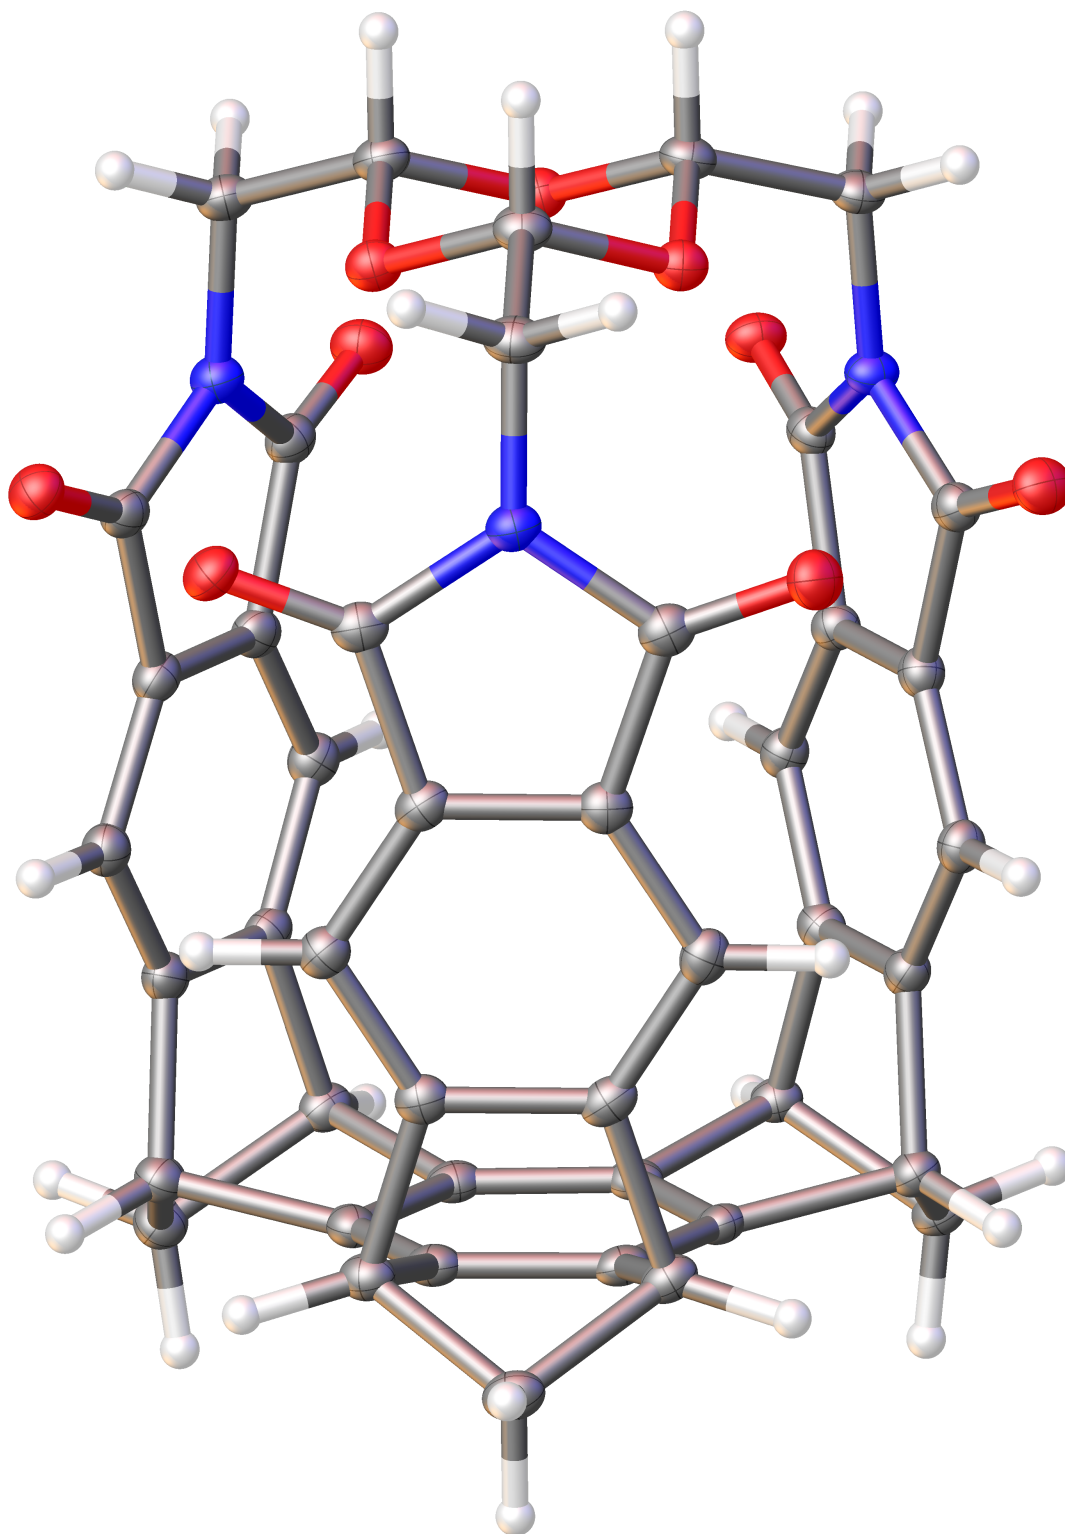

**Table 1.** Crystal data and structure refinement for capsularene **1**.

|                                 |                                                                                                            |
|---------------------------------|------------------------------------------------------------------------------------------------------------|
| Report date                     | 2019-08-07                                                                                                 |
| Identification code             | LZQ-8-38                                                                                                   |
| Empirical formula               | C <sub>48</sub> H <sub>33</sub> Cl <sub>6</sub> N <sub>3</sub> O <sub>9</sub>                              |
| Molecular formula               | C <sub>45</sub> H <sub>27</sub> N <sub>3</sub> O <sub>9</sub> , 3(C H <sub>2</sub> Cl <sub>2</sub> )       |
| Formula weight                  | 1008.47                                                                                                    |
| Temperature                     | 100 K                                                                                                      |
| Wavelength                      | 0.71073 Å                                                                                                  |
| Crystal system                  | Monoclinic                                                                                                 |
| Space group                     | P 1 21/c 1                                                                                                 |
| Unit cell dimensions            | a = 12.1863(9) Å      α = 90°.<br>b = 13.6712(9) Å      β = 90.471(3)°.<br>c = 25.6177(18) Å      γ = 90°. |
| Volume                          | 4267.8(5) Å <sup>3</sup>                                                                                   |
| Z                               | 4                                                                                                          |
| Density (calculated)            | 1.570 Mg/m <sup>3</sup>                                                                                    |
| Absorption coefficient          | 0.468 mm <sup>-1</sup>                                                                                     |
| F(000)                          | 2064                                                                                                       |
| Crystal size                    | 0.273 x 0.256 x 0.189 mm <sup>3</sup>                                                                      |
| Crystal color, habit            | Colorless Block                                                                                            |
| Theta range for data collection | 2.902 to 28.285°.                                                                                          |
| Index ranges                    | -16 ≤ h ≤ 16, -18 ≤ k ≤ 18, -34 ≤ l ≤ 34                                                                   |
| Reflections collected           | 104884                                                                                                     |
| Independent reflections         | 10576 [R(int) = 0.0304, R(sigma) = 0.0154]                                                                 |

|                                   |                                             |
|-----------------------------------|---------------------------------------------|
| Completeness to theta = 25.000°   | 99.7 %                                      |
| Absorption correction             | Semi-empirical from equivalents             |
| Max. and min. transmission        | 0.0962 and 0.0679                           |
| Refinement method                 | Full-matrix least-squares on F <sup>2</sup> |
| Data / restraints / parameters    | 10576 / 27 / 642                            |
| Goodness-of-fit on F <sup>2</sup> | 1.061                                       |
| Final R indices [I>2sigma(I)]     | R1 = 0.0363, wR2 = 0.0858                   |
| R indices (all data)              | R1 = 0.0403, wR2 = 0.0887                   |
| Extinction coefficient            | n/a                                         |
| Largest diff. peak and hole       | 0.393 and -0.265 e.Å <sup>-3</sup>          |

**Table 2.** Atomic coordinates ( $\times 10^4$ ) and equivalent isotropic displacement parameters ( $\text{\AA}^2 \times 10^3$ )for capsularene **1**.  $U(\text{eq})$  is defined as one third of the trace of the orthogonalized  $U^{ij}$  tensor.

|      | x       | y       | z       | $U(\text{eq})$ |
|------|---------|---------|---------|----------------|
| O(1) | 1627(1) | 2323(1) | 5836(1) | 17(1)          |
| O(2) | 1679(1) | 1532(1) | 6639(1) | 16(1)          |
| O(3) | 1610(1) | 3223(1) | 6605(1) | 16(1)          |
| O(4) | 3027(1) | 5200(1) | 6490(1) | 20(1)          |
| O(5) | 3077(1) | 3411(1) | 4982(1) | 19(1)          |
| O(6) | 3088(1) | 1233(1) | 5007(1) | 19(1)          |
| O(7) | 3239(1) | -309(1) | 6591(1) | 21(1)          |
| O(8) | 3228(1) | 860(1)  | 7625(1) | 20(1)          |
| O(9) | 3040(1) | 4189(1) | 7525(1) | 18(1)          |
| N(1) | 2778(1) | 4190(1) | 5771(1) | 17(1)          |
| N(2) | 2875(1) | 540(1)  | 5826(1) | 17(1)          |
| N(3) | 2849(1) | 2501(1) | 7485(1) | 16(1)          |
| C(1) | 1597(1) | 4081(1) | 5789(1) | 18(1)          |
| C(2) | 1223(1) | 3179(1) | 6082(1) | 17(1)          |
| C(3) | 1691(1) | 570(1)  | 5856(1) | 18(1)          |
| C(4) | 1276(1) | 1490(1) | 6119(1) | 17(1)          |
| C(5) | 1666(1) | 2439(1) | 7443(1) | 16(1)          |
| C(6) | 1263(1) | 2379(1) | 6882(1) | 16(1)          |
| C(7) | 3400(1) | 4728(1) | 6134(1) | 16(1)          |
| C(8) | 4564(1) | 4607(1) | 5972(1) | 16(1)          |

|       |         |         |         |       |
|-------|---------|---------|---------|-------|
| C(9)  | 4580(1) | 4067(1) | 5513(1) | 16(1) |
| C(10) | 3428(1) | 3818(1) | 5366(1) | 16(1) |
| C(11) | 5524(1) | 4920(1) | 6222(1) | 16(1) |
| C(12) | 6493(1) | 4641(1) | 5985(1) | 16(1) |
| C(13) | 6505(1) | 4097(1) | 5516(1) | 16(1) |
| C(14) | 5547(1) | 3805(1) | 5266(1) | 17(1) |
| C(15) | 7685(1) | 4717(1) | 6174(1) | 16(1) |
| C(16) | 8271(1) | 4768(1) | 5638(1) | 18(1) |
| C(17) | 7706(1) | 3837(1) | 5413(1) | 16(1) |
| C(18) | 7955(1) | 3661(1) | 6325(1) | 15(1) |
| C(19) | 7965(1) | 3111(1) | 5852(1) | 15(1) |
| C(20) | 3479(1) | 922(1)  | 5409(1) | 16(1) |
| C(21) | 4653(1) | 834(1)  | 5571(1) | 16(1) |
| C(22) | 4695(1) | 362(1)  | 6050(1) | 16(1) |
| C(23) | 3555(1) | 137(1)  | 6214(1) | 17(1) |
| C(24) | 5591(1) | 1164(1) | 5317(1) | 16(1) |
| C(25) | 6573(1) | 1003(1) | 5580(1) | 16(1) |
| C(26) | 6615(1) | 518(1)  | 6068(1) | 16(1) |
| C(27) | 5684(1) | 181(1)  | 6312(1) | 16(1) |
| C(28) | 7748(1) | 1319(1) | 5459(1) | 16(1) |
| C(29) | 8373(1) | 441(1)  | 5707(1) | 18(1) |
| C(30) | 7812(1) | 535(1)  | 6249(1) | 16(1) |
| C(31) | 7984(1) | 2109(1) | 5870(1) | 15(1) |
| C(32) | 8018(1) | 1619(1) | 6361(1) | 15(1) |
| C(33) | 3535(1) | 1687(1) | 7545(1) | 15(1) |

|        |          |          |          |       |
|--------|----------|----------|----------|-------|
| C(34)  | 4675(1)  | 2072(1)  | 7509(1)  | 15(1) |
| C(35)  | 4618(1)  | 3088(1)  | 7484(1)  | 14(1) |
| C(36)  | 3439(1)  | 3382(1)  | 7496(1)  | 15(1) |
| C(37)  | 5664(1)  | 1564(1)  | 7495(1)  | 16(1) |
| C(38)  | 6591(1)  | 2142(1)  | 7447(1)  | 15(1) |
| C(39)  | 6539(1)  | 3173(1)  | 7426(1)  | 14(1) |
| C(40)  | 5551(1)  | 3672(1)  | 7447(1)  | 15(1) |
| C(41)  | 7793(1)  | 1862(1)  | 7382(1)  | 15(1) |
| C(42)  | 8336(1)  | 2742(1)  | 7671(1)  | 17(1) |
| C(43)  | 7711(1)  | 3537(1)  | 7350(1)  | 14(1) |
| C(44)  | 8014(1)  | 2148(1)  | 6815(1)  | 14(1) |
| C(45)  | 7971(1)  | 3190(1)  | 6797(1)  | 15(1) |
| Cl(5B) | 9148(11) | 8134(10) | 6218(4)  | 57(3) |
| Cl(5C) | 8400(14) | 7874(10) | 6209(5)  | 72(3) |
| Cl(5S) | 9325(3)  | 8245(3)  | 6199(1)  | 35(1) |
| Cl(6B) | 10043(5) | 7540(5)  | 5218(3)  | 56(2) |
| Cl(6C) | 10070(7) | 8183(8)  | 5369(6)  | 65(3) |
| Cl(6S) | 10031(2) | 7152(1)  | 5283(1)  | 44(1) |
| C(3S)  | 8891(2)  | 7554(2)  | 5638(1)  | 31(1) |
| Cl(1S) | 9847(1)  | 4062(1)  | 3312(1)  | 27(1) |
| Cl(2S) | 10014(1) | 4889(1)  | 2260(1)  | 27(1) |
| C(1S)  | 9583(2)  | 5092(1)  | 2910(1)  | 26(1) |
| Cl(3B) | 3196(14) | 2384(12) | 3666(6)  | 31(1) |
| Cl(4B) | 5542(17) | 2469(15) | 3883(8)  | 33(1) |
| C(2SB) | 4350(20) | 1770(30) | 3920(20) | 25(1) |

|        |         |         |         |       |
|--------|---------|---------|---------|-------|
| Cl(3S) | 4688(1) | 2433(1) | 4030(1) | 31(1) |
| Cl(4S) | 7080(1) | 2411(1) | 4163(1) | 33(1) |
| C(2S)  | 5969(2) | 2535(1) | 3715(1) | 25(1) |

---

**Table 3.** Bond lengths [Å] and angles [°] for capsularene **1**.

---

|            |            |             |          |
|------------|------------|-------------|----------|
| O(1)-C(2)  | 1.4179(18) | C(1)-C(2)   | 1.515(2) |
| O(1)-C(4)  | 1.4191(19) | C(2)-H(2)   | 1.0000   |
| O(2)-C(4)  | 1.4162(19) | C(3)-H(3A)  | 0.9900   |
| O(2)-C(6)  | 1.4120(18) | C(3)-H(3B)  | 0.9900   |
| O(3)-C(2)  | 1.4182(18) | C(3)-C(4)   | 1.516(2) |
| O(3)-C(6)  | 1.4213(19) | C(4)-H(4)   | 1.0000   |
| O(4)-C(7)  | 1.209(2)   | C(5)-H(5A)  | 0.9900   |
| O(5)-C(10) | 1.2053(19) | C(5)-H(5B)  | 0.9900   |
| O(6)-C(20) | 1.2086(19) | C(5)-C(6)   | 1.518(2) |
| O(7)-C(23) | 1.208(2)   | C(6)-H(6)   | 1.0000   |
| O(8)-C(33) | 1.2082(19) | C(7)-C(8)   | 1.490(2) |
| O(9)-C(36) | 1.2080(19) | C(8)-C(9)   | 1.388(2) |
| N(1)-C(1)  | 1.448(2)   | C(8)-C(11)  | 1.397(2) |
| N(1)-C(7)  | 1.404(2)   | C(9)-C(10)  | 1.490(2) |
| N(1)-C(10) | 1.406(2)   | C(9)-C(14)  | 1.389(2) |
| N(2)-C(3)  | 1.446(2)   | C(11)-H(11) | 0.9500   |
| N(2)-C(20) | 1.402(2)   | C(11)-C(12) | 1.386(2) |
| N(2)-C(23) | 1.403(2)   | C(12)-C(13) | 1.414(2) |
| N(3)-C(5)  | 1.4470(19) | C(12)-C(15) | 1.530(2) |
| N(3)-C(33) | 1.401(2)   | C(13)-C(14) | 1.387(2) |
| N(3)-C(36) | 1.4027(19) | C(13)-C(17) | 1.531(2) |
| C(1)-H(1A) | 0.9900     | C(14)-H(14) | 0.9500   |
| C(1)-H(1B) | 0.9900     | C(15)-H(15) | 1.0000   |



|              |          |              |          |
|--------------|----------|--------------|----------|
| C(15)-C(16)  | 1.554(2) | C(29)-H(29A) | 0.9900   |
| C(15)-C(18)  | 1.530(2) | C(29)-H(29B) | 0.9900   |
| C(16)-H(16A) | 0.9900   | C(29)-C(30)  | 1.556(2) |
| C(16)-H(16B) | 0.9900   | C(30)-H(30)  | 1.0000   |
| C(16)-C(17)  | 1.555(2) | C(30)-C(32)  | 1.531(2) |
| C(17)-H(17)  | 1.0000   | C(31)-C(32)  | 1.426(2) |
| C(17)-C(19)  | 1.531(2) | C(32)-C(44)  | 1.369(2) |
| C(18)-C(19)  | 1.428(2) | C(33)-C(34)  | 1.489(2) |
| C(18)-C(45)  | 1.369(2) | C(34)-C(35)  | 1.392(2) |
| C(19)-C(31)  | 1.370(2) | C(34)-C(37)  | 1.391(2) |
| C(20)-C(21)  | 1.490(2) | C(35)-C(36)  | 1.493(2) |
| C(21)-C(22)  | 1.388(2) | C(35)-C(40)  | 1.393(2) |
| C(21)-C(24)  | 1.395(2) | C(37)-H(37)  | 0.9500   |
| C(22)-C(23)  | 1.487(2) | C(37)-C(38)  | 1.385(2) |
| C(22)-C(27)  | 1.398(2) | C(38)-C(39)  | 1.412(2) |
| C(24)-H(24)  | 0.9500   | C(38)-C(41)  | 1.524(2) |
| C(24)-C(25)  | 1.386(2) | C(39)-C(40)  | 1.386(2) |
| C(25)-C(26)  | 1.414(2) | C(39)-C(43)  | 1.526(2) |
| C(25)-C(28)  | 1.530(2) | C(40)-H(40)  | 0.9500   |
| C(26)-C(27)  | 1.379(2) | C(41)-H(41)  | 1.0000   |
| C(26)-C(30)  | 1.527(2) | C(41)-C(42)  | 1.558(2) |
| C(27)-H(27)  | 0.9500   | C(41)-C(44)  | 1.531(2) |
| C(28)-H(28)  | 1.0000   | C(42)-H(42A) | 0.9900   |
| C(28)-C(29)  | 1.555(2) | C(42)-H(42B) | 0.9900   |
| C(28)-C(31)  | 1.533(2) | C(42)-C(43)  | 1.557(2) |

|               |            |                  |            |
|---------------|------------|------------------|------------|
| C(43)-H(43)   | 1.0000     | C(2S)-H(2SC)     | 0.9900     |
| C(43)-C(45)   | 1.531(2)   | C(2S)-H(2SD)     | 0.9900     |
| C(44)-C(45)   | 1.426(2)   |                  |            |
| Cl(5B)-C(3S)  | 1.710(9)   | C(2)-O(1)-C(4)   | 109.19(12) |
| Cl(5C)-C(3S)  | 1.643(11)  | C(6)-O(2)-C(4)   | 108.93(12) |
| Cl(5S)-C(3S)  | 1.796(4)   | C(2)-O(3)-C(6)   | 109.81(12) |
| Cl(6B)-C(3S)  | 1.775(6)   | C(7)-N(1)-C(1)   | 124.37(13) |
| Cl(6C)-C(3S)  | 1.815(9)   | C(7)-N(1)-C(10)  | 111.99(13) |
| Cl(6S)-C(3S)  | 1.755(3)   | C(10)-N(1)-C(1)  | 123.52(13) |
| C(3S)-H(3SA)  | 0.9900     | C(20)-N(2)-C(3)  | 124.16(13) |
| C(3S)-H(3SB)  | 0.9900     | C(20)-N(2)-C(23) | 112.05(13) |
| C(3S)-H(3SC)  | 0.9900     | C(23)-N(2)-C(3)  | 123.79(14) |
| C(3S)-H(3SD)  | 0.9900     | C(33)-N(3)-C(5)  | 123.71(13) |
| C(3S)-H(3SE)  | 0.9900     | C(33)-N(3)-C(36) | 111.97(13) |
| C(3S)-H(3SF)  | 0.9900     | C(36)-N(3)-C(5)  | 124.25(13) |
| Cl(1S)-C(1S)  | 1.773(2)   | N(1)-C(1)-H(1A)  | 108.8      |
| Cl(2S)-C(1S)  | 1.7721(19) | N(1)-C(1)-H(1B)  | 108.8      |
| C(1S)-H(1SA)  | 0.9900     | N(1)-C(1)-C(2)   | 113.74(13) |
| C(1S)-H(1SB)  | 0.9900     | H(1A)-C(1)-H(1B) | 107.7      |
| Cl(3B)-C(2SB) | 1.75(2)    | C(2)-C(1)-H(1A)  | 108.8      |
| Cl(4B)-C(2SB) | 1.75(2)    | C(2)-C(1)-H(1B)  | 108.8      |
| C(2SB)-H(2SA) | 0.9900     | O(1)-C(2)-O(3)   | 109.88(12) |
| C(2SB)-H(2SB) | 0.9900     | O(1)-C(2)-C(1)   | 110.19(13) |
| Cl(3S)-C(2S)  | 1.769(2)   | O(1)-C(2)-H(2)   | 109.1      |
| Cl(4S)-C(2S)  | 1.776(2)   | O(3)-C(2)-C(1)   | 109.47(13) |

|                  |            |                   |            |
|------------------|------------|-------------------|------------|
| O(3)-C(2)-H(2)   | 109.1      | C(5)-C(6)-H(6)    | 109.1      |
| C(1)-C(2)-H(2)   | 109.1      | O(4)-C(7)-N(1)    | 125.11(15) |
| N(2)-C(3)-H(3A)  | 109.1      | O(4)-C(7)-C(8)    | 129.41(15) |
| N(2)-C(3)-H(3B)  | 109.1      | N(1)-C(7)-C(8)    | 105.45(13) |
| N(2)-C(3)-C(4)   | 112.62(13) | C(9)-C(8)-C(7)    | 108.42(13) |
| H(3A)-C(3)-H(3B) | 107.8      | C(9)-C(8)-C(11)   | 122.24(14) |
| C(4)-C(3)-H(3A)  | 109.1      | C(11)-C(8)-C(7)   | 129.29(14) |
| C(4)-C(3)-H(3B)  | 109.1      | C(8)-C(9)-C(10)   | 108.37(13) |
| O(1)-C(4)-C(3)   | 109.63(13) | C(8)-C(9)-C(14)   | 122.78(14) |
| O(1)-C(4)-H(4)   | 109.1      | C(14)-C(9)-C(10)  | 128.81(14) |
| O(2)-C(4)-O(1)   | 110.10(12) | O(5)-C(10)-N(1)   | 124.82(14) |
| O(2)-C(4)-C(3)   | 109.67(13) | O(5)-C(10)-C(9)   | 129.72(15) |
| O(2)-C(4)-H(4)   | 109.1      | N(1)-C(10)-C(9)   | 105.44(13) |
| C(3)-C(4)-H(4)   | 109.1      | C(8)-C(11)-H(11)  | 122.3      |
| N(3)-C(5)-H(5A)  | 109.0      | C(12)-C(11)-C(8)  | 115.40(14) |
| N(3)-C(5)-H(5B)  | 109.0      | C(12)-C(11)-H(11) | 122.3      |
| N(3)-C(5)-C(6)   | 112.81(13) | C(11)-C(12)-C(13) | 122.10(14) |
| H(5A)-C(5)-H(5B) | 107.8      | C(11)-C(12)-C(15) | 130.81(14) |
| C(6)-C(5)-H(5A)  | 109.0      | C(13)-C(12)-C(15) | 106.73(13) |
| C(6)-C(5)-H(5B)  | 109.0      | C(12)-C(13)-C(17) | 106.56(13) |
| O(2)-C(6)-O(3)   | 109.66(12) | C(14)-C(13)-C(12) | 122.04(14) |
| O(2)-C(6)-C(5)   | 110.30(13) | C(14)-C(13)-C(17) | 131.01(14) |
| O(2)-C(6)-H(6)   | 109.1      | C(9)-C(14)-H(14)  | 122.3      |
| O(3)-C(6)-C(5)   | 109.53(12) | C(13)-C(14)-C(9)  | 115.40(14) |
| O(3)-C(6)-H(6)   | 109.1      | C(13)-C(14)-H(14) | 122.3      |

|                     |            |                   |            |
|---------------------|------------|-------------------|------------|
| C(12)-C(15)-H(15)   | 117.3      | O(6)-C(20)-C(21)  | 129.51(15) |
| C(12)-C(15)-C(16)   | 99.57(12)  | N(2)-C(20)-C(21)  | 105.50(13) |
| C(12)-C(15)-C(18)   | 102.59(12) | C(22)-C(21)-C(20) | 108.19(14) |
| C(16)-C(15)-H(15)   | 117.3      | C(22)-C(21)-C(24) | 122.55(14) |
| C(18)-C(15)-H(15)   | 117.3      | C(24)-C(21)-C(20) | 129.25(14) |
| C(18)-C(15)-C(16)   | 99.60(12)  | C(21)-C(22)-C(23) | 108.54(13) |
| C(15)-C(16)-H(16A)  | 112.8      | C(21)-C(22)-C(27) | 122.26(14) |
| C(15)-C(16)-H(16B)  | 112.8      | C(27)-C(22)-C(23) | 129.19(14) |
| C(15)-C(16)-C(17)   | 94.86(12)  | O(7)-C(23)-N(2)   | 125.13(15) |
| H(16A)-C(16)-H(16B) | 110.2      | O(7)-C(23)-C(22)  | 129.41(15) |
| C(17)-C(16)-H(16A)  | 112.8      | N(2)-C(23)-C(22)  | 105.44(13) |
| C(17)-C(16)-H(16B)  | 112.8      | C(21)-C(24)-H(24) | 122.3      |
| C(13)-C(17)-C(16)   | 99.61(12)  | C(25)-C(24)-C(21) | 115.43(14) |
| C(13)-C(17)-H(17)   | 117.3      | C(25)-C(24)-H(24) | 122.3      |
| C(16)-C(17)-H(17)   | 117.3      | C(24)-C(25)-C(26) | 121.89(14) |
| C(19)-C(17)-C(13)   | 102.46(12) | C(24)-C(25)-C(28) | 131.46(14) |
| C(19)-C(17)-C(16)   | 99.88(12)  | C(26)-C(25)-C(28) | 106.55(13) |
| C(19)-C(17)-H(17)   | 117.3      | C(25)-C(26)-C(30) | 106.74(13) |
| C(19)-C(18)-C(15)   | 106.56(13) | C(27)-C(26)-C(25) | 122.33(14) |
| C(45)-C(18)-C(15)   | 132.02(14) | C(27)-C(26)-C(30) | 130.79(14) |
| C(45)-C(18)-C(19)   | 120.08(14) | C(22)-C(27)-H(27) | 122.2      |
| C(18)-C(19)-C(17)   | 106.17(13) | C(26)-C(27)-C(22) | 115.52(14) |
| C(31)-C(19)-C(17)   | 132.55(14) | C(26)-C(27)-H(27) | 122.2      |
| C(31)-C(19)-C(18)   | 119.91(14) | C(25)-C(28)-H(28) | 117.2      |
| O(6)-C(20)-N(2)     | 124.98(14) | C(25)-C(28)-C(29) | 98.91(12)  |

|                     |            |                   |            |
|---------------------|------------|-------------------|------------|
| C(25)-C(28)-C(31)   | 103.35(12) | C(35)-C(34)-C(33) | 108.07(13) |
| C(29)-C(28)-H(28)   | 117.2      | C(37)-C(34)-C(33) | 129.31(14) |
| C(31)-C(28)-H(28)   | 117.2      | C(37)-C(34)-C(35) | 122.62(14) |
| C(31)-C(28)-C(29)   | 100.08(12) | C(34)-C(35)-C(36) | 108.36(13) |
| C(28)-C(29)-H(29A)  | 112.8      | C(34)-C(35)-C(40) | 122.38(14) |
| C(28)-C(29)-H(29B)  | 112.8      | C(40)-C(35)-C(36) | 129.26(14) |
| C(28)-C(29)-C(30)   | 94.79(12)  | O(9)-C(36)-N(3)   | 125.32(14) |
| H(29A)-C(29)-H(29B) | 110.2      | O(9)-C(36)-C(35)  | 129.44(14) |
| C(30)-C(29)-H(29A)  | 112.8      | N(3)-C(36)-C(35)  | 105.20(13) |
| C(30)-C(29)-H(29B)  | 112.8      | C(34)-C(37)-H(37) | 122.4      |
| C(26)-C(30)-C(29)   | 98.84(12)  | C(38)-C(37)-C(34) | 115.19(14) |
| C(26)-C(30)-H(30)   | 117.3      | C(38)-C(37)-H(37) | 122.4      |
| C(26)-C(30)-C(32)   | 103.10(12) | C(37)-C(38)-C(39) | 122.42(14) |
| C(29)-C(30)-H(30)   | 117.3      | C(37)-C(38)-C(41) | 130.71(14) |
| C(32)-C(30)-C(29)   | 100.07(12) | C(39)-C(38)-C(41) | 106.80(13) |
| C(32)-C(30)-H(30)   | 117.3      | C(38)-C(39)-C(43) | 106.80(13) |
| C(19)-C(31)-C(28)   | 132.70(14) | C(40)-C(39)-C(38) | 121.94(14) |
| C(19)-C(31)-C(32)   | 119.95(14) | C(40)-C(39)-C(43) | 131.19(14) |
| C(32)-C(31)-C(28)   | 106.16(13) | C(35)-C(40)-H(40) | 122.3      |
| C(31)-C(32)-C(30)   | 106.58(13) | C(39)-C(40)-C(35) | 115.43(14) |
| C(44)-C(32)-C(30)   | 132.02(14) | C(39)-C(40)-H(40) | 122.3      |
| C(44)-C(32)-C(31)   | 120.09(14) | C(38)-C(41)-H(41) | 117.3      |
| O(8)-C(33)-N(3)     | 125.20(14) | C(38)-C(41)-C(42) | 99.16(12)  |
| O(8)-C(33)-C(34)    | 129.18(14) | C(38)-C(41)-C(44) | 102.53(12) |
| N(3)-C(33)-C(34)    | 105.58(13) | C(42)-C(41)-H(41) | 117.3      |

|                     |            |                      |            |
|---------------------|------------|----------------------|------------|
| C(44)-C(41)-H(41)   | 117.3      | Cl(5C)-C(3S)-H(3SF)  | 107.2      |
| C(44)-C(41)-C(42)   | 100.12(12) | Cl(5S)-C(3S)-H(3SA)  | 109.5      |
| C(41)-C(42)-H(42A)  | 112.8      | Cl(5S)-C(3S)-H(3SB)  | 109.5      |
| C(41)-C(42)-H(42B)  | 112.8      | Cl(6B)-C(3S)-H(3SC)  | 109.0      |
| H(42A)-C(42)-H(42B) | 110.2      | Cl(6B)-C(3S)-H(3SD)  | 109.0      |
| C(43)-C(42)-C(41)   | 94.84(11)  | Cl(6C)-C(3S)-H(3SE)  | 107.2      |
| C(43)-C(42)-H(42A)  | 112.8      | Cl(6C)-C(3S)-H(3SF)  | 107.2      |
| C(43)-C(42)-H(42B)  | 112.8      | Cl(6S)-C(3S)-Cl(5S)  | 110.56(17) |
| C(39)-C(43)-C(42)   | 99.19(12)  | Cl(6S)-C(3S)-H(3SA)  | 109.5      |
| C(39)-C(43)-H(43)   | 117.4      | Cl(6S)-C(3S)-H(3SB)  | 109.5      |
| C(39)-C(43)-C(45)   | 102.52(12) | H(3SA)-C(3S)-H(3SB)  | 108.1      |
| C(42)-C(43)-H(43)   | 117.4      | H(3SC)-C(3S)-H(3SD)  | 107.8      |
| C(45)-C(43)-C(42)   | 99.70(12)  | H(3SE)-C(3S)-H(3SF)  | 106.8      |
| C(45)-C(43)-H(43)   | 117.4      | Cl(1S)-C(1S)-H(1SA)  | 109.3      |
| C(32)-C(44)-C(41)   | 132.30(14) | Cl(1S)-C(1S)-H(1SB)  | 109.3      |
| C(32)-C(44)-C(45)   | 119.99(14) | Cl(2S)-C(1S)-Cl(1S)  | 111.55(9)  |
| C(45)-C(44)-C(41)   | 106.23(13) | Cl(2S)-C(1S)-H(1SA)  | 109.3      |
| C(18)-C(45)-C(43)   | 132.06(14) | Cl(2S)-C(1S)-H(1SB)  | 109.3      |
| C(18)-C(45)-C(44)   | 119.96(14) | H(1SA)-C(1S)-H(1SB)  | 108.0      |
| C(44)-C(45)-C(43)   | 106.68(13) | Cl(3B)-C(2SB)-H(2SA) | 109.1      |
| Cl(5B)-C(3S)-Cl(6B) | 113.1(6)   | Cl(3B)-C(2SB)-H(2SB) | 109.1      |
| Cl(5B)-C(3S)-H(3SC) | 109.0      | Cl(4B)-C(2SB)-Cl(3B) | 112.6(19)  |
| Cl(5B)-C(3S)-H(3SD) | 109.0      | Cl(4B)-C(2SB)-H(2SA) | 109.1      |
| Cl(5C)-C(3S)-Cl(6C) | 120.5(8)   | Cl(4B)-C(2SB)-H(2SB) | 109.1      |
| Cl(5C)-C(3S)-H(3SE) | 107.2      | H(2SA)-C(2SB)-H(2SB) | 107.8      |

|                     |            |
|---------------------|------------|
| Cl(3S)-C(2S)-Cl(4S) | 111.67(11) |
| Cl(3S)-C(2S)-H(2SC) | 109.3      |
| Cl(3S)-C(2S)-H(2SD) | 109.3      |
| Cl(4S)-C(2S)-H(2SC) | 109.3      |
| Cl(4S)-C(2S)-H(2SD) | 109.3      |
| H(2SC)-C(2S)-H(2SD) | 107.9      |

---



**Table 4.** Anisotropic displacement parameters ( $\text{\AA}^2 \times 10^3$ ) for capsularene **1**. The anisotropic displacement factor exponent takes the form:  $-2\pi^2 [ h^2 a^{*2} U^{11} + \dots + 2 h k a^* b^* U^{12} ]$

|      | $U^{11}$ | $U^{22}$ | $U^{33}$ | $U^{23}$ | $U^{13}$ | $U^{12}$ |
|------|----------|----------|----------|----------|----------|----------|
| O(1) | 17(1)    | 16(1)    | 19(1)    | -2(1)    | 0(1)     | 1(1)     |
| O(2) | 16(1)    | 15(1)    | 19(1)    | -2(1)    | 0(1)     | 0(1)     |
| O(3) | 16(1)    | 16(1)    | 17(1)    | -1(1)    | 0(1)     | -1(1)    |
| O(4) | 20(1)    | 20(1)    | 22(1)    | -3(1)    | 2(1)     | 1(1)     |
| O(5) | 19(1)    | 20(1)    | 18(1)    | -1(1)    | -2(1)    | 0(1)     |
| O(6) | 18(1)    | 20(1)    | 18(1)    | -1(1)    | -4(1)    | 1(1)     |
| O(7) | 22(1)    | 18(1)    | 22(1)    | 3(1)     | 1(1)     | -1(1)    |
| O(8) | 19(1)    | 16(1)    | 25(1)    | 2(1)     | 1(1)     | -2(1)    |
| O(9) | 16(1)    | 16(1)    | 24(1)    | -1(1)    | 0(1)     | 2(1)     |
| N(1) | 15(1)    | 17(1)    | 18(1)    | -1(1)    | -1(1)    | 1(1)     |
| N(2) | 14(1)    | 17(1)    | 19(1)    | -1(1)    | -1(1)    | 0(1)     |
| N(3) | 12(1)    | 15(1)    | 20(1)    | 1(1)     | 1(1)     | -1(1)    |
| C(1) | 14(1)    | 18(1)    | 20(1)    | -1(1)    | -1(1)    | 2(1)     |
| C(2) | 14(1)    | 18(1)    | 18(1)    | -2(1)    | -1(1)    | 2(1)     |
| C(3) | 14(1)    | 19(1)    | 22(1)    | -4(1)    | 0(1)     | -2(1)    |
| C(4) | 14(1)    | 17(1)    | 21(1)    | -2(1)    | -1(1)    | -2(1)    |
| C(5) | 12(1)    | 18(1)    | 19(1)    | 0(1)     | 2(1)     | -1(1)    |
| C(6) | 13(1)    | 17(1)    | 20(1)    | -1(1)    | 2(1)     | 0(1)     |
| C(7) | 16(1)    | 14(1)    | 18(1)    | 2(1)     | -1(1)    | 0(1)     |
| C(8) | 16(1)    | 14(1)    | 18(1)    | 2(1)     | 0(1)     | 2(1)     |

|       |       |       |       |       |       |       |
|-------|-------|-------|-------|-------|-------|-------|
| C(9)  | 16(1) | 15(1) | 17(1) | 2(1)  | -3(1) | -1(1) |
| C(10) | 15(1) | 14(1) | 18(1) | 2(1)  | 0(1)  | 2(1)  |
| C(11) | 18(1) | 13(1) | 18(1) | 0(1)  | -1(1) | 0(1)  |
| C(12) | 16(1) | 13(1) | 18(1) | 2(1)  | -3(1) | 0(1)  |
| C(13) | 16(1) | 15(1) | 16(1) | 2(1)  | 1(1)  | 1(1)  |
| C(14) | 18(1) | 16(1) | 16(1) | 1(1)  | 0(1)  | 0(1)  |
| C(15) | 14(1) | 14(1) | 19(1) | 1(1)  | -2(1) | -1(1) |
| C(16) | 17(1) | 18(1) | 20(1) | 2(1)  | 0(1)  | -3(1) |
| C(17) | 14(1) | 17(1) | 18(1) | 1(1)  | 1(1)  | -1(1) |
| C(18) | 10(1) | 14(1) | 20(1) | -1(1) | -1(1) | -1(1) |
| C(19) | 11(1) | 19(1) | 16(1) | 0(1)  | 1(1)  | -1(1) |
| C(20) | 16(1) | 12(1) | 19(1) | -4(1) | -1(1) | -1(1) |
| C(21) | 16(1) | 14(1) | 17(1) | -3(1) | -3(1) | 1(1)  |
| C(22) | 17(1) | 13(1) | 18(1) | -2(1) | 0(1)  | -1(1) |
| C(23) | 18(1) | 14(1) | 20(1) | -2(1) | -1(1) | 0(1)  |
| C(24) | 17(1) | 16(1) | 16(1) | -2(1) | -1(1) | 1(1)  |
| C(25) | 16(1) | 14(1) | 17(1) | -3(1) | 0(1)  | 0(1)  |
| C(26) | 16(1) | 13(1) | 19(1) | -4(1) | -4(1) | 2(1)  |
| C(27) | 20(1) | 13(1) | 17(1) | 0(1)  | -2(1) | 1(1)  |
| C(28) | 14(1) | 18(1) | 18(1) | -3(1) | -1(1) | 0(1)  |
| C(29) | 16(1) | 17(1) | 22(1) | -5(1) | -1(1) | 2(1)  |
| C(30) | 15(1) | 14(1) | 19(1) | -2(1) | -4(1) | 1(1)  |
| C(31) | 11(1) | 17(1) | 18(1) | -2(1) | 0(1)  | 1(1)  |
| C(32) | 10(1) | 15(1) | 19(1) | -2(1) | -2(1) | 1(1)  |
| C(33) | 16(1) | 16(1) | 14(1) | -1(1) | 0(1)  | 1(1)  |

|        |        |        |        |        |        |       |
|--------|--------|--------|--------|--------|--------|-------|
| C(34)  | 16(1)  | 14(1)  | 14(1)  | 0(1)   | 0(1)   | -1(1) |
| C(35)  | 14(1)  | 14(1)  | 14(1)  | -1(1)  | 0(1)   | 1(1)  |
| C(36)  | 15(1)  | 17(1)  | 14(1)  | -1(1)  | 0(1)   | -2(1) |
| C(37)  | 18(1)  | 13(1)  | 15(1)  | 1(1)   | -1(1)  | 0(1)  |
| C(38)  | 15(1)  | 15(1)  | 14(1)  | 0(1)   | -1(1)  | 2(1)  |
| C(39)  | 14(1)  | 15(1)  | 14(1)  | -2(1)  | 0(1)   | -2(1) |
| C(40)  | 17(1)  | 13(1)  | 15(1)  | -1(1)  | -1(1)  | 1(1)  |
| C(41)  | 14(1)  | 16(1)  | 16(1)  | 0(1)   | -1(1)  | 1(1)  |
| C(42)  | 14(1)  | 18(1)  | 18(1)  | -1(1)  | -2(1)  | 1(1)  |
| C(43)  | 12(1)  | 14(1)  | 16(1)  | -1(1)  | -1(1)  | 0(1)  |
| C(44)  | 10(1)  | 15(1)  | 17(1)  | 1(1)   | -1(1)  | 2(1)  |
| C(45)  | 10(1)  | 16(1)  | 18(1)  | -3(1)  | -1(1)  | -1(1) |
| Cl(5B) | 115(8) | 31(3)  | 24(2)  | -3(2)  | -14(3) | 15(4) |
| Cl(5C) | 92(8)  | 61(7)  | 63(5)  | 1(4)   | 14(5)  | 13(7) |
| Cl(5S) | 51(1)  | 22(1)  | 32(1)  | -4(1)  | -13(1) | 7(1)  |
| Cl(6B) | 28(2)  | 102(6) | 38(2)  | 0(3)   | -2(1)  | 4(3)  |
| Cl(6C) | 37(4)  | 46(5)  | 112(8) | 3(5)   | 10(4)  | -7(4) |
| Cl(6S) | 26(1)  | 65(1)  | 41(1)  | -19(1) | -3(1)  | 2(1)  |
| C(3S)  | 28(1)  | 30(1)  | 35(1)  | -7(1)  | -4(1)  | 2(1)  |
| Cl(1S) | 23(1)  | 30(1)  | 29(1)  | -7(1)  | -4(1)  | 4(1)  |
| Cl(2S) | 22(1)  | 25(1)  | 34(1)  | -4(1)  | 0(1)   | -2(1) |
| C(1S)  | 21(1)  | 21(1)  | 36(1)  | -11(1) | -2(1)  | 2(1)  |
| Cl(3B) | 34(1)  | 32(1)  | 26(1)  | -2(1)  | 0(1)   | 0(1)  |
| Cl(4B) | 36(1)  | 43(1)  | 21(1)  | -2(1)  | -4(1)  | 2(1)  |
| C(2SB) | 35(1)  | 24(1)  | 15(1)  | 0(1)   | -1(1)  | 1(1)  |

|        |       |       |       |       |       |      |
|--------|-------|-------|-------|-------|-------|------|
| Cl(3S) | 34(1) | 32(1) | 26(1) | -2(1) | 0(1)  | 0(1) |
| Cl(4S) | 36(1) | 43(1) | 21(1) | -2(1) | -4(1) | 2(1) |
| C(2S)  | 35(1) | 24(1) | 15(1) | 0(1)  | -1(1) | 1(1) |

---

**Table 5.** Hydrogen coordinates ( $\times 10^4$ ) and isotropic displacement parameters ( $\text{\AA}^2 \times 10^{-3}$ ) for capsularene **1**.

|        | x    | y    | z    | U(eq) |
|--------|------|------|------|-------|
| H(1A)  | 1306 | 4051 | 5428 | 21    |
| H(1B)  | 1280 | 4667 | 5958 | 21    |
| H(2)   | 403  | 3158 | 6081 | 20    |
| H(3A)  | 1433 | -8   | 6053 | 22    |
| H(3B)  | 1377 | 531  | 5499 | 22    |
| H(4)   | 455  | 1476 | 6124 | 20    |
| H(5A)  | 1338 | 3021 | 7611 | 20    |
| H(5B)  | 1412 | 1853 | 7635 | 20    |
| H(6)   | 443  | 2352 | 6878 | 20    |
| H(11)  | 5513 | 5299 | 6533 | 20    |
| H(14)  | 5551 | 3450 | 4947 | 20    |
| H(15)  | 7862 | 5239 | 6434 | 19    |
| H(16A) | 9077 | 4698 | 5669 | 22    |
| H(16B) | 8084 | 5367 | 5438 | 22    |
| H(17)  | 7901 | 3639 | 5050 | 20    |
| H(24)  | 5560 | 1476 | 4986 | 20    |
| H(27)  | 5714 | -152 | 6638 | 20    |
| H(28)  | 7917 | 1482 | 5088 | 20    |
| H(29A) | 9176 | 547  | 5726 | 22    |

|        |      |      |      |    |
|--------|------|------|------|----|
| H(29B) | 8208 | -188 | 5532 | 22 |
| H(30)  | 8034 | 56   | 6525 | 19 |
| H(37)  | 5700 | 871  | 7516 | 19 |
| H(40)  | 5512 | 4366 | 7437 | 18 |
| H(41)  | 8016 | 1190 | 7495 | 18 |
| H(42A) | 8160 | 2760 | 8047 | 20 |
| H(42B) | 9141 | 2770 | 7622 | 20 |
| H(43)  | 7867 | 4237 | 7436 | 17 |
| H(3SA) | 8455 | 6983 | 5752 | 37 |
| H(3SB) | 8419 | 7967 | 5412 | 37 |
| H(3SC) | 8273 | 7887 | 5458 | 37 |
| H(3SD) | 8664 | 6872 | 5709 | 37 |
| H(3SE) | 8285 | 7615 | 5380 | 37 |
| H(3SF) | 9081 | 6851 | 5659 | 37 |
| H(1SA) | 8787 | 5237 | 2911 | 31 |
| H(1SB) | 9974 | 5668 | 3055 | 31 |
| H(2SA) | 4210 | 1589 | 4284 | 30 |
| H(2SB) | 4452 | 1155 | 3716 | 30 |
| H(2SC) | 6016 | 3179 | 3540 | 30 |
| H(2SD) | 6025 | 2022 | 3444 | 30 |

---
